# Supplementary material for: Genome-Wide Analysis of MYB Gene Family in Chrysanthemum ×morifolium Provides Insights into Flower Color Regulation
Source: MDPI journal article supplement (doi:10.3390/plants13091221), 2024-04-28
Supplement: s1 [file s1]

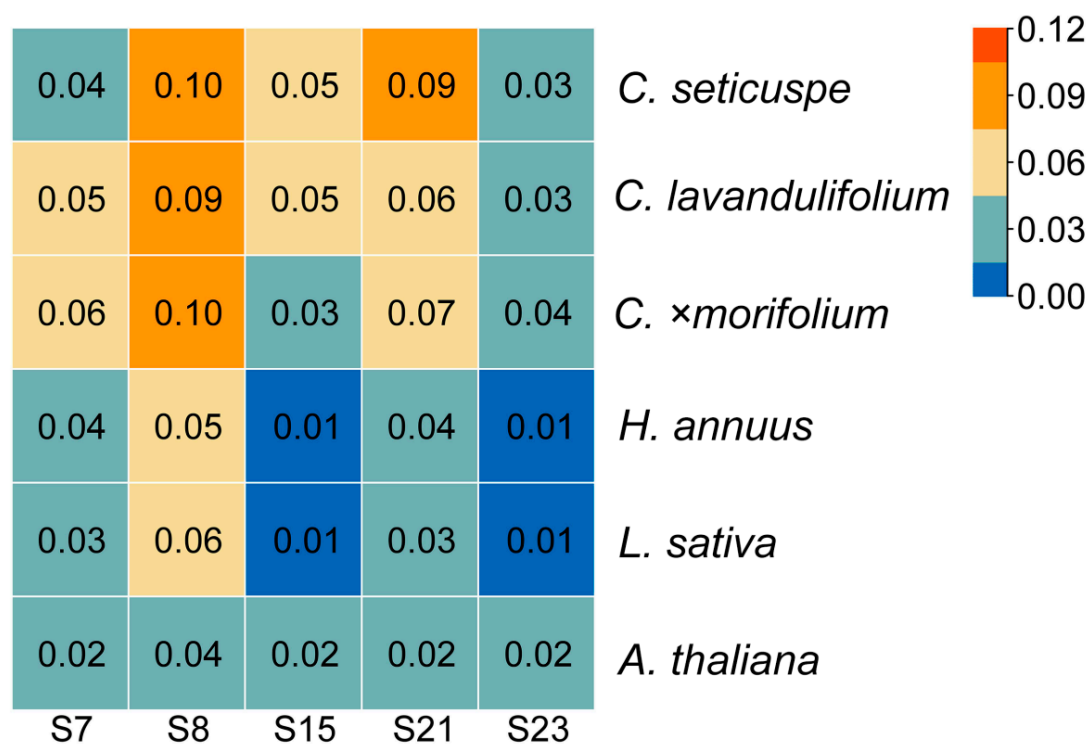

**Figure S1.** The proportions of representative lineages in Asteraceae species and *Arabidopsis thaliana*. The rows and columns respectively indicate different species and lineages.

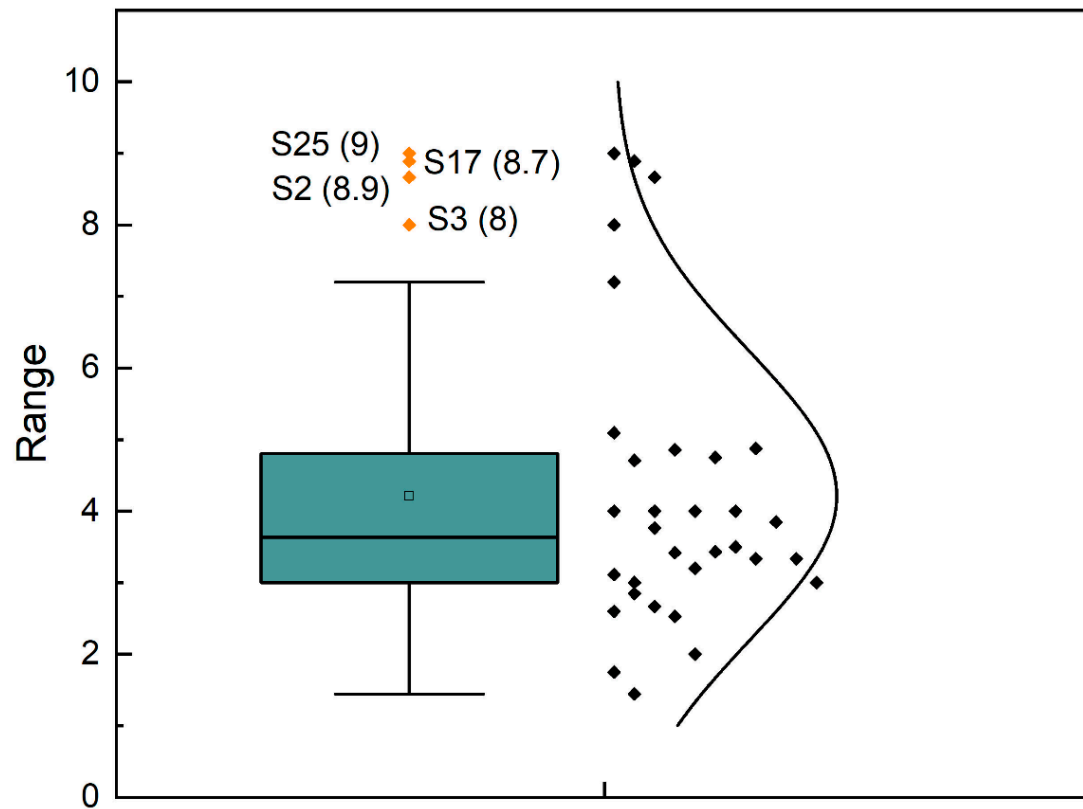

**Figure S2.** Boxplot of the ratio of *MYB* genes between *C. ×morifolium* and wild *Chrysanthemum* species in each lineage. Obvious outliers are marked in yellow.

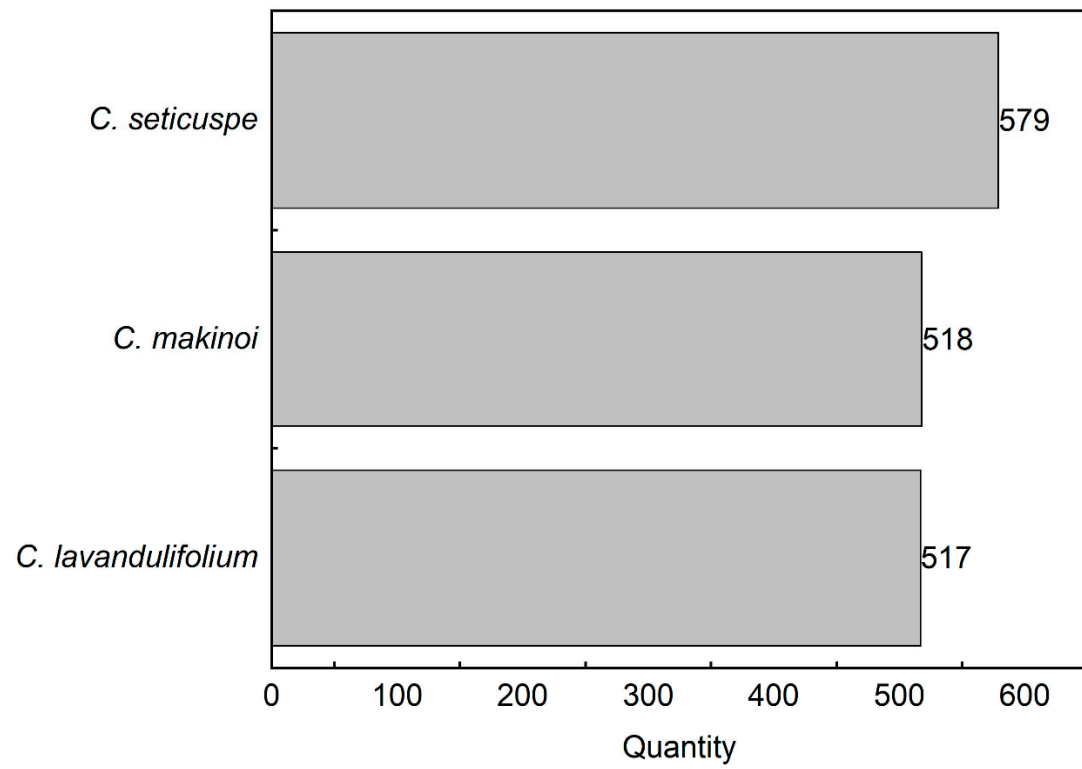

**Figure S3.** Statistics of syntenic *MYB* gene numbers between *C. ×morifolium* and wild *Chrysanthemum* species.

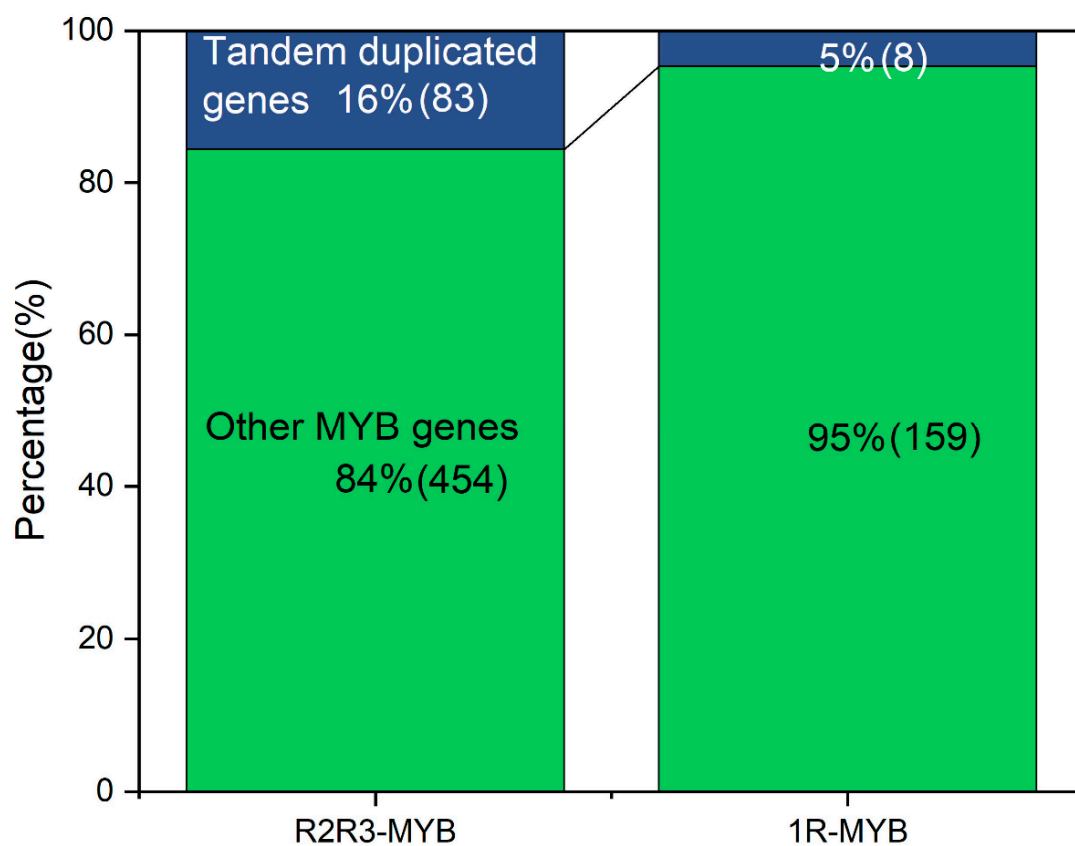

**Figure S4.** Number and proportion of tandem duplicated genes in R2R3-MYB and 1R-MYB in *C. ×morifolium*.

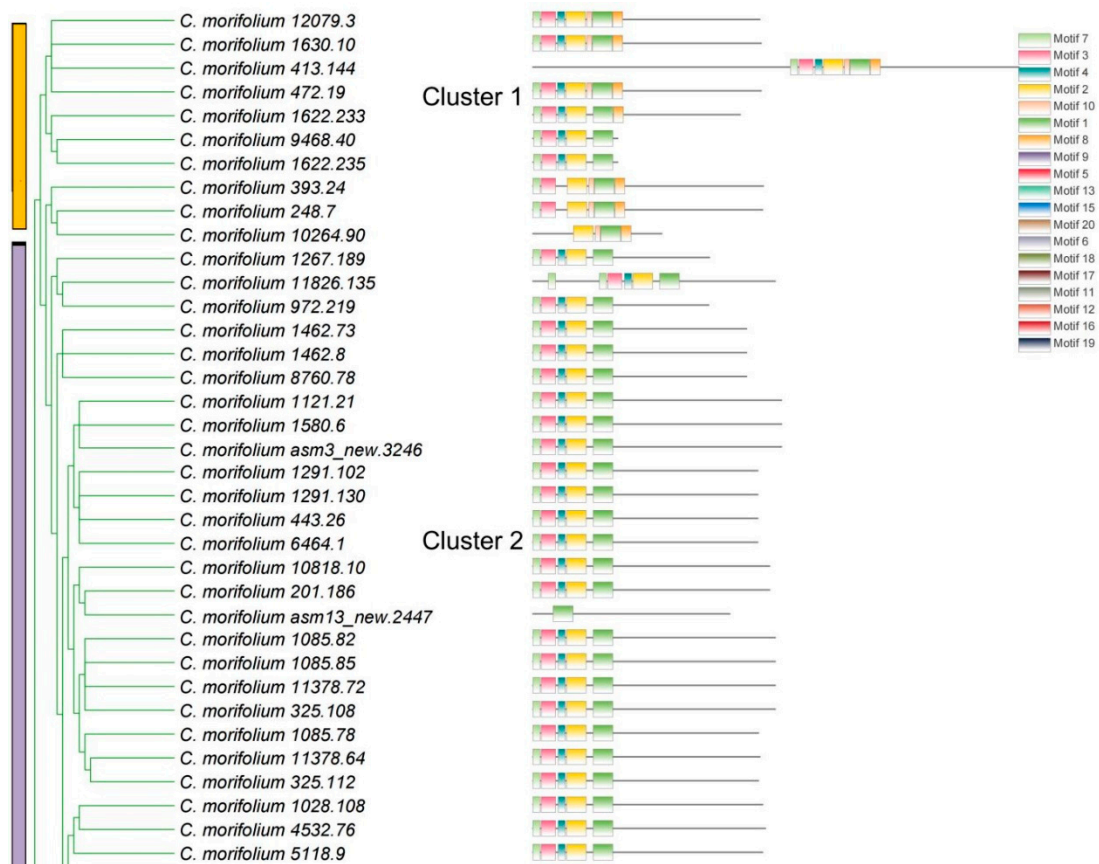

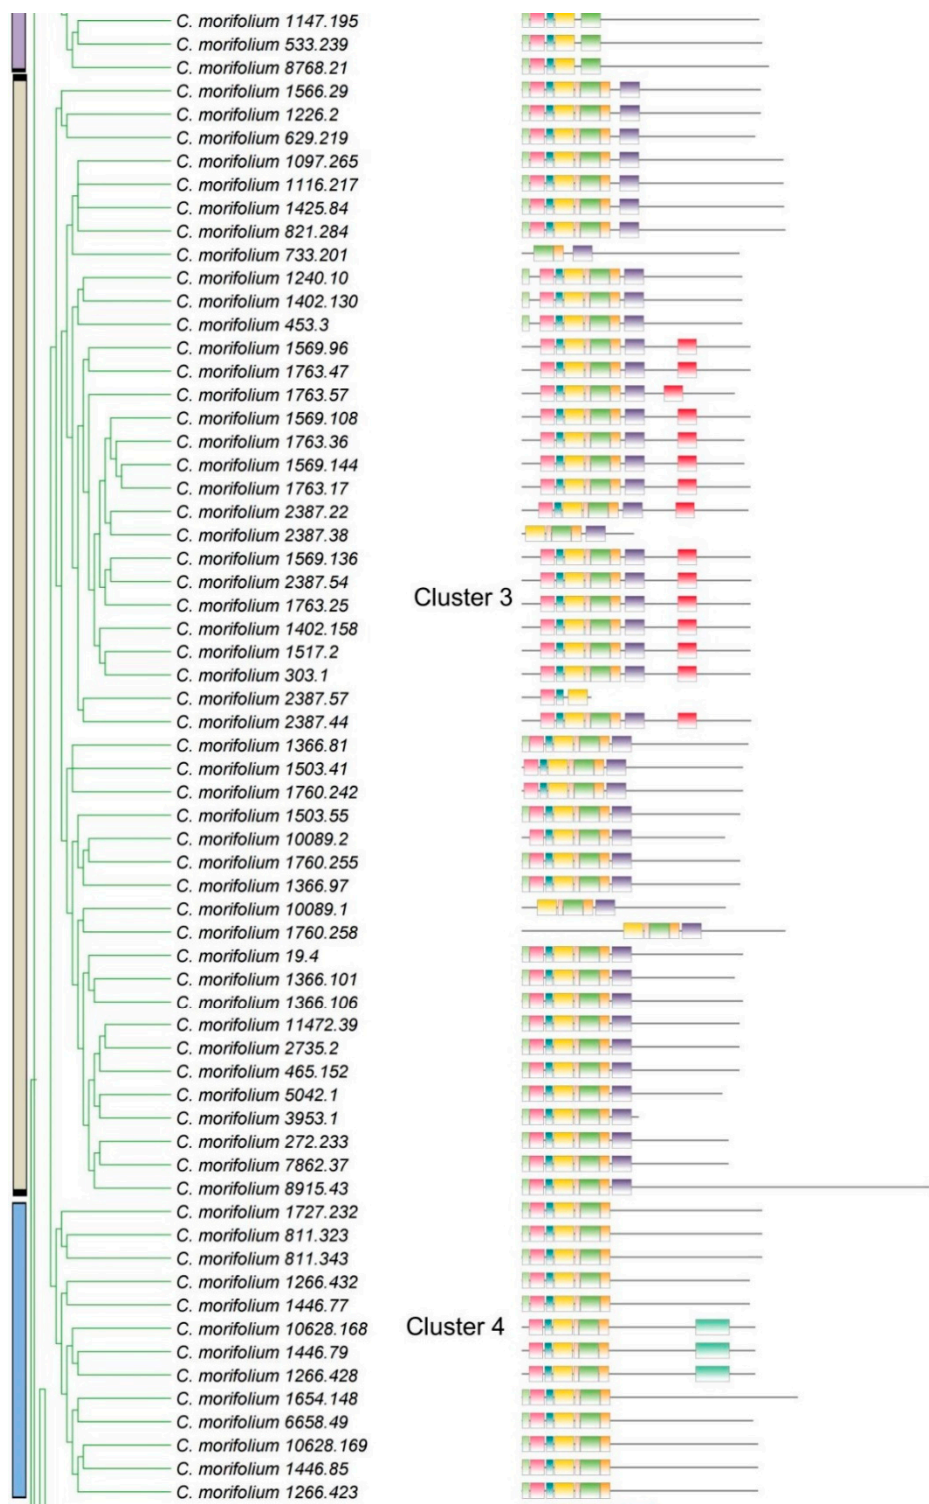

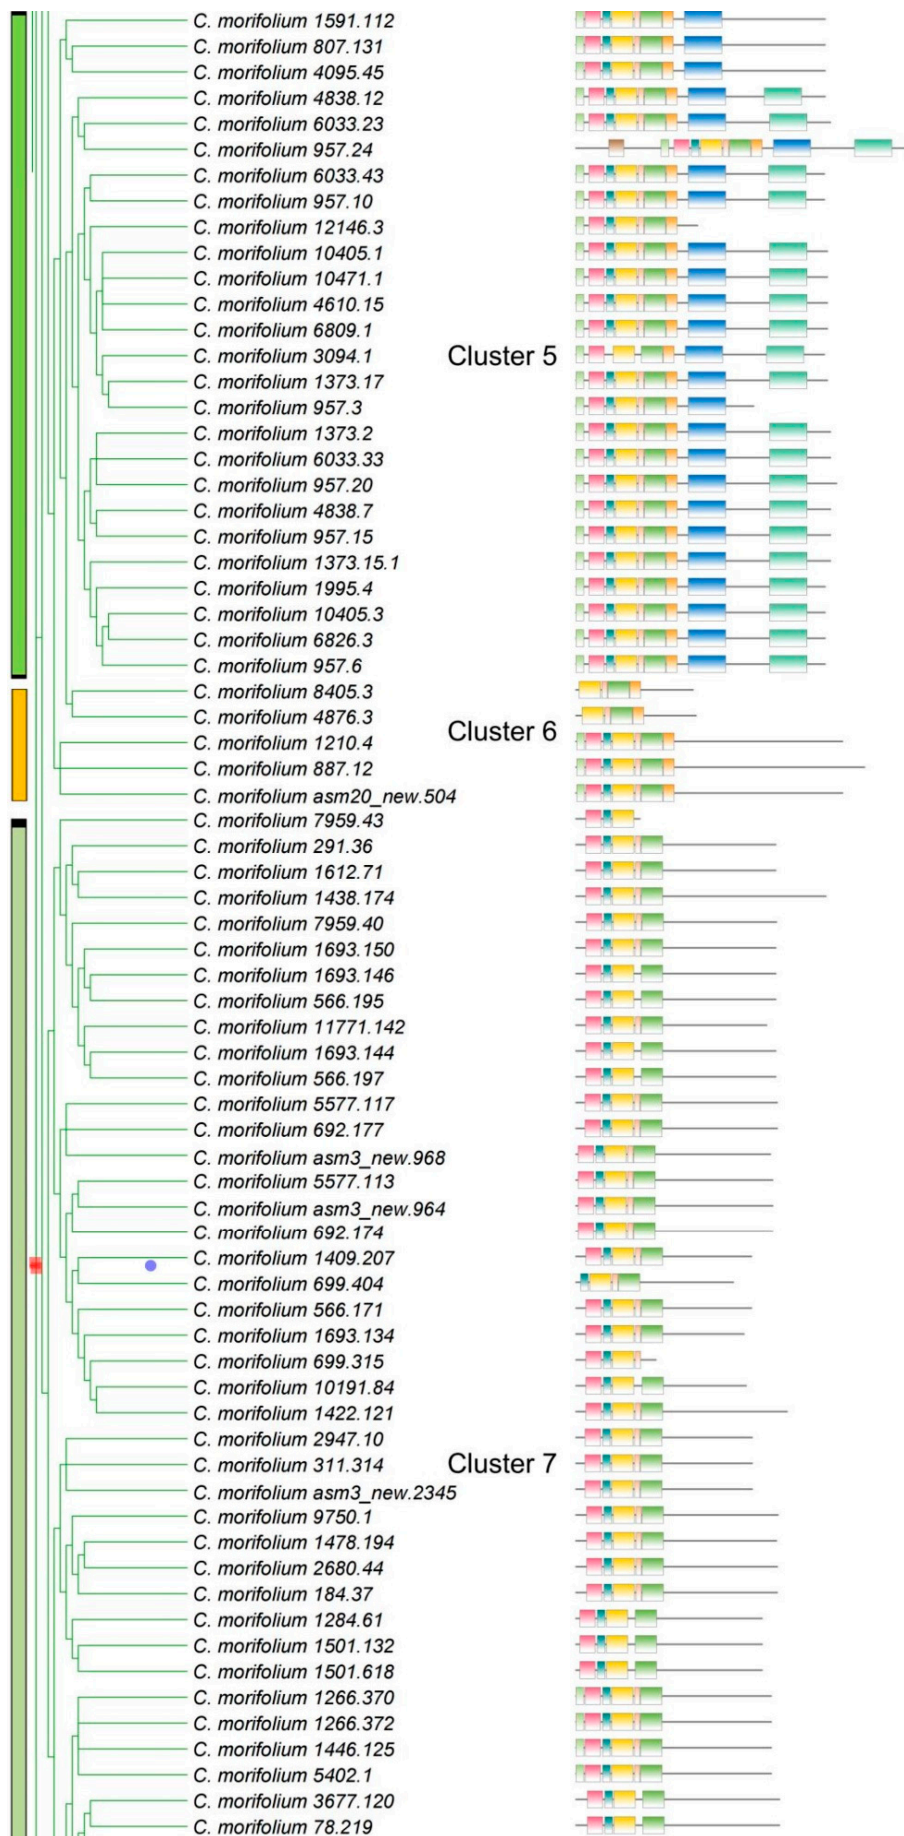



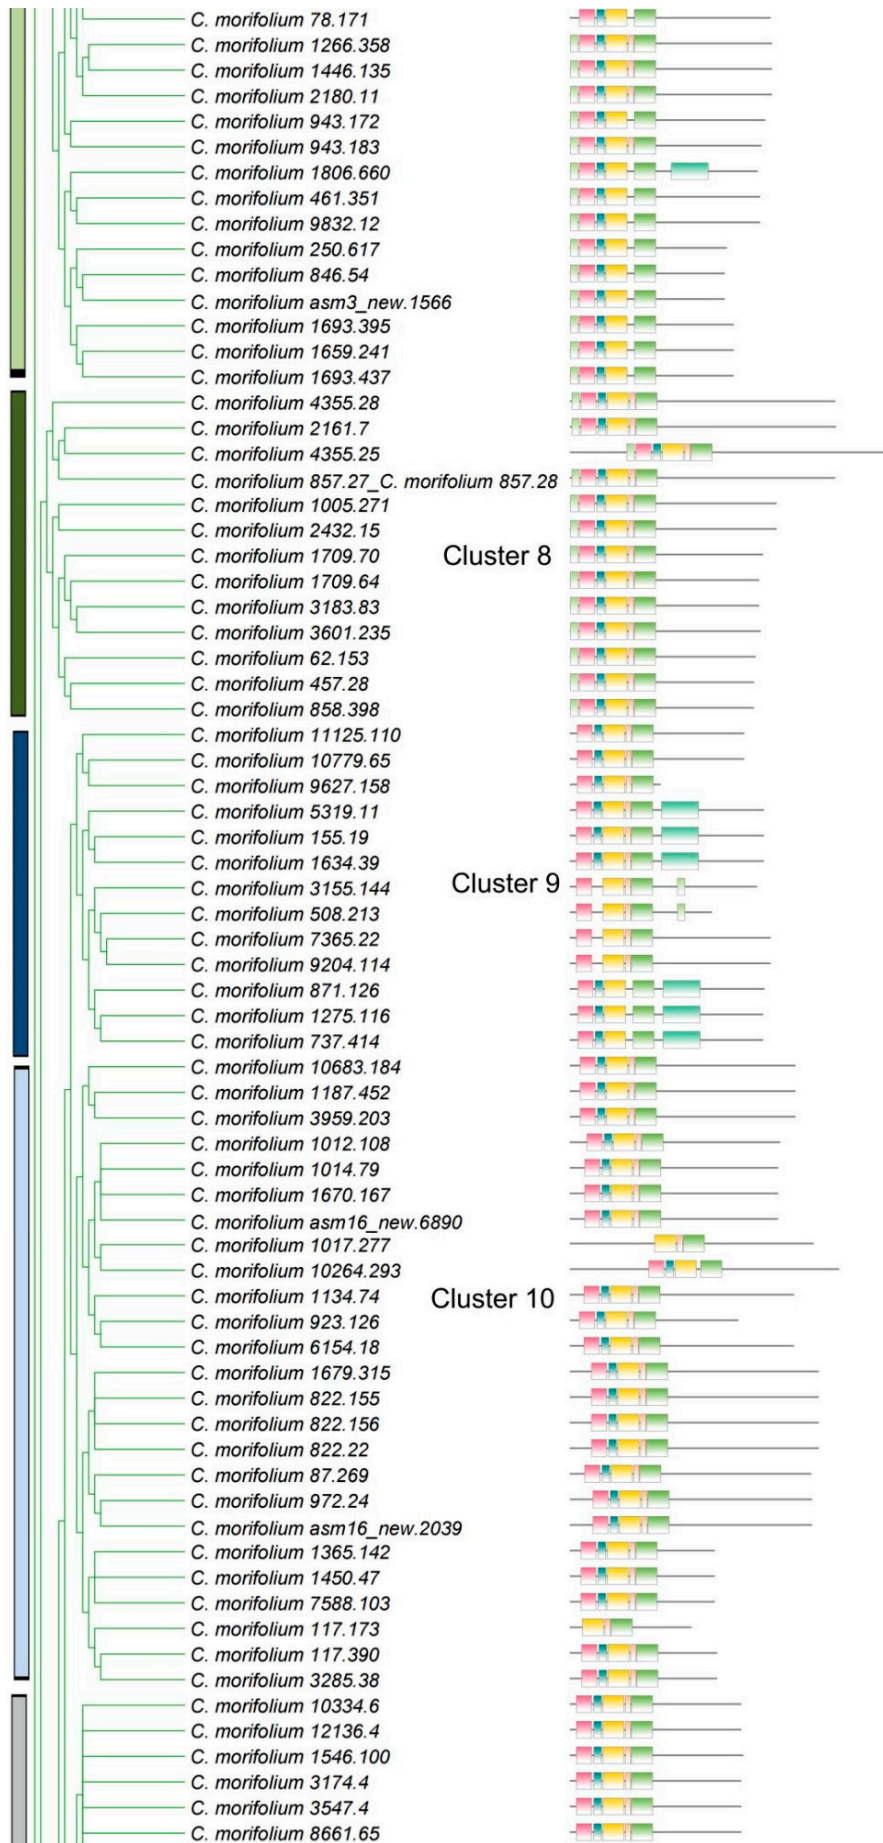



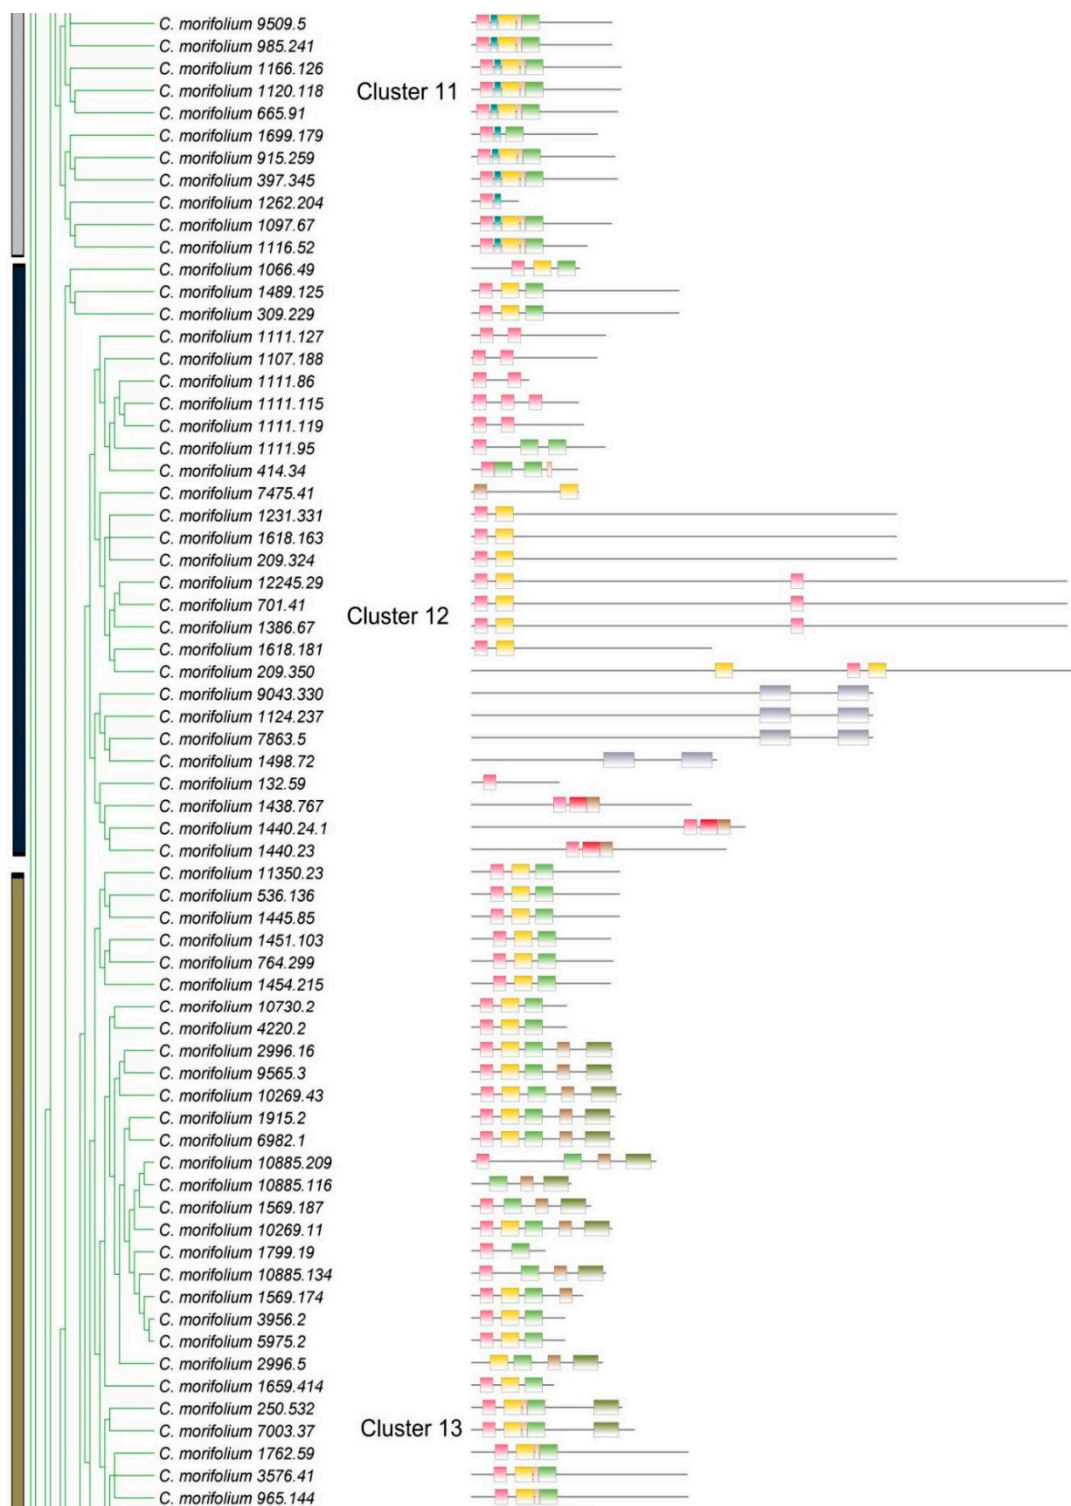

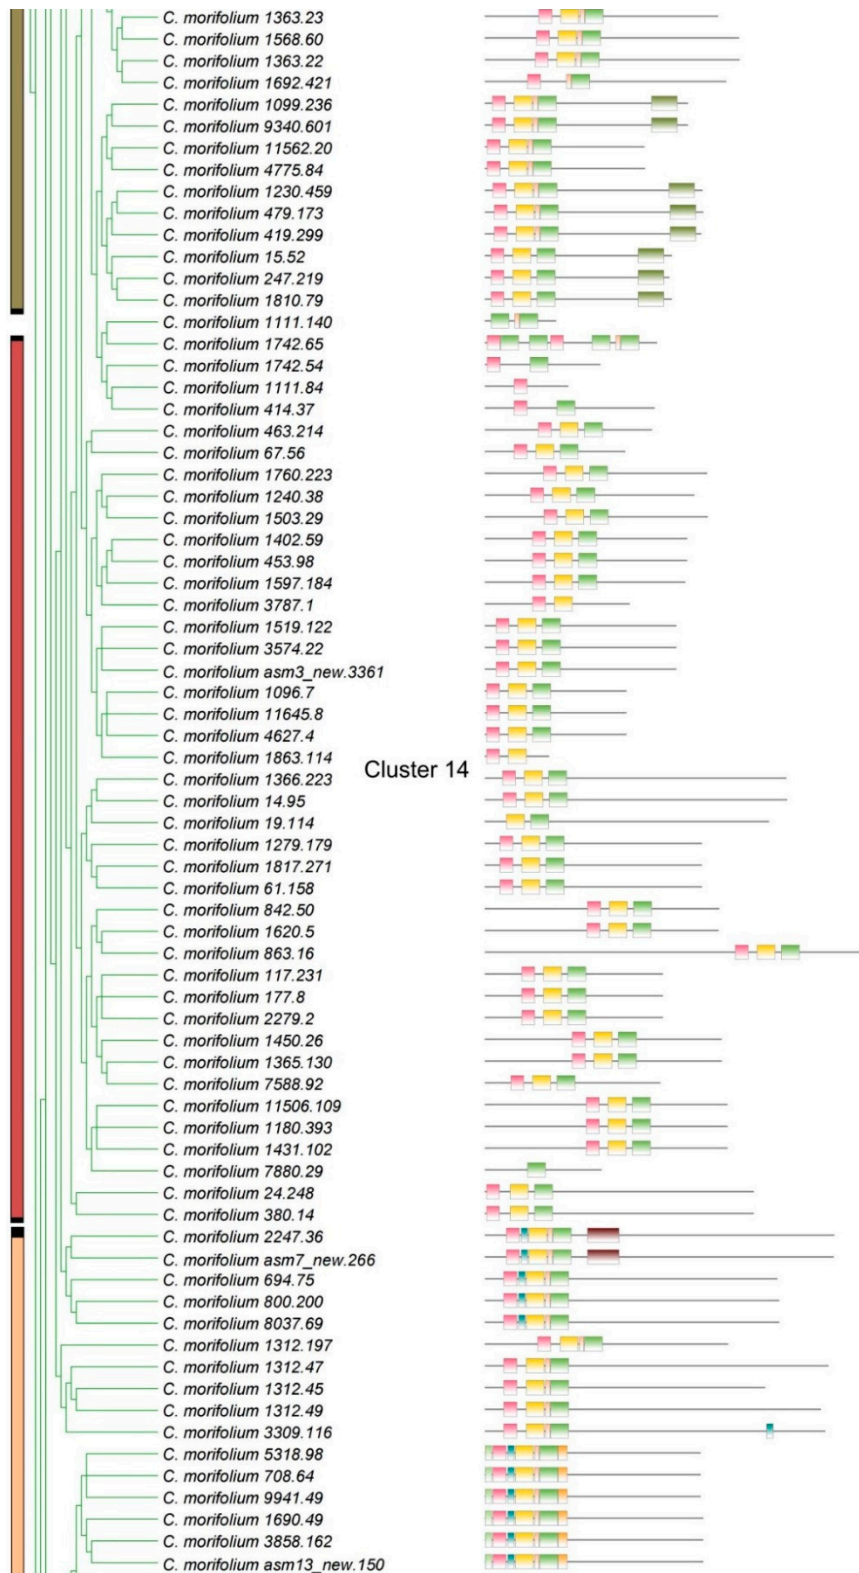

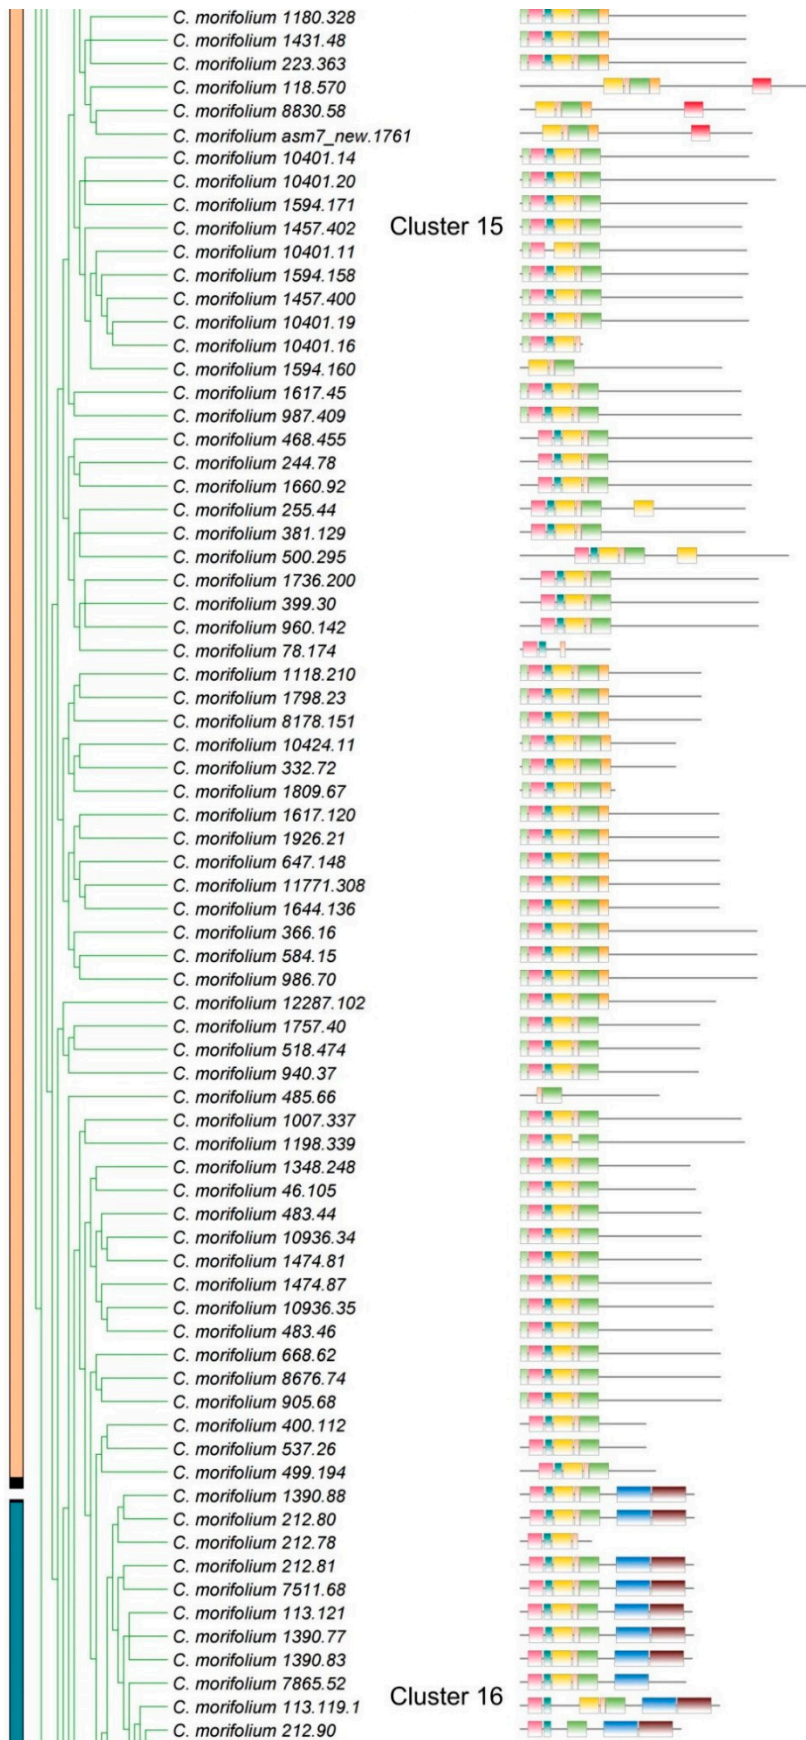



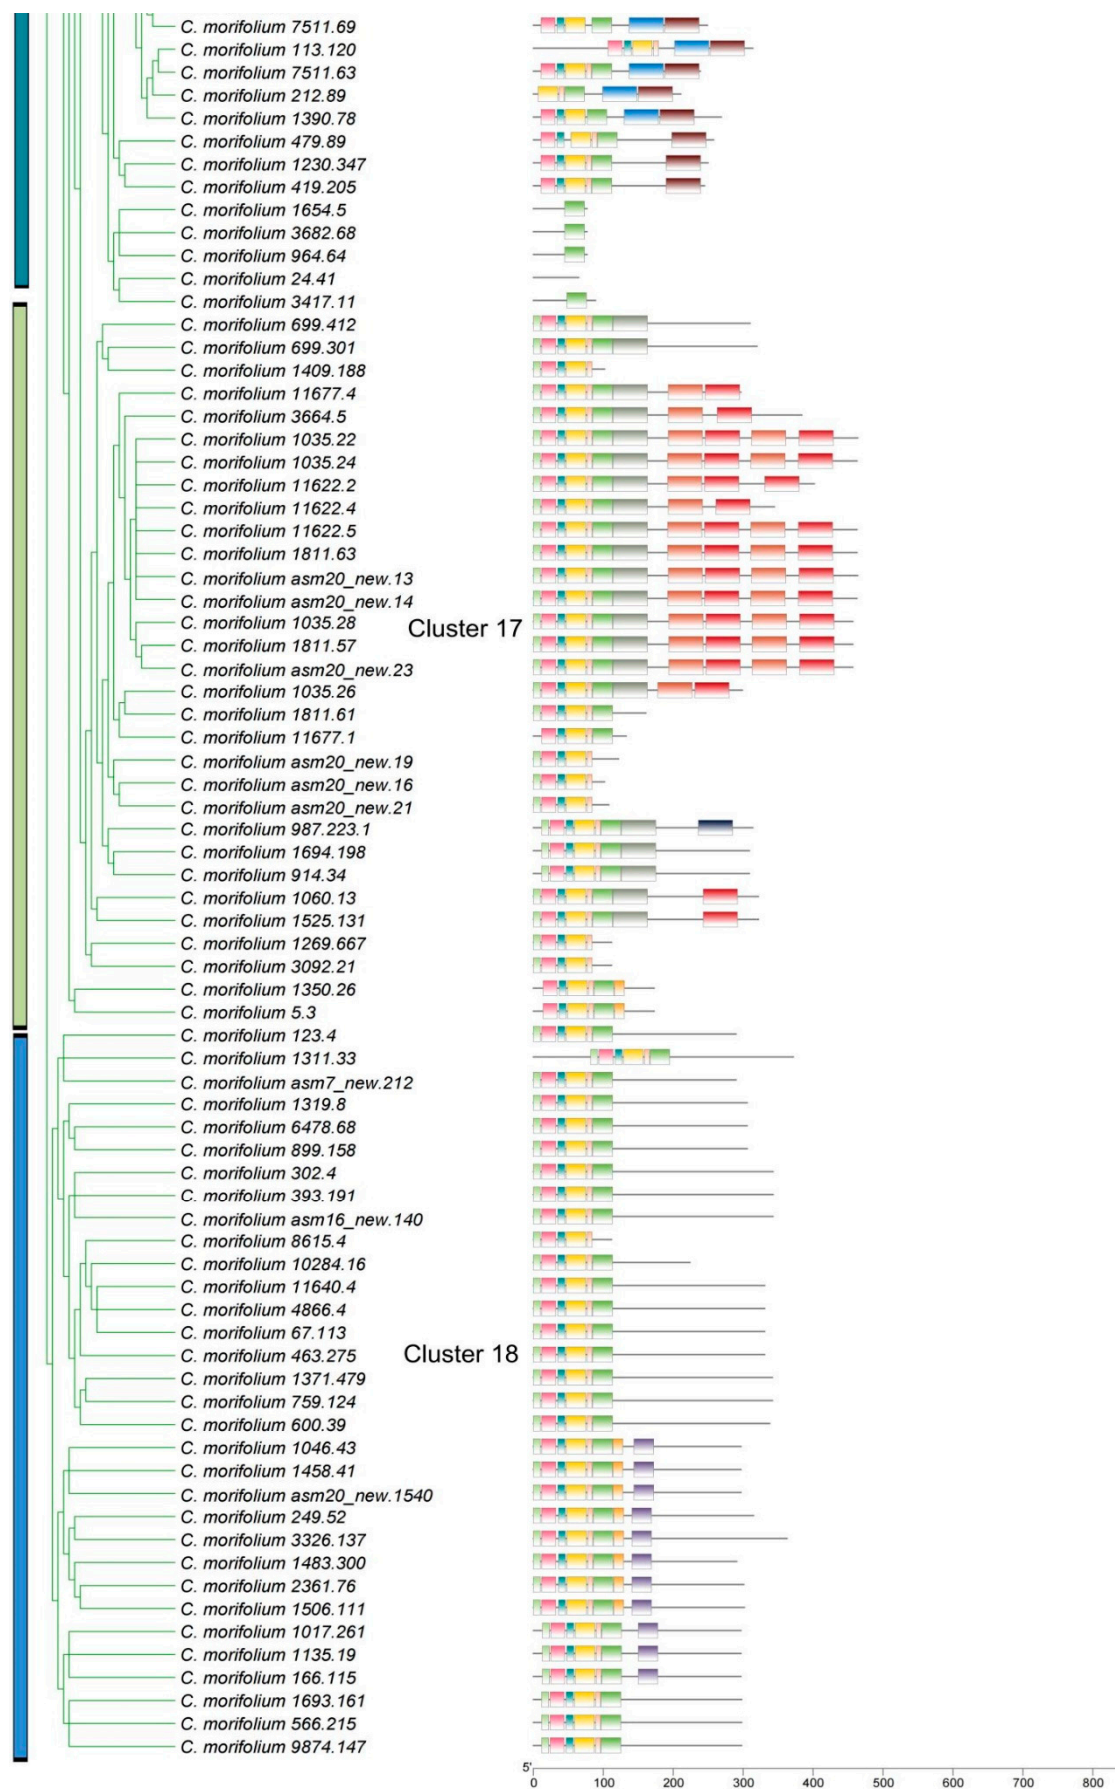

**Figure S5.** Sequence structure analysis of the R2R3-MYB subfamily. 19/20 conserved motifs exist in R2R3-MYBs.

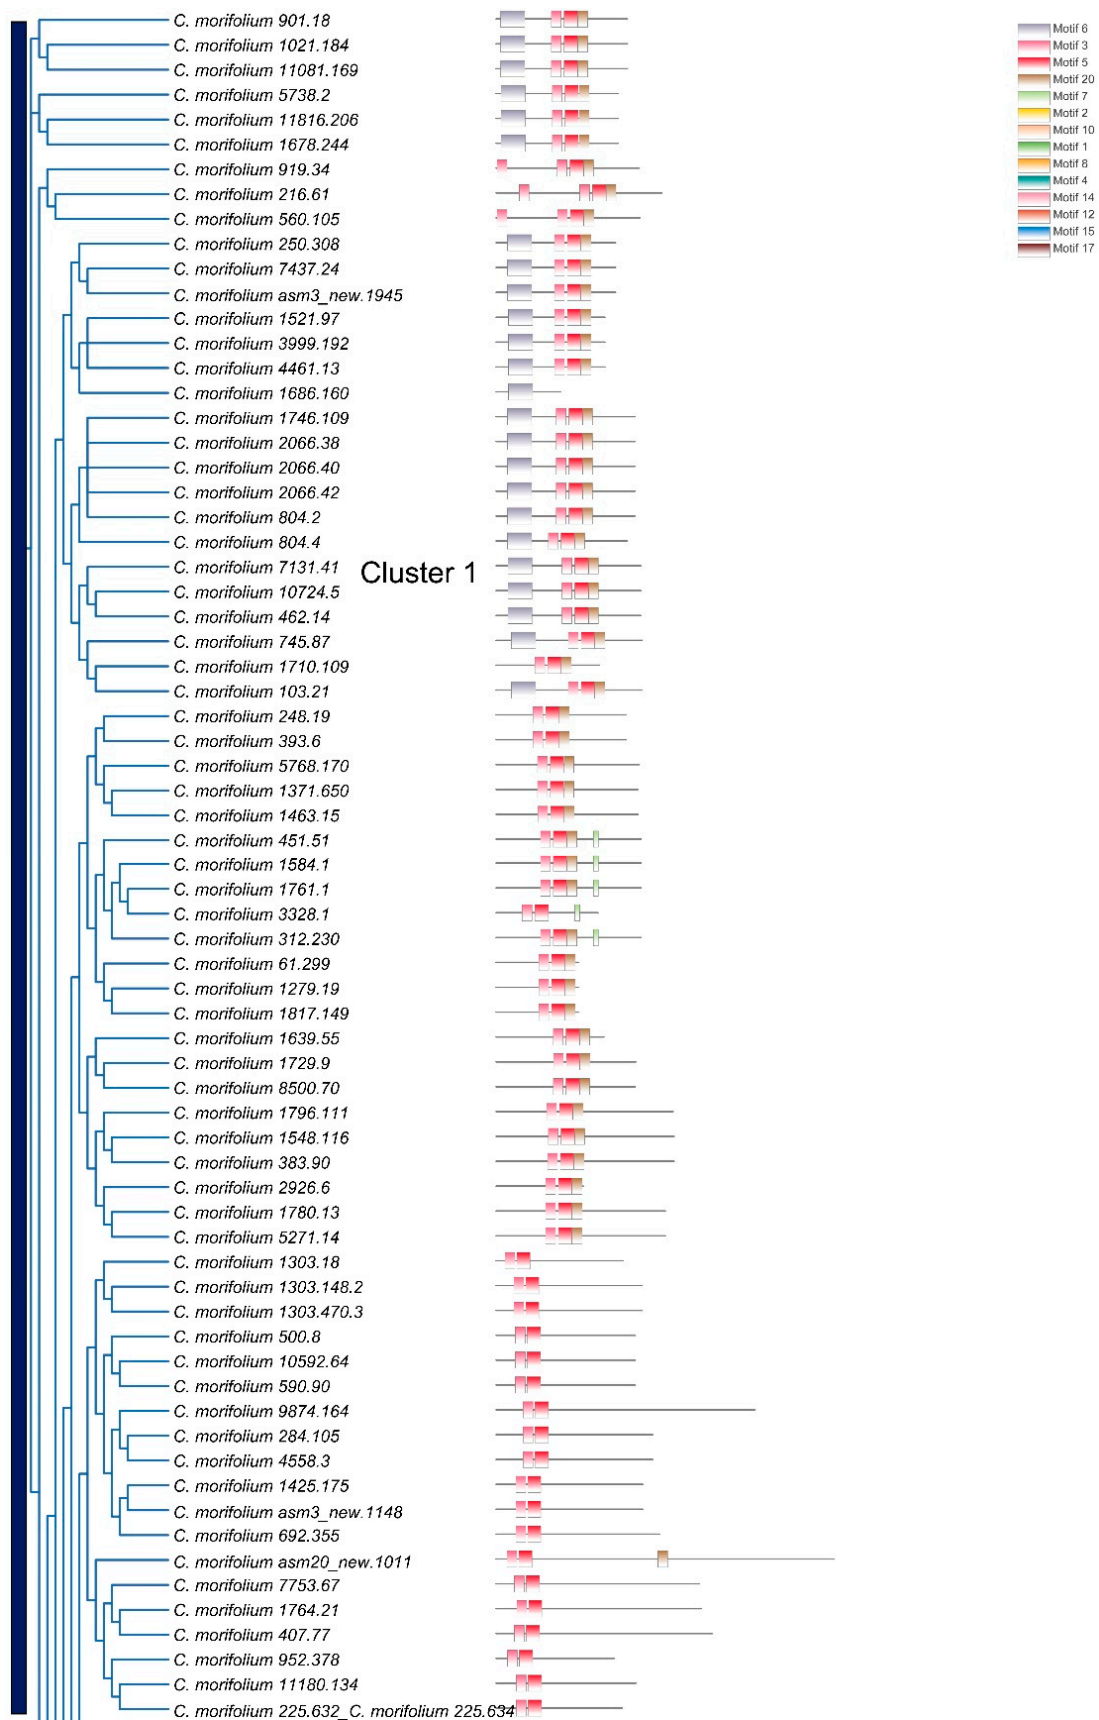

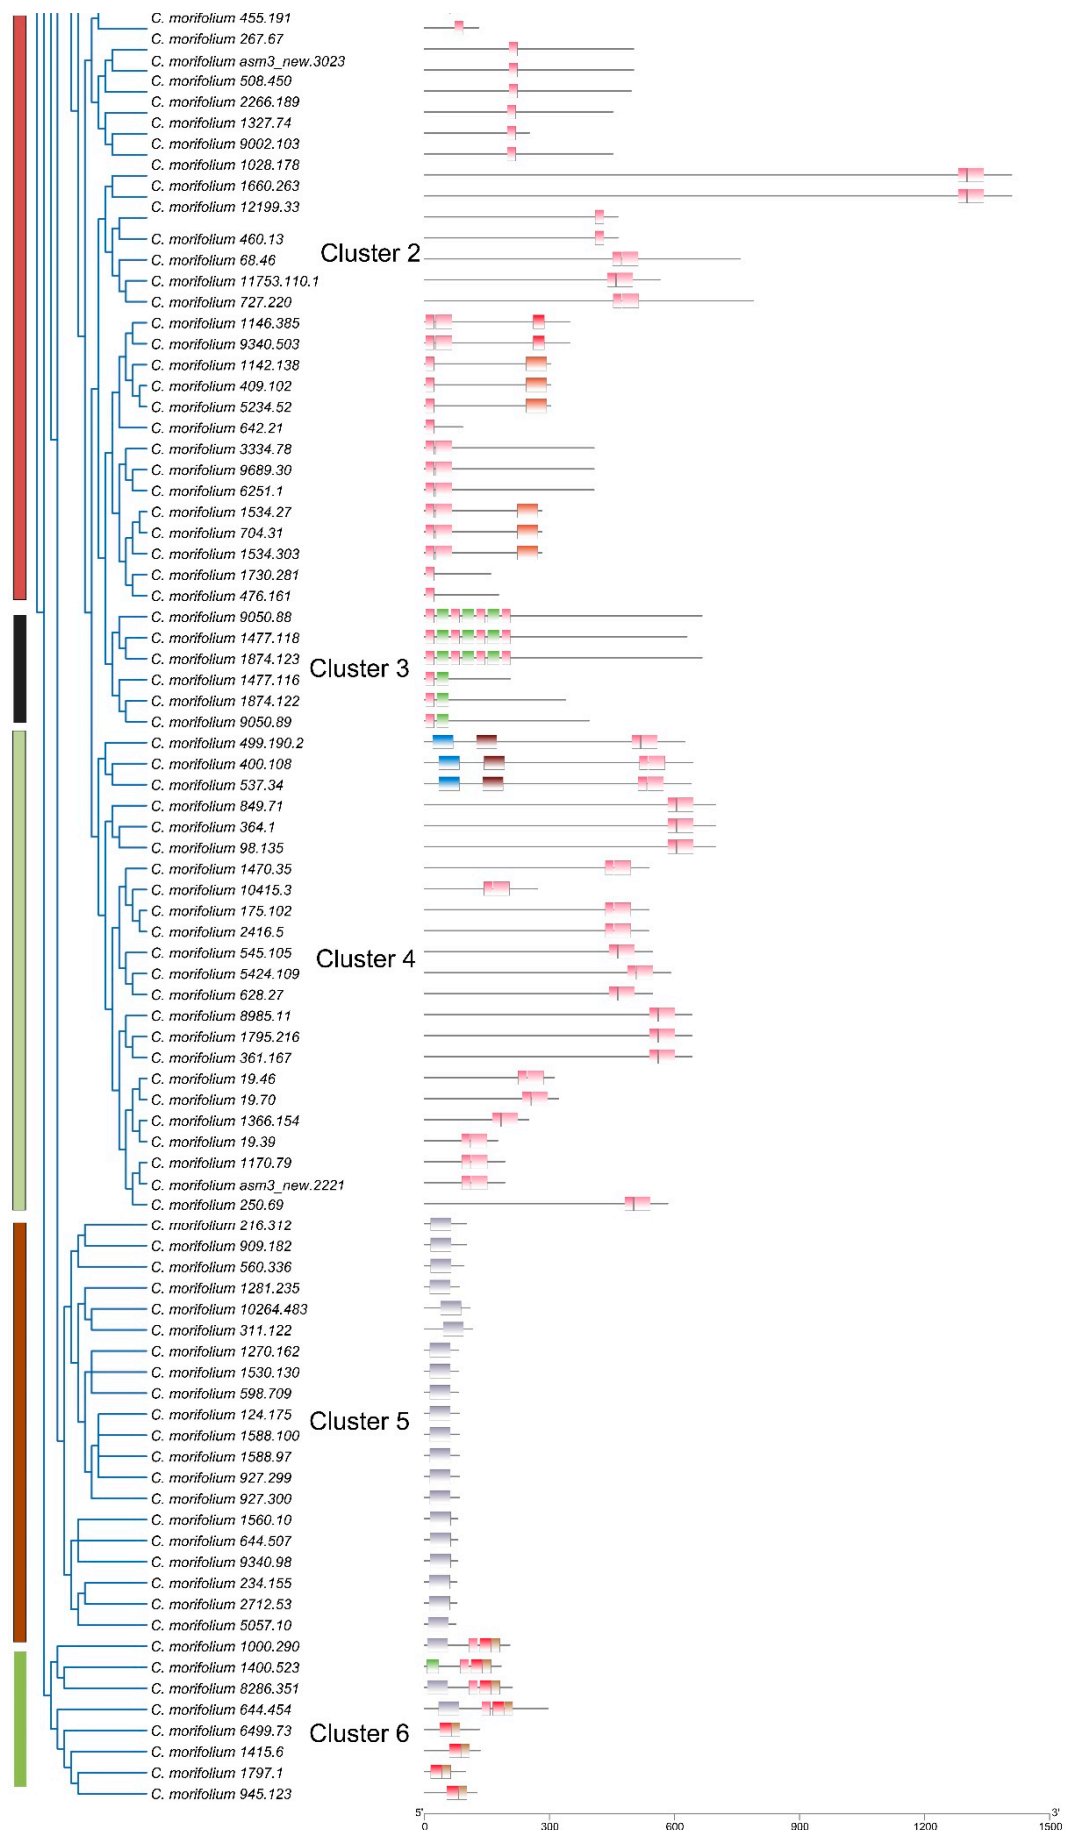

**Figure S6.** Sequence structure analysis of the 1R-MYB subfamily. 14/20 conserved motifs exist in 1R-MYBs.



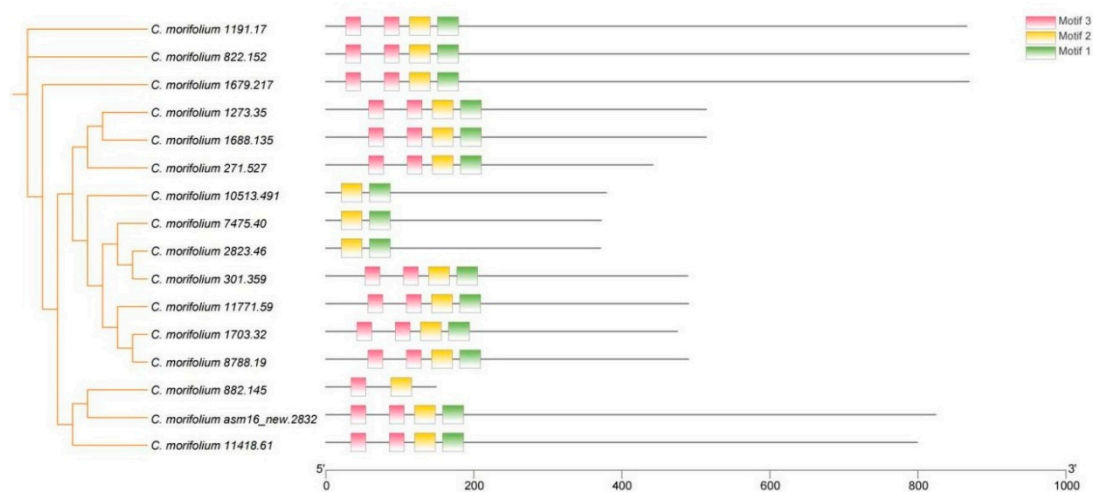

**Figure S7.** Sequence structure analysis of the 3R-MYB subfamily. 3/20 conserved motifs exist in 3R-MYBs.

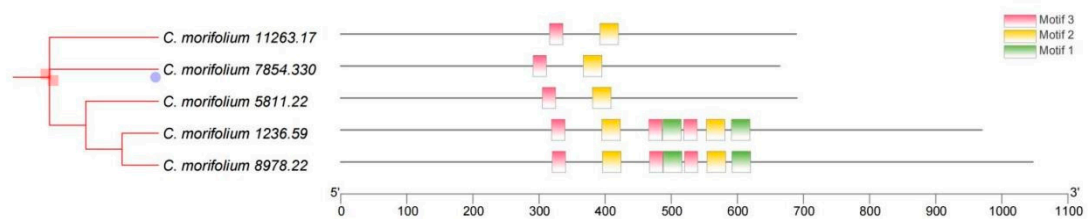

**Figure S8.** Sequence structure analysis of the 4R-MYB subfamily. 3/20 conserved motifs exist in 4R-MYBs.

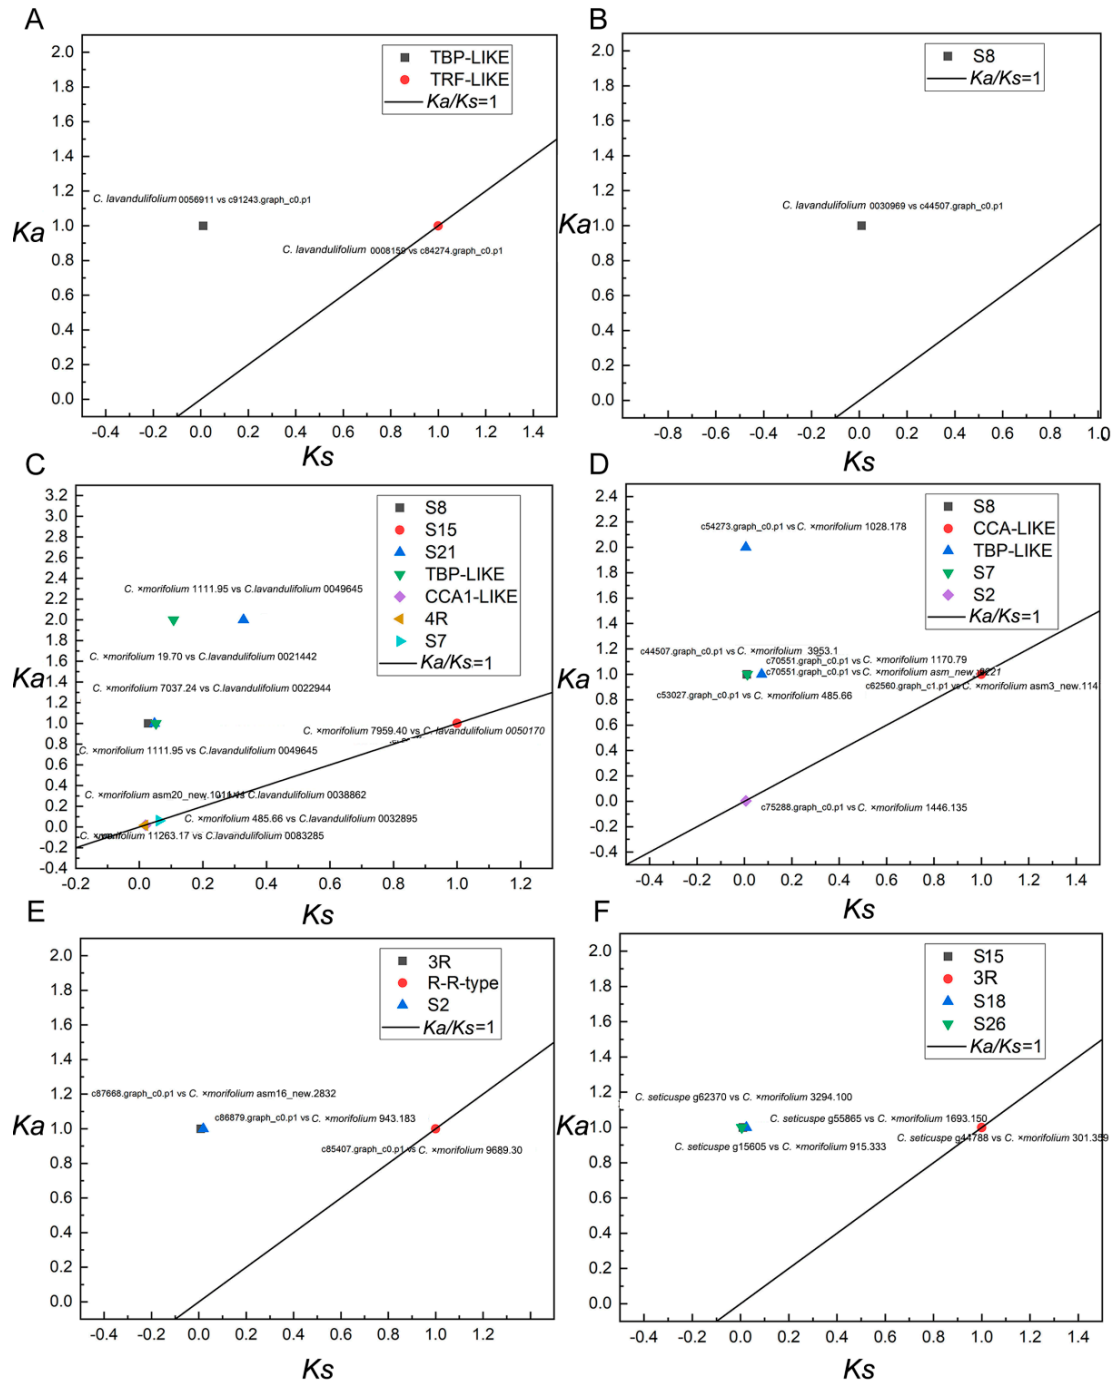

**Figure S9.** Comparative analysis of homologous MYB genes that were subjected to positive selection between *Chrysanthemum* species. (A) *C. lavandulifolium* vs. *C. vestitum*; (B) *C. lavandulifolium* vs. *C. indicum*; (C) *C. lavandulifolium* vs. *C. ×morifolium*; (D) *C. indicum* vs. *C. ×morifolium*; (E) *C. ×morifolium* vs. *C. vestitum*; (F) *C. seticuspe* vs. *C. ×morifolium*. The horizontal and vertical axes represent  $K_s$  and  $K_a$  values, respectively. The  $K_a/K_s$  values of each lineage are marked by different symbols.

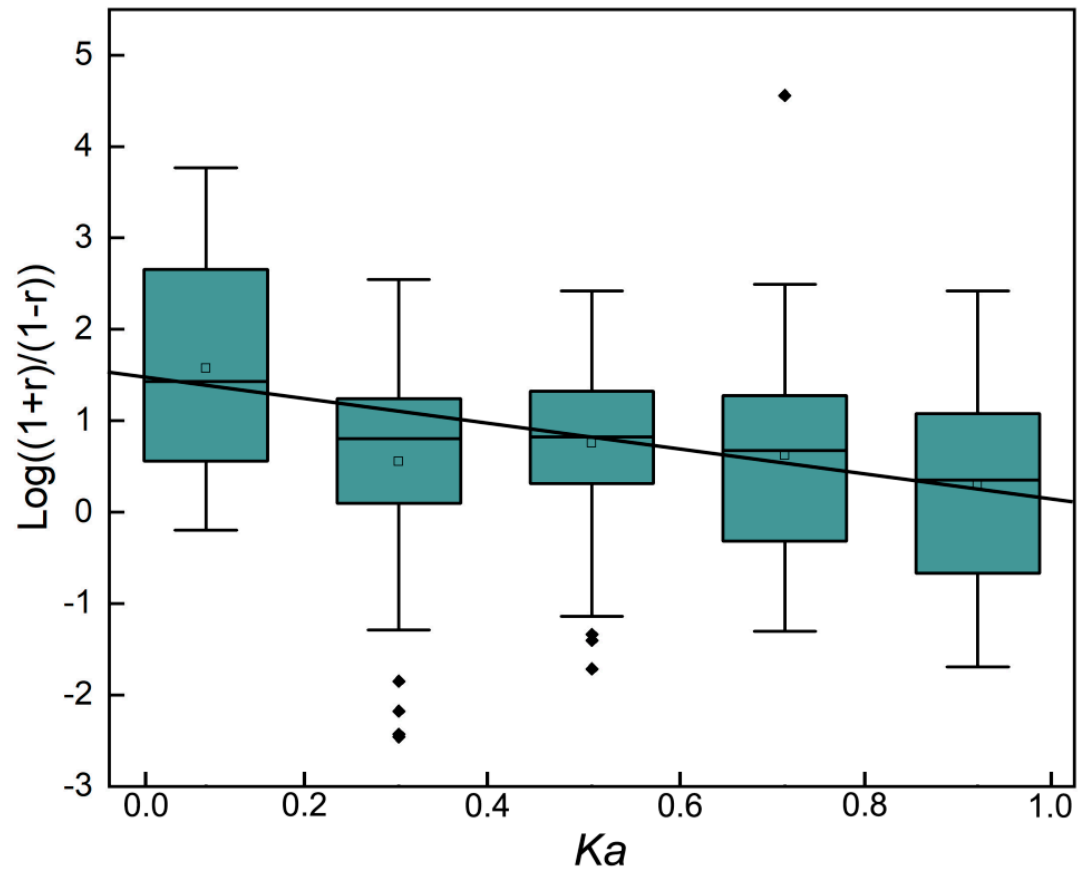

**Figure S10.** Correlations of expression patterns between homologous genes and  $Ka$  values in the *MYB* gene family.  
Fitting function =  $\text{Log} [ (1 + r) / (1 - r) ] = 1.5 - 0.25 \cdot Ka$ .

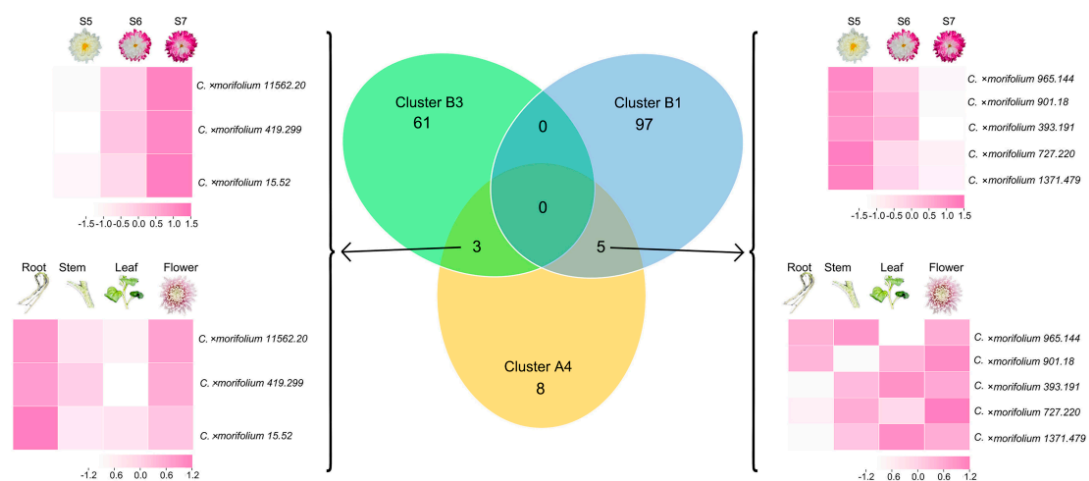

**Figure S11.** The expression of candidate genes that may regulate anthocyanin biosynthesis in *C. x morifolium*. S5, S6, and S7 respectively indicate the early, middle, and late stages of anthocyanin accumulation in the capitulum of the cultivated chrysanthemum 'f23'. Numbers in the Venn diagram indicate gene numbers.

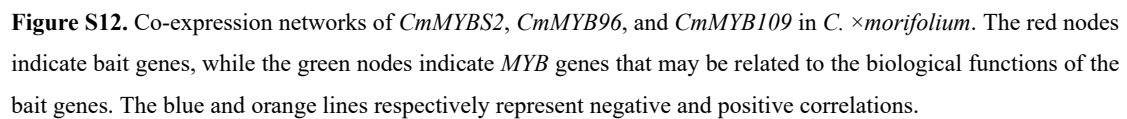

**Figure S12.** Co-expression networks of *CmMYBS2*, *CmMYB96*, and *CmMYB109* in *C. ×morifolium*. The red nodes indicate bait genes, while the green nodes indicate *MYB* genes that may be related to the biological functions of the bait genes. The blue and orange lines respectively represent negative and positive correlations.
