# Supplementary material for: Genome-Wide Analysis of MYB Gene Family in Chrysanthemum ×morifolium Provides Insights into Flower Color Regulation
Source: Plants (Basel). 2024 Apr 28;13(9):1221. doi: 10.3390/plants13091221 (PMC11085527; doi:10.3390/plants13091221)
Supplement: Supplementary file 1 [file plants-13-01221-s001.zip › plants-2956044-supplementary Figures.xlsx]

## Sheet: Table S1
Table S1. Quantitative analysis of the MYB gene family members in Asteraceae species and Arabidopsis thaliana.
	C. seticuspe	C. lavandulifolium	C. ×morifolium	H. annuus	L. sativa	A. thaliana
S1	3	2	18	16	6	5
S2	2	7	40	30	17	3
S3	0	1	4	1	1	4
S4	2	1	6	5	4	7
S5	0	0	0	0	0	1
S6	7	7	34	7	9	5
S7	6	11	40	14	9	3
S8	16	20	72	18	16	7
S9	1	1	3	0	2	2
S10	5	5	13	8	5	4
S11	0	0	0	0	0	5
S12	5	8	25	16	8	7
S13	9	8	32	17	16	6
S14	0	0	0	0	0	4
S15	8	11	24	5	4	3
S16	3	3	10	4	3	2
S17	2	1	13	4	8	7
S18	2	2	6	3	2	3
S19	4	4	19	7	4	6
S20	5	6	22	15	11	9
S21	14	14	48	15	9	4
S22	2	2	7	3	2	3
S23	5	6	28	3	3	3
S24	7	11	13	8	5	7
S25	1	3	18	13	10	2
S26	8	7	30	10	9	6
S27	4	5	14	11	6	6
R2R3-MYB	121	146	539	233	169	124
CCA1-LIKE	8	16	41	49	22	14
CPC-LIKE	3	5	7	4	3	5
I-BOX-BINDING	3	9	20	10	12	6
r-r-TYPE	5	11	39	21	19	7
TBP-LIKE	11	22	47	51	40	11
TRF-LIKE	3	2	8	2	3	2
1R-MYB	33	65	162	137	99	45
3R-MYB	6	6	16	8	11	5
4R-MYB	2	3	5	8	1	1
Total	162	220	722	386	280	175

## Sheet: Table S2
Table S2. The numbers of MYB genes between C. ×morifolium and wild Chrysanthemum species in the Chi-square test.
	1R-MYB, 3R-MYB, and 4R-MYB	R2R3-MYB
C. ×morifolium	183	593
Wild Chrysanthemum species	115	267

## Sheet: Table S3
Table S3. Results of the Chi-square test.
	Value	Number of degrees of freedom	Progressive significance (bilateral)	Precise significance (bilateral)	Precise significance (unilateral)
Pearson's Chi-square (math.)	5.698*	1	0.017	/	/
Continuity correction	5.362	1	0.021	/	/
Likelihood ratio	5.606	1	0.018	/	/
Fisher's exact test	/	/	/	0.018	0.011
Linear correlation	5.693	1	0.017	/	/
Number of active cases	1158	/	/	/	/
* Calculations were performed only for 2 × 2 tables. The groups subjected to the Chi-square test are shown in Supplementary Table S2.

## Sheet: Table S4
Table S4. Pearson correlation coefficient between the numbers of genes and tandem duplicated genes in each MYB lineage (n = 13).
Parameter	Value
Correlation coefficient	0.712
p value	0.006 **
** indicates very significant (p < 0.01).

## Sheet: Table S5
Table S5. Homologous Ka/Ks gene pairs in the MYB gene family among Chrysanthemum species.
Gene id_C. morifolium	Gene id_C. lavandulifolium	Ka/Ks	Lineages	Gene id_C.vestitum	Gene id_C. morifolium	Ka/Ks	Lineages	Gene id_C. indicum	Gene id_C. morifolium	Ka/Ks	Lineages	Gene id_C. seticuspe	Gene id_C. morifolium	Ka/Ks	Lineages	Gene id_C. lavandulifolium	Gene id_C. indicum	Ka/Ks	Lineages	Gene id_C. lavandulifolium	Gene id_C.vestitum	Ka/Ks	Lineages	Gene id_C. lavandulifolium	Gene id_C. makinoi	Ka/Ks	Lineages	Gene id_C. lavandulifolium	Gene id_C. seticuspe	Ka/Ks	Lineages
C. morifolium 7037.24	C. lavandulifolium 0022944	8.53484	TBP-LIKE	c87668.graph_c0.p1	C. morifolium asm16_new.2832	3.6896	TBP-LIKE	c75288.graph_c0.p1	C. morifolium 1446.135	1.93823	S1	C. seticuspe LG2.g55865	C. morifolium 1693.150	1.11571	TBP-LIKE	C. lavandulifolium 0030969	c44507.graph_c0.p1	1.00802	S8	C. lavandulifolium 0056911	c91243.graph_c0.p1	1.91303	S19	C. lavandulifolium 0028629	C. makinoi022609-T1	2.1025	S19	C. lavandulifolium 0038581	C. seticuspe LG4.g46793	1.92795	S19
C. morifolium 7959.40	C. lavandulifolium 0050170	1.54305	TBP-LIKE	c85407.graph_c0.p1	C. morifolium 9689.30	2.85752	TBP-LIKE	c70551.graph_c0.p1	C. morifolium 1170.79	1.59029	S1	C. seticuspe LG5.g44758	C. morifolium 301.359	1.07603	TBP-LIKE	C. lavandulifolium 0008159	c53415.graph_c1.p1	0.908034	TRF-LIKE	C. lavandulifolium 0008159	c84274.graph_c0.p1	1.46374	S1	C. lavandulifolium 0010416	C. makinoi022603-T1	0.894679	S19	C. lavandulifolium 0005019	C. seticuspe LG1.g25308	1.75067	S1
C. morifolium asm20_new.1011	C. lavandulifolium 0038862	1.1897	CCA1-LIKE	c86879.graph_c0.p1	C. morifolium 943.183	1.53829	S2	c70551.graph_c0.p1	C. morifolium asm3_new.2221	1.59029	TBP-LIKE	C. seticuspe LG1.g62370	C. morifolium 3294.100	1.06108	TBP-LIKE	C. lavandulifolium 0009758	c68554.graph_c0.p1	0.867553	S8	C. lavandulifolium 0063912	c95249.graph_c0.p1	0.979932	S8	C. lavandulifolium 0037075	C. makinoi068544-T1	0.888885	S19	C. lavandulifolium 0008159	C. seticuspe LG4.g24284	1.24015	TRF-LIKE
C. morifolium 19.70	C. lavandulifolium 0021442	1.15576	TBP-LIKE	c81471.graph_c1.p1	C. morifolium 1146.385	0.973633	TBP-LIKE	c53027.graph_c0.p1	C. morifolium 485.66	1.56515	S7	C. seticuspe LG8.g15605	C. morifolium 915.333	1.02402	TBP-LIKE	C. lavandulifolium 0012263	c53027.graph_c0.p1	0.843765	S7	C. lavandulifolium 0079801	c97032.graph_c0.p2	0.951751	S7	C. lavandulifolium 0008720	C. makinoi034659-T1	0.879174	S13	C. lavandulifolium 0030728	C. seticuspe LG4.g53319	1.19515	TBP-LIKE
C. morifolium asm20_new.1011	C. lavandulifolium 0008610	1.0913	CCA1-LIKE	c85407.graph_c0.p1	C. morifolium 5860.2	0.904694	TBP-LIKE	c54273.graph_c0.p1	C. morifolium 1028.178	1.22545	TBP-LIKE	C. seticuspe LG8.g05256	C. morifolium 1028.178	0.936226	TBP-LIKE	C. lavandulifolium 0038581	c68480.graph_c0.p1	0.765403	S20	C. lavandulifolium 0014460	c76396.graph_c0.p1	0.936305	S20	C. lavandulifolium 0009758	C. makinoi055679-T1	0.836471	S8	C. lavandulifolium 0038862	C. seticuspe LG1.g30264	1.0759	TBP-LIKE
C. morifolium 11263.17	C. lavandulifolium 0083285	1.05	4R	c41534.graph_c0.p1	C. morifolium 1350.26	0.880357	S4	c62560.graph_c1.p1	C. morifolium asm3_new.1148	1.17835	CCA1-LIKE	C. seticuspe LG4.g24284	C. morifolium 508.450	0.925555	TRF-LIKE	C. lavandulifolium 0088103	c66466.graph_c0.p1	0.750289	3R	C. lavandulifolium 0087270	c93793.graph_c1.p1	0.801555	3R	C. lavandulifolium 0018148	C. makinoi003071-T1	0.810083	S7	C. lavandulifolium 0052647	C. seticuspe LG1.g30264	0.970046	TBP-LIKE
C. morifolium 19.46	C. lavandulifolium 0021442	1.04362	TBP-LIKE	c78307.graph_c0.p1	C. morifolium 3999.192	0.837819	r-r-TYPE	c44507.graph_c0.p1	C. morifolium 3953.1	1.00802	S8	C. seticuspe LG1.g30264	C. morifolium asm20_new.1011	0.902532	CCA1-LIKE	C. lavandulifolium 0049645	c22950.graph_c0.p1	0.717702	S21	C. lavandulifolium 0049645	c78044.graph_c0.p1	0.7809	S21	C. lavandulifolium 0066403	C. makinoi033896-T1	0.804302	CCA1-LIKE	C. lavandulifolium 0037334	C. seticuspe LG5.g09625	0.947745	S13
C. morifolium 485.66	C. lavandulifolium 0032895	1.01553	S7	c74753.graph_c0.p1	C. morifolium 822.155	0.787306	S19	c68554.graph_c0.p1	C. morifolium 1569.96	0.838914	S8	C. seticuspe LG9.g00616	C. morifolium 1742.65	0.902289	S21	C. lavandulifolium 0008124	c42309.graph_c0.p1	0.717559	TBP-LIKE	C. lavandulifolium 0020059	c87668.graph_c0.p1	0.774067	TBP-LIKE	C. lavandulifolium 0018148	C. makinoi003073-T1	0.79287	S7	C. lavandulifolium 0008720	C. seticuspe LG4.g25280	0.929637	S13
C. morifolium 1457.442	C. lavandulifolium 0039343	1.002	TBP-LIKE	c83849.graph_c0.p1	C. morifolium 1111.127	0.766429	S21	c48269.graph_c0.p1	C. morifolium 1525.131	0.815328	S7	C. seticuspe LG3.g37749	C. morifolium 61.299	0.900911	CCA1-LIKE	C. lavandulifolium 0033141	c56135.graph_c0.p2	0.703463	TBP-LIKE	C. lavandulifolium 0088103	c91719.graph_c0.p1	0.724733	TBP-LIKE	C. lavandulifolium 0049645	C. makinoi086453-T1	0.7908	S21	C. lavandulifolium 0080228	C. seticuspe LG3.g37749	0.894404	CCA1-LIKE
C. morifolium 1111.95	C. lavandulifolium 0049645	1.00063	S21	c95288.graph_c1.p1	C. morifolium 2247.36	0.682177	S17	c62217.graph_c0.p1	C. morifolium 1477.116	0.755322	TBP-LIKE	C. seticuspe LG9.g00606	C. morifolium 1742.65	0.884589	S21	C. lavandulifolium 0083279	c65445.graph_c0.p1	0.683513	S7	C. lavandulifolium 0032895	c96820.graph_c0.p1	0.718945	S7	C. lavandulifolium 0048831	C. makinoi048254-T1	0.77042	S17	C. lavandulifolium 0008610	C. seticuspe LG1.g30264	0.865919	CCA1-LIKE
C. morifolium asm20_new.1011	C. lavandulifolium 0052647	0.997968	CCA1-LIKE	c90435.graph_c0.p1	C. morifolium 6033.23	0.658989	S23	c54273.graph_c0.p1	C. morifolium 1660.263	0.746746	TBP-LIKE	C. seticuspe LG2.g00373	C. morifolium 284.105	0.844601	CCA1-LIKE	C. lavandulifolium 0087270	c68423.graph_c0.p1	0.63238	TBP-LIKE	C. lavandulifolium 0068906	c81471.graph_c1.p1	0.678846	TBP-LIKE	C. lavandulifolium 0057511	C. makinoi055152-T1	0.763674	S8	C. lavandulifolium 0028629	C. seticuspe LG2.g55865	0.860108	S15
C. morifolium 1121.21	C. lavandulifolium 0008720	0.989059	S13	c97032.graph_c0.p2	C. morifolium 1366.154	0.648727	TBP-LIKE	c45282.graph_c0.p1	C. morifolium 1279.19	0.740576	CCA1-LIKE	C. seticuspe LG1.g05207	C. morifolium 915.333	0.837422	TBP-LIKE	C. lavandulifolium 0063912	c57895.graph_c1.p1	0.625051	S8	C. lavandulifolium 0010520	c80092.graph_c0.p1	0.677115	S8	C. lavandulifolium 0049645	C. makinoi086403-T1	0.755538	S21	C. lavandulifolium 0033141	C. seticuspe LG5.g47656	0.853809	TBP-LIKE
C. morifolium asm3_new.3246	C. lavandulifolium 0008720	0.972431	S13	c84404.graph_c0.p1	C. morifolium 11816.206	0.599639	r-r-TYPE	c66177.graph_c0.p1	C. morifolium 1874.123	0.715257	TBP-LIKE	C. seticuspe LG4.g18079	C. morifolium 250.532	0.831523	S21	C. lavandulifolium 0046309	c45282.graph_c0.p1	0.617313	CCA1-LIKE	C. lavandulifolium 0052172	c94999.graph_c0.p1	0.675922	CCA1-LIKE	C. lavandulifolium 0020059	C. makinoi062169-T1	0.74995	3R	C. lavandulifolium 0053043	C. seticuspe LG2.g20838	0.840854	S12
C. morifolium 1580.6	C. lavandulifolium 0008720	0.972431	S13	c72822.graph_c0.p1	C. morifolium 1060.13	0.575951	S7	c60226.graph_c0.p1	C. morifolium 1390.83	0.694169	S6	C. seticuspe LG9.g00606	C. morifolium 1111.95	0.830627	S21	C. lavandulifolium 0058528	c50137.graph_c0.p1	0.6151	r-r-TYPE	C. lavandulifolium 0032284	c61665.graph_c0.p1	0.633904	r-r-TYPE	C. lavandulifolium 0008159	C. makinoi034573-T1	0.714155	TRF-LIKE	C. lavandulifolium 0009758	C. seticuspe LG6.g13543	0.831653	S8
C. morifolium 11263.17	C. lavandulifolium 0051627	0.944109	4R	c96820.graph_c0.p1	C. morifolium 485.66	0.562722	S7	c62217.graph_c0.p1	C. morifolium 1874.122	0.685698	TBP-LIKE	C. seticuspe LG8.g50968	C. morifolium 1525.131	0.815328	S7	C. lavandulifolium 0008258	c70551.graph_c0.p1	0.603164	TBP-LIKE	C. lavandulifolium 0066960	c98074.graph_c0.p1	0.618455	TBP-LIKE	C. lavandulifolium 0032284	C. makinoi040801-T1	0.710828	S12	C. lavandulifolium 0052955	C. seticuspe LG2.g36857	0.812827	S13
C. morifolium 19.46	C. lavandulifolium 0000472	0.888436	TBP-LIKE	c76867.graph_c0.p1	C. morifolium 1746.109	0.543381	r-r-TYPE	c22950.graph_c0.p1	C. morifolium 1107.188	0.67696	S21	C. seticuspe LG2.g46655	C. morifolium 1146.385	0.80476	TBP-LIKE	C. lavandulifolium 0064825	c59428.graph_c1.p1	0.601609	CCA1-LIKE	C. lavandulifolium 0042623	c98575.graph_c1.p2	0.595401	CCA1-LIKE	C. lavandulifolium 0063912	C. makinoi022622-T1	0.708283	S8	C. lavandulifolium 0054807	C. seticuspe LG5.g44758	0.785753	3R
C. morifolium 1525.131	C. lavandulifolium 0054308	0.888183	S7	c84274.graph_c0.p1	C. morifolium asm3_new.3023	0.54028	TRF-LIKE	c53384.graph_c0.p1	C. morifolium 9340.503	0.668451	TBP-LIKE	C. seticuspe LG9.g13307	C. morifolium 3601.235	0.783518	S2	C. lavandulifolium 0079801	c70551.graph_c0.p1	0.599171	TBP-LIKE	C. lavandulifolium 0012263	c96820.graph_c0.p1	0.560385	TBP-LIKE	C. lavandulifolium 0039343	C. makinoi024428-T1	0.701945	TBP-LIKE	C. lavandulifolium 0010520	C. seticuspe LG6.g19066	0.780495	TBP-LIKE
C. morifolium 1366.154	C. lavandulifolium 0000472	0.829454	TBP-LIKE	c84274.graph_c0.p1	C. morifolium 267.67	0.54028	TRF-LIKE	c50137.graph_c0.p1	C. morifolium 5738.2	0.640128	r-r-TYPE	C. seticuspe LG6.g19066	C. morifolium 1874.123	0.759587	TBP-LIKE	C. lavandulifolium 0052172	c69842.graph_c0.p1	0.582591	S25	C. lavandulifolium 0057391	c81471.graph_c1.p1	0.544966	S25	C. lavandulifolium 0009758	C. makinoi055683-T1	0.699659	S8	C. lavandulifolium 0087883	C. seticuspe LG2.g44278	0.779341	S8
C. morifolium 485.66	C. lavandulifolium 0012263	0.824035	S7	c79502.graph_c0.p1	C. morifolium 166.115	0.534788	S8	c50137.graph_c0.p1	C. morifolium 1678.244	0.640128	r-r-TYPE	C. seticuspe LG2.g31383	C. morifolium 10513.491	0.756367	3R	C. lavandulifolium 0020059	c57885.graph_c0.p1	0.567275	3R	C. lavandulifolium 0073905	c79502.graph_c0.p1	0.534788	3R	C. lavandulifolium 0070830	C. makinoi092943-T1	0.6963	S26	C. lavandulifolium 0066960	C. seticuspe LG1.g63989	0.758987	4R
C. morifolium 1620.5	C. lavandulifolium 0071055	0.820411	S24	c79502.graph_c0.p1	C. morifolium 1017.261	0.534788	S8	c65445.graph_c0.p1	C. morifolium 1348.248	0.632799	S7	C. seticuspe LG6.g29793	C. morifolium 1694.198	0.755832	S7	C. lavandulifolium 0039071	c54273.graph_c0.p1	0.537539	TBP-LIKE	C. lavandulifolium 0017575	c90435.graph_c0.p1	0.519013	TBP-LIKE	C. lavandulifolium 0023123	C. makinoi036107-T1	0.691193	S18	C. lavandulifolium 0000325	C. seticuspe LG4.g64959	0.755762	S12
C. morifolium 566.171	C. lavandulifolium 0010416	0.800759	S15	c80092.graph_c0.p1	C. morifolium 1477.116	0.533951	TBP-LIKE	c53415.graph_c1.p1	C. morifolium 267.67	0.619419	TRF-LIKE	C. seticuspe LG9.g00616	C. morifolium 1111.95	0.749128	S21	C. lavandulifolium 0066960	c66200.graph_c0.p1	0.535537	4R	C. lavandulifolium 0080533	c90435.graph_c0.p1	0.492713	4R	C. lavandulifolium 0027697	C. makinoi036056-T1	0.688595	S24	C. lavandulifolium 0042623	C. seticuspe LG7.g11832	0.733057	CPC-LIKE
C. morifolium 485.66	C. lavandulifolium 0013253	0.791116	S7	c76396.graph_c1.p1	C. morifolium 1240.38	0.518166	S20	c53415.graph_c1.p1	C. morifolium asm3_new.3023	0.619419	TRF-LIKE	C. seticuspe LG6.g19066	C. morifolium 1477.118	0.74458	TBP-LIKE	C. lavandulifolium 0057606	c34588.graph_c0.p1	0.526888	S10	C. lavandulifolium 0009508	c93077.graph_c0.p1	0.4904	S10	C. lavandulifolium 0017575	C. makinoi031361-T1	0.677829	S23	C. lavandulifolium 0040664	C. seticuspe LG2.g00373	0.715543	CCA1-LIKE
C. morifolium 1670.167	C. lavandulifolium 0076158	0.78931	S19	c72822.graph_c0.p1	C. morifolium 1525.131	0.509022	S7	c48269.graph_c0.p1	C. morifolium 1060.13	0.608214	S7	C. seticuspe LG9.g07275	C. morifolium 250.69	0.737178	TBP-LIKE	C. lavandulifolium 0009486	c72406.graph_c0.p1	0.524674	CPC-LIKE	C. lavandulifolium 0033141	c87897.graph_c0.p1	0.472696	CPC-LIKE	C. lavandulifolium 0004859	C. makinoi088613-T1	0.673206	S13	C. lavandulifolium 0042623	C. seticuspe LG4.g06639	0.704792	CPC-LIKE
C. morifolium 566.197	C. lavandulifolium 0055947	0.767304	S15	c70360.graph_c0.p1	C. morifolium 62.153	0.494104	S2	c63432.graph_c0.p1	C. morifolium 1764.21	0.60465	CCA1-LIKE	C. seticuspe LG4.g01954	C. morifolium 6809.1	0.720227	S23	C. lavandulifolium 0010520	c62217.graph_c0.p1	0.484972	TBP-LIKE	C. lavandulifolium 0005019	c71827.graph_c0.p1	0.461576	TBP-LIKE	C. lavandulifolium 0066960	C. makinoi014083-T1	0.666141	4R	C. lavandulifolium 0057391	C. seticuspe LG2.g46660	0.688006	TBP-LIKE
C. morifolium 1742.65	C. lavandulifolium 0049645	0.765153	S21	c78044.graph_c0.p1	C. morifolium 1111.140	0.482274	S21	c22950.graph_c0.p1	C. morifolium 1111.127	0.586302	S21	C. seticuspe LG2.g50199	C. morifolium 1012.108	0.714106	S19	C. lavandulifolium 0068906	c53384.graph_c0.p1	0.479298	TBP-LIKE	C. lavandulifolium 0039540	c76396.graph_c1.p1	0.451421	TBP-LIKE	C. lavandulifolium 0036744	C. makinoi063254-T1	0.660472	S24	C. lavandulifolium 0012166	C. seticuspe LG8.g12874	0.670258	S10
C. morifolium 19.70	C. lavandulifolium 0000472	0.760273	TBP-LIKE	c61665.graph_c0.p1	C. morifolium 10401.19	0.470696	S12	c57895.graph_c1.p1	C. morifolium 9874.147	0.571881	S8	C. seticuspe LG7.g11832	C. morifolium 468.132	0.707237	CPC-LIKE	C. lavandulifolium 0035609	c41854.graph_c0.p1	0.456977	S20	C. lavandulifolium 0054308	c72822.graph_c0.p1	0.446024	S20	C. lavandulifolium 0049645	C. makinoi086418-T1	0.659712	S21	C. lavandulifolium 0079801	C. seticuspe LG4.g20440	0.66804	TBP-LIKE
C. morifolium 409.102	C. lavandulifolium 0033141	0.75428	TBP-LIKE	c99563.graph_c0.p1	C. morifolium 98.135	0.432765	TBP-LIKE	c72406.graph_c0.p1	C. morifolium 468.132	0.541464	CPC-LIKE	C. seticuspe LG7.g57670	C. morifolium 10513.491	0.691542	3R	C. lavandulifolium 0085245	c51536.graph_c0.p1	0.412122	S27	C. lavandulifolium 0083285	c98074.graph_c0.p1	0.443113	S27	C. lavandulifolium 0042623	C. makinoi066209-T1	0.659436	CPC-LIKE	C. lavandulifolium 0032268	C. seticuspe LG5.g47656	0.662658	TBP-LIKE
C. morifolium 1111.86	C. lavandulifolium 0049645	0.73158	S21	c78307.graph_c0.p1	C. morifolium 1521.97	0.416954	r-r-TYPE	c15703.graph_c0.p1	C. morifolium 960.142	0.538941	S16	C. seticuspe LG2.g46660	C. morifolium 1146.385	0.685432	TBP-LIKE	C. lavandulifolium 0083285	c66200.graph_c0.p1	0.408237	4R	C. lavandulifolium 0008258	c97032.graph_c0.p2	0.420707	4R	C. lavandulifolium 0020059	C. makinoi081242-T1	0.659327	3R	C. lavandulifolium 0060645	C. seticuspe LG8.g03990	0.660632	S8
C. morifolium 9468.14	C. lavandulifolium 0038757	0.722284	TBP-LIKE	c59519.graph_c0.p1	C. morifolium 644.454	0.39824	r-r-TYPE	c35550.graph_c0.p1	C. morifolium 1670.167	0.525665	S19	C. seticuspe LG4.g06639	C. morifolium 468.132	0.683643	CPC-LIKE	C. lavandulifolium 0080793	c56243.graph_c0.p1	0.390313	CCA1-LIKE	C. lavandulifolium 0000503	c59519.graph_c0.p1	0.407056	CCA1-LIKE	C. lavandulifolium 0083285	C. makinoi053681-T1	0.656747	4R	C. lavandulifolium 0008604	C. seticuspe LG4.g25453	0.650144	TRF-LIKE
C. morifolium 500.8	C. lavandulifolium 0009508	0.719614	CCA1-LIKE	c99936.graph_c0.p2	C. morifolium 5424.109	0.39463	TBP-LIKE	c41854.graph_c0.p1	C. morifolium 67.56	0.497195	S20	C. seticuspe LG4.g25453	C. morifolium 9002.103	0.675894	TRF-LIKE	C. lavandulifolium 0046995	c15703.graph_c0.p1	0.370571	S16	C. lavandulifolium 0064825	c97201.graph_c0.p1	0.391168	S16	C. lavandulifolium 0008604	C. makinoi089285-T1	0.650361	TRF-LIKE	C. lavandulifolium 0004859	C. seticuspe LG5.g09634	0.639555	S13
C. morifolium 19.60	C. lavandulifolium 0000472	0.712093	TBP-LIKE	c76867.graph_c0.p1	C. morifolium 804.2	0.360898	r-r-TYPE	c53349.graph_c0.p1	C. morifolium 1478.194	0.488748	S2	C. seticuspe LG1.g25308	C. morifolium asm20_new.504	0.674339	S9	C. lavandulifolium 0018759	c71439.graph_c0.p1	0.3683	TBP-LIKE	C. lavandulifolium 0018759	c99563.graph_c0.p1	0.390603	TBP-LIKE	C. lavandulifolium 0070427	C. makinoi086435-T1	0.646731	S21	C. lavandulifolium 0028629	C. seticuspe LG2.g55902	0.628956	S15
C. morifolium 1366.154	C. lavandulifolium 0001487	0.686758	TBP-LIKE	c76867.graph_c0.p1	C. morifolium 2066.38	0.360898	r-r-TYPE	c53553.graph_c0.p1	C. morifolium 225.632_C. morifolium 225.634	0.478267	CCA1-LIKE	C. seticuspe LG1.g25308	C. morifolium 1210.4	0.674339	S9	C. lavandulifolium 0054308	c48269.graph_c0.p1	0.359484	S7	C. lavandulifolium 0001255	c98703.graph_c1.p1	0.390181	S7	C. lavandulifolium 0080956	C. makinoi073146-T1	0.644355	S6	C. lavandulifolium 0071055	C. seticuspe LG6.g58713	0.617491	S24
C. morifolium 11263.17	C. lavandulifolium 0066960	0.678182	4R	c76867.graph_c0.p1	C. morifolium 2066.40	0.360898	r-r-TYPE	c57885.graph_c0.p1	C. morifolium asm16_new.2832	0.474979	3R	C. seticuspe LG6.g26175	C. morifolium 10779.65	0.65894	S26	C. lavandulifolium 0033158	c55762.graph_c0.p1	0.352885	S8	C. lavandulifolium 0038581	c84235.graph_c0.p1	0.369107	S8	C. lavandulifolium 0066960	C. makinoi014110-T1	0.635202	4R	C. lavandulifolium 0000503	C. seticuspe LG2.g48689	0.611452	r-r-TYPE
C. morifolium 11753.110.1	C. lavandulifolium 0008124	0.676948	TBP-LIKE	c76867.graph_c0.p1	C. morifolium 2066.42	0.360898	r-r-TYPE	c41854.graph_c0.p1	C. morifolium 463.214	0.46478	S20	C. seticuspe LG4.g33997	C. morifolium 1798.23	0.649438	S27	C. lavandulifolium 0008551	c60226.graph_c0.p1	0.352285	S6	C. lavandulifolium 0081873	c52018.graph_c0.p1	0.367649	S6	C. lavandulifolium 0008604	C. makinoi034734-T1	0.630391	TRF-LIKE	C. lavandulifolium 0081873	C. seticuspe LG6.g00107	0.591007	S3
C. morifolium 1366.81	C. lavandulifolium 0047497	0.676555	S8	c78062.graph_c0.p1	C. morifolium 1477.116	0.355079	TBP-LIKE	c59428.graph_c1.p1	C. morifolium 1371.650	0.45873	CCA1-LIKE	C. seticuspe LG4.g01954	C. morifolium 1373.17	0.63198	S23	C. lavandulifolium 0020059	c60549.graph_c0.p1	0.321668	3R	C. lavandulifolium 0031975	c62112.graph_c0.p1	0.365161	3R	C. lavandulifolium 0032495	C. makinoi008852-T1	0.62274	TBP-LIKE	C. lavandulifolium 0065456	C. seticuspe LG7.g27228	0.589072	S24
C. morifolium 1028.178	C. lavandulifolium 0039071	0.676387	TBP-LIKE	c97201.graph_c0.p1	C. morifolium 1371.650	0.352103	CCA1-LIKE	c55762.graph_c0.p1	C. morifolium 733.201	0.393181	S8	C. seticuspe LG2.g55931	C. morifolium 566.171	0.620336	S15	C. lavandulifolium 0030969	c54274.graph_c0.p1	0.299189	S8	C. lavandulifolium 0055426	c93170.graph_c0.p1	0.346424	S8	C. lavandulifolium 0081873	C. makinoi052282-T1	0.618888	S3	C. lavandulifolium 0037061	C. seticuspe LG6.g19066	0.556276	TBP-LIKE
C. morifolium 1390.88	C. lavandulifolium 0080956	0.672735	S6	c91946.graph_c0.p1	C. morifolium 9750.1	0.349759	S2	c63850.graph_c0.p1	C. morifolium 1874.122	0.376582	TBP-LIKE	C. seticuspe LG1.g28057	C. morifolium 1046.43	0.612284	S8	C. lavandulifolium 0042278	c60011.graph_c0.p1	0.298447	CCA1-LIKE	C. lavandulifolium 0037061	c80092.graph_c0.p1	0.336086	CCA1-LIKE	C. lavandulifolium 0010520	C. makinoi039278-T1	0.611863	TBP-LIKE	C. lavandulifolium 0008604	C. seticuspe LG7.g48462	0.539085	TRF-LIKE
C. morifolium 1142.138	C. lavandulifolium 0033141	0.664467	TBP-LIKE	c84235.graph_c0.p1	C. morifolium 24.248	0.344081	S20	c45832.graph_c0.p1	C. morifolium 943.183	0.363485	S2	C. seticuspe LG4.g25453	C. morifolium 1327.74	0.608543	TRF-LIKE	C. lavandulifolium 0059294	c19271.graph_c0.p1	0.292921	I-BOX-BINGDING	C. lavandulifolium 0075515	c88996.graph_c0.p1	0.319253	I-BOX-BINGDING	C. lavandulifolium 0080533	C. makinoi031361-T1	0.582409	S23	C. lavandulifolium 0063810	C. seticuspe LG9.g07619	0.532554	S8
C. morifolium asm16_new.2832	C. lavandulifolium 0020059	0.659327	3R	c62112.graph_c0.p1	C. morifolium 7588.92	0.343168	S24	c51536.graph_c0.p1	C. morifolium 1617.120	0.363253	S27	C. seticuspe LG8.g50968	C. morifolium 1060.13	0.608214	S7	C. lavandulifolium 0030969	c40190.graph_c0.p1	0.292764	S8	C. lavandulifolium 0054807	c82337.graph_c0.p1	0.318088	S8	C. lavandulifolium 0009508	C. makinoi090029-T1	0.574606	CCA1-LIKE	C. lavandulifolium 0031847	C. seticuspe LG4.g38592	0.532025	S26
C. morifolium 5811.22	C. lavandulifolium 0066960	0.656597	4R	c79537.graph_c1.p1	C. morifolium 987.409	0.34133	S12	c54606.graph_c0.p1	C. morifolium 1503.29	0.346435	S20	C. seticuspe LG3.g46111	C. morifolium 6251.1	0.606679	r-r-TYPE	C. lavandulifolium 0050349	c52748.graph_c0.p1	0.284839	S23	C. lavandulifolium 0020059	c90982.graph_c0.p1	0.309795	S23	C. lavandulifolium 0075515	C. makinoi086435-T1	0.550332	S21	C. lavandulifolium 0016360	C. seticuspe LG6.g19066	0.531429	TBP-LIKE
C. morifolium 1366.154	C. lavandulifolium 0021442	0.654056	TBP-LIKE	c84664.graph_c0.p1	C. morifolium 733.201	0.32302	S8	c69842.graph_c0.p1	C. morifolium 1279.179	0.344545	S25	C. seticuspe LG9.g00630	C. morifolium 915.333	0.596162	TBP-LIKE	C. lavandulifolium 0030969	c59388.graph_c0.p1	0.282172	S8	C. lavandulifolium 0046995	c47167.graph_c0.p1	0.296859	S8	C. lavandulifolium 0027319	C. makinoi013646-T1	0.547323	TBP-LIKE	C. lavandulifolium 0068325	C. seticuspe LG4.g56778	0.528531	S1
C. morifolium 19.60	C. lavandulifolium 0001487	0.651368	TBP-LIKE	c88996.graph_c0.p1	C. morifolium 419.299	0.319253	S21	c63850.graph_c0.p1	C. morifolium 1477.116	0.31174	TBP-LIKE	C. seticuspe LG7.g48462	C. morifolium 1327.74	0.589064	TRF-LIKE	C. lavandulifolium 0029612	c63432.graph_c0.p1	0.278916	CCA1-LIKE	C. lavandulifolium 0051580	c15179.graph_c0.p1	0.287706	CCA1-LIKE	C. lavandulifolium 0050170	C. makinoi022616-T1	0.546748	S15	C. lavandulifolium 0043642	C. seticuspe LG6.g58713	0.525142	S24
C. morifolium 1457.400	C. lavandulifolium 0000325	0.629186	S12	c87213.graph_c0.p1	C. morifolium 10628.169	0.318417	S10	c65519.graph_c0.p1	C. morifolium 901.18	0.302096	r-r-TYPE	C. seticuspe LG5.g63791	C. morifolium 1534.303	0.584482	TBP-LIKE	C. lavandulifolium 0076158	c48861.graph_c0.p1	0.275275	S19	C. lavandulifolium 0004670	c99293.graph_c0.p2	0.28426	S19	C. lavandulifolium 0087956	C. makinoi013643-T1	0.541043	TBP-LIKE	C. lavandulifolium 0088390	C. seticuspe LG4.g16230	0.522616	S15
C. morifolium 19.46	C. lavandulifolium 0001487	0.623666	TBP-LIKE	c93077.graph_c0.p1	C. morifolium 10592.64	0.313794	CCA1-LIKE	c56135.graph_c0.p2	C. morifolium 409.102	0.289153	TBP-LIKE	C. seticuspe LG6.g00107	C. morifolium 4355.28	0.574257	S3	C. lavandulifolium 0049242	c69167.graph_c0.p1	0.270076	S22	C. lavandulifolium 0033158	c84664.graph_c0.p1	0.280468	S22	C. lavandulifolium 0054807	C. makinoi089949-T1	0.540281	3R	C. lavandulifolium 0051681	C. seticuspe LG9.g13307	0.521542	S2
C. morifolium 590.90	C. lavandulifolium 0009508	0.621527	CCA1-LIKE	c81885.graph_c0.p1	C. morifolium 3601.235	0.31123	S2	c71558.graph_c1.p2	C. morifolium 1425.175	0.286846	CCA1-LIKE	C. seticuspe LG6.g13561	C. morifolium 1763.17	0.562112	S8	C. lavandulifolium 0008258	c70592.graph_c1.p2	0.26644	TBP-LIKE	C. lavandulifolium 0007167	c70366.graph_c0.p1	0.277171	TBP-LIKE	C. lavandulifolium 0052647	C. makinoi008852-T1	0.539339	TBP-LIKE	C. lavandulifolium 0049645	C. seticuspe LG9.g00616	0.509311	S21
C. morifolium 301.359	C. lavandulifolium 0054807	0.62131	3R	c82031.graph_c0.p1	C. morifolium 642.21	0.311116	TBP-LIKE	c56621.graph_c0.p1	C. morifolium 1000.290	0.282798	r-r-TYPE	C. seticuspe LG2.g48689	C. morifolium 644.454	0.560274	r-r-TYPE	C. lavandulifolium 0040664	c71558.graph_c1.p2	0.265538	CCA1-LIKE	C. lavandulifolium 0008551	c83283.graph_c0.p1	0.275656	CCA1-LIKE	C. lavandulifolium 0071055	C. makinoi061518-T1	0.537381	S24	C. lavandulifolium 0017575	C. seticuspe LG4.g01954	0.486074	S23
C. morifolium 1620.5	C. lavandulifolium 0043642	0.612725	S24	c98111.graph_c0.p1	C. morifolium 1477.116	0.308586	TBP-LIKE	c13917.graph_c0.p1	C. morifolium 1798.23	0.262155	S27	C. seticuspe LG7.g48462	C. morifolium 9002.103	0.553776	TRF-LIKE	C. lavandulifolium 0010520	c66177.graph_c0.p1	0.262888	TBP-LIKE	C. lavandulifolium 0053513	c79395.graph_c0.p1	0.262928	TBP-LIKE	C. lavandulifolium 0038862	C. makinoi008852-T1	0.531079	TBP-LIKE	C. lavandulifolium 0070427	C. seticuspe LG3.g24085	0.485386	S21
C. morifolium 5811.22	C. lavandulifolium 0051627	0.61105	4R	c98074.graph_c0.p1	C. morifolium 1236.59	0.305873	4R	c71439.graph_c0.p1	C. morifolium 849.71	0.26078	TBP-LIKE	C. seticuspe LG6.g46886	C. morifolium 1679.315	0.525773	S19	C. lavandulifolium 0039540	c54606.graph_c0.p1	0.259539	S20	C. lavandulifolium 0003766	c79835.graph_c1.p1	0.25844	S20	C. lavandulifolium 0050303	C. makinoi046871-T1	0.530357	S8	C. lavandulifolium 0070830	C. seticuspe LG9.g21805	0.481145	S26
C. morifolium 409.102	C. lavandulifolium 0032268	0.603865	TBP-LIKE	c72153.graph_c0.p1	C. morifolium 1730.281	0.300844	TBP-LIKE	c70592.graph_c1.p2	C. morifolium 628.27	0.25908	TBP-LIKE	C. seticuspe LG6.g46886	C. morifolium 822.22	0.525773	S19	C. lavandulifolium 0061646	c49286.graph_c0.p1	0.250819	S26	C. lavandulifolium 0051681	c81885.graph_c0.p1	0.256141	S26	C. lavandulifolium 0087270	C. makinoi056442-T1	0.521756	TBP-LIKE	C. lavandulifolium 0030969	C. seticuspe LG2.g25945	0.473567	S8
C. morifolium 1142.138	C. lavandulifolium 0032268	0.599828	TBP-LIKE	c76926.graph_c0.p1	C. morifolium 1454.215	0.300349	S21	c70117.graph_c0.p1	C. morifolium 19.114	0.237385	S25	C. seticuspe LG2.g44278	C. morifolium 1566.29	0.519623	S8	C. lavandulifolium 0055426	c61971.graph_c0.p1	0.244367	S10	C. lavandulifolium 0014310	c99198.graph_c0.p1	0.254995	S10	C. lavandulifolium 0001561	C. makinoi019029-T1	0.514734	S8	C. lavandulifolium 0008551	C. seticuspe LG3.g24533	0.469692	S6
C. morifolium 1198.339	C. lavandulifolium 0057804	0.598879	S7	c77802.graph_c0.p1	C. morifolium 216.61	0.299776	r-r-TYPE	c52748.graph_c0.p1	C. morifolium 957.10	0.236594	S23	C. seticuspe LG9.g21805	C. morifolium 155.19	0.517692	S26	C. lavandulifolium 0007167	c48042.graph_c0.p1	0.235925	S13	C. lavandulifolium 0029612	c76298.graph_c0.p1	0.246115	S13	C. lavandulifolium 0046465	C. makinoi056904-T1	0.514337	CCA1-LIKE	C. lavandulifolium 0014618	C. seticuspe LG9.g19405	0.46765	S24
C. morifolium 19.70	C. lavandulifolium 0001487	0.589308	TBP-LIKE	c98575.graph_c1.p2	C. morifolium 342.129	0.299027	CPC-LIKE	c68480.graph_c0.p1	C. morifolium 24.248	0.230492	S20	C. seticuspe LG7.g72480	C. morifolium 1390.83	0.516168	S6	C. lavandulifolium 0087886	c70117.graph_c0.p1	0.233078	S25	C. lavandulifolium 0014772	c94130.graph_c0.p1	0.243773	S25	C. lavandulifolium 0013253	C. makinoi031416-T1	0.513061	S7	C. lavandulifolium 0064449	C. seticuspe LG9.g07633	0.463247	S8
C. morifolium 1534.303	C. lavandulifolium 0050218	0.58903	TBP-LIKE	c90982.graph_c0.p1	C. morifolium 1679.217	0.297948	3R	c68880.graph_c1.p1	C. morifolium 1124.237	0.215335	S20	C. seticuspe LG9.g00680	C. morifolium 915.333	0.515778	TBP-LIKE	C. lavandulifolium 0052955	c52043.graph_c0.p1	0.224916	S13	C. lavandulifolium 0038022	c70360.graph_c0.p1	0.241191	S13	C. lavandulifolium 0014460	C. makinoi028842-T1	0.506031	S10	C. lavandulifolium 0057606	C. seticuspe LG8.g12874	0.459569	S10
C. morifolium 1146.385	C. lavandulifolium 0057391	0.585316	TBP-LIKE	c91243.graph_c0.p1	C. morifolium 1470.35	0.297814	TBP-LIKE	c58282.graph_c0.p1	C. morifolium 3601.235	0.214199	S2	C. seticuspe LG5.g09634	C. morifolium 1085.78	0.51061	S13	C. lavandulifolium 0014446	c36306.graph_c0.p1	0.216115	S21	C. lavandulifolium 0036281	c70360.graph_c0.p1	0.241191	S21	C. lavandulifolium 0008124	C. makinoi027652-T1	0.503987	TBP-LIKE	C. lavandulifolium 0087956	C. seticuspe LG1.g62370	0.457517	TBP-LIKE
C. morifolium 1817.271	C. lavandulifolium 0052172	0.583738	S25	c82850.graph_c0.p1	C. morifolium 11506.109	0.27577	S24	c59388.graph_c0.p1	C. morifolium 1757.40	0.202455	S4	C. seticuspe LG4.g37128	C. morifolium 463.214	0.483322	S20	C. lavandulifolium 0070115	c60011.graph_c0.p1	0.21106	CCA1-LIKE	C. lavandulifolium 0046746	c85407.graph_c0.p1	0.237392	CCA1-LIKE	C. lavandulifolium 0049645	C. makinoi086415-T1	0.503443	S21	C. lavandulifolium 0032495	C. seticuspe LG1.g30264	0.448931	TBP-LIKE
C. morifolium 19.60	C. lavandulifolium 0021442	0.580228	TBP-LIKE	c81625.graph_c0.p1	C. morifolium 2432.15	0.273279	S2	c59388.graph_c0.p1	C. morifolium 518.474	0.202455	S4	C. seticuspe LG8.g47932	C. morifolium 2066.40	0.47249	r-r-TYPE	C. lavandulifolium 0079917	c59388.graph_c0.p2	0.209366	S4	C. lavandulifolium 0033008	c81625.graph_c0.p1	0.235849	S4	C. lavandulifolium 0055947	C. makinoi022616-T1	0.500785	S15	C. lavandulifolium 0068906	C. seticuspe LG2.g46660	0.441116	TBP-LIKE
C. morifolium 1795.216	C. lavandulifolium 0087270	0.578097	TBP-LIKE	c47167.graph_c0.p1	C. morifolium 381.129	0.257309	S16	c60011.graph_c0.p1	C. morifolium 393.6	0.198236	CCA1-LIKE	C. seticuspe LG8.g47932	C. morifolium 2066.38	0.47249	r-r-TYPE	C. lavandulifolium 0003766	c55223.graph_c0.p1	0.206742	S27	C. lavandulifolium 0085245	c77909.graph_c0.p1	0.229968	S27	C. lavandulifolium 0073621	C. makinoi084919-T1	0.499426	CCA1-LIKE	C. lavandulifolium 0083285	C. seticuspe LG1.g63989	0.439442	4R
C. morifolium 225.632_C. morifolium 225.634	C. lavandulifolium 0029612	0.572621	CCA1-LIKE	c83283.graph_c0.p1	C. morifolium 212.89	0.251672	S6	c60011.graph_c0.p1	C. morifolium 248.19	0.198236	CCA1-LIKE	C. seticuspe LG6.g47382	C. morifolium 1191.17	0.466676	3R	C. lavandulifolium 0008604	c68276.graph_c0.p1	0.19212	TRF-LIKE	C. lavandulifolium 0052955	c76098.graph_c0.p1	0.225186	TRF-LIKE	C. lavandulifolium 0054308	C. makinoi081212-T1	0.498745	S7	C. lavandulifolium 0042820	C. seticuspe LG1.g45488	0.435612	S15
C. morifolium 6033.33	C. lavandulifolium 0080533	0.565617	S23	c81420.graph_c0.p1	C. morifolium 1474.81	0.25152	S7	c43577.graph_c1.p1	C. morifolium 1386.67	0.194245	S25	C. seticuspe LG8.g05256	C. morifolium 1660.263	0.464797	TBP-LIKE	C. lavandulifolium 0012166	c34588.graph_c0.p1	0.19065	S10	C. lavandulifolium 0069640	c86508.graph_c0.p1	0.221866	S10	C. lavandulifolium 0054807	C. makinoi006368-T1	0.487955	3R	C. lavandulifolium 0081445	C. seticuspe LG9.g30332	0.433165	S23
C. morifolium 271.527	C. lavandulifolium 0088103	0.560946	3R	c98703.graph_c1.p1	C. morifolium 12199.33	0.249699	TBP-LIKE	c52439.graph_c0.p1	C. morifolium 2432.15	0.193483	S2	C. seticuspe LG3.g24533	C. morifolium 1230.347	0.455446	S6	C. lavandulifolium 0009508	c62560.graph_c1.p1	0.19044	CCA1-LIKE	C. lavandulifolium 0056911	c99936.graph_c0.p2	0.221125	CCA1-LIKE	C. lavandulifolium 0041510	C. makinoi022603-T1	0.484407	S15	C. lavandulifolium 0004670	C. seticuspe LG4.g07625	0.424795	r-r-TYPE
C. morifolium 1446.79	C. lavandulifolium 0014460	0.556148	S10	c76298.graph_c0.p1	C. morifolium 225.632_C. morifolium 225.634	0.247796	CCA1-LIKE	c36306.graph_c0.p1	C. morifolium 3574.22	0.191486	S20	C. seticuspe LG3.g41484	C. morifolium 1012.108	0.451694	S19	C. lavandulifolium 0051681	c58282.graph_c0.p1	0.182529	S2	C. lavandulifolium 0014460	c87213.graph_c0.p1	0.22102	S2	C. lavandulifolium 0055211	C. makinoi086906-T1	0.482423	S22	C. lavandulifolium 0036457	C. seticuspe LG2.g32400	0.417929	CCA1-LIKE
C. morifolium 901.18	C. lavandulifolium 0044716	0.553104	r-r-TYPE	c89024.graph_c1.p1	C. morifolium 9002.103	0.244654	TRF-LIKE	c55521.graph_c0.p1	C. morifolium 4775.84	0.190784	S21	C. seticuspe LG9.g07633	C. morifolium 19.4	0.451462	S8	C. lavandulifolium 0033008	c52439.graph_c0.p1	0.179123	S2	C. lavandulifolium 0047497	c69328.graph_c0.p1	0.217585	S2	C. lavandulifolium 0030969	C. makinoi046871-T1	0.478106	S8	C. lavandulifolium 0087270	C. seticuspe LG9.g07275	0.409935	TBP-LIKE
C. morifolium 1463.15	C. lavandulifolium 0064825	0.55138	CCA1-LIKE	c82850.graph_c0.p1	C. morifolium 1180.393	0.243501	S24	c68276.graph_c0.p1	C. morifolium 9002.103	0.188861	TRF-LIKE	C. seticuspe LG9.g07619	C. morifolium 19.4	0.439896	S8	C. lavandulifolium 0030969	c53349.graph_c0.p1	0.158984	S8	C. lavandulifolium 0057804	c74752.graph_c0.p1	0.216773	S8	C. lavandulifolium 0049645	C. makinoi086450-T1	0.475166	S21	C. lavandulifolium 0017575	C. seticuspe LG4.g02022	0.405917	S23
C. morifolium 1569.108	C. lavandulifolium 0009758	0.548613	S8	c90982.graph_c0.p1	C. morifolium 1191.17	0.242749	3R	c71558.graph_c1.p2	C. morifolium 284.105	0.187754	CCA1-LIKE	C. seticuspe LG6.g00131	C. morifolium 857.27_C. morifolium 857.28	0.422833	S3	C. lavandulifolium 0014460	c34588.graph_c0.p1	0.135059	S10	C. lavandulifolium 0014460	c79537.graph_c1.p1	0.21231	S10	C. lavandulifolium 0030850	C. makinoi093883-T1	0.474274	S2	C. lavandulifolium 0059827	C. seticuspe LG1.g55809	0.405427	S13
C. morifolium 4095.45	C. lavandulifolium 0081445	0.544573	S23	c89417.graph_c0.p1	C. morifolium 7863.5	0.230184	S20	c56662.graph_c0.p1	C. morifolium 15.52	0.186348	S21	C. seticuspe LG6.g13543	C. morifolium 1569.96	0.418161	S8	C. lavandulifolium 0012900	c34588.graph_c0.p1	0.134238	S10	C. lavandulifolium 0069459	c78307.graph_c0.p1	0.206512	S10	C. lavandulifolium 0049090	C. makinoi031374-T1	0.469434	S23	C. lavandulifolium 0031975	C. seticuspe LG3.g30148	0.396704	S24
C. morifolium 250.69	C. lavandulifolium 0079801	0.542932	TBP-LIKE	c52018.graph_c0.p1	C. morifolium 2161.7	0.223571	S3	c48042.graph_c0.p1	C. morifolium 533.239	0.175049	S13	C. seticuspe LG2.g55902	C. morifolium 1693.144	0.417355	S15	C. lavandulifolium 0001255	c59490.graph_c0.p1	0.123112	TBP-LIKE	C. lavandulifolium 0071410	c93793.graph_c1.p1	0.205449	TBP-LIKE	C. lavandulifolium 0027704	C. makinoi030436-T1	0.46835	3R	C. lavandulifolium 0080533	C. seticuspe LG4.g01954	0.386695	S23
C. morifolium 250.69	C. lavandulifolium 0008258	0.542027	TBP-LIKE	c81625.graph_c0.p1	C. morifolium 1005.271	0.217775	S2	c52439.graph_c0.p1	C. morifolium 1005.271	0.168629	S2	C. seticuspe LG4.g45272	C. morifolium 11263.17	0.414511	4R	C. lavandulifolium 0054519	c42410.graph_c0.p1	0.100396	r-r-TYPE	C. lavandulifolium 0023763	c81420.graph_c0.p1	0.204474	r-r-TYPE	C. lavandulifolium 0008604	C. makinoi031195-T1	0.462962	TRF-LIKE	C. lavandulifolium 0031769	C. seticuspe LG6.g58713	0.386368	S24
C. morifolium 3601.235	C. lavandulifolium 0030850	0.539551	S2	c94999.graph_c0.p1	C. morifolium 61.158	0.216038	S25	c55223.graph_c0.p1	C. morifolium 11771.308	0.164599	S27	C. seticuspe LG6.g20415	C. morifolium 1693.144	0.410401	S15	C. lavandulifolium 0069459	c42410.graph_c0.p1	0.0916474	r-r-TYPE	C. lavandulifolium 0012166	c72337.graph_c0.p1	0.199032	r-r-TYPE	C. lavandulifolium 0039071	C. makinoi082837-T1	0.460164	TBP-LIKE	C. lavandulifolium 0050218	C. seticuspe LG5.g63791	0.385001	TBP-LIKE
C. morifolium 1457.400	C. lavandulifolium 0032284	0.522318	S12	c72337.graph_c0.p1	C. morifolium 6658.49	0.213982	S10	c68455.graph_c0.p1	C. morifolium 1124.237	0.156194	S20	C. seticuspe LG2.g20838	C. morifolium 8830.58	0.404699	S12	C. lavandulifolium 0073975	c66200.graph_c0.p1	0.0685316	4R	C. lavandulifolium 0049242	c92674.graph_c0.p1	0.198461	4R	C. lavandulifolium 0057804	C. makinoi088326-T1	0.458294	S7	C. lavandulifolium 0039343	C. seticuspe LG3.g46111	0.381465	TBP-LIKE
C. morifolium 3601.235	C. lavandulifolium 0051681	0.521498	S2	c69328.graph_c0.p1	C. morifolium 1760.242	0.213923	S8	c56135.graph_c0.p2	C. morifolium 5234.52	0.154135	TBP-LIKE	C. seticuspe LG2.g55880	C. morifolium 1693.144	0.401895	S15	C. lavandulifolium 0033110	c58519.graph_c0.p1	0.0682627	r-r-TYPE	C. lavandulifolium 0040664	c91706.graph_c0.p2	0.195071	r-r-TYPE	C. lavandulifolium 0004670	C. makinoi032314-T1	0.458076	r-r-TYPE	C. lavandulifolium 0056132	C. seticuspe LG1.g12127	0.378536	S7
C. morifolium 1566.29	C. lavandulifolium 0087883	0.516765	S8	c82850.graph_c0.p1	C. morifolium 1431.102	0.213809	S24	c70592.graph_c1.p2	C. morifolium 545.105	0.153274	TBP-LIKE	C. seticuspe LG1.g12103	C. morifolium 1348.248	0.401007	S7	C. lavandulifolium 0069459	c42257.graph_c0.p1	0.0545	r-r-TYPE	C. lavandulifolium 0008604	c89024.graph_c1.p1	0.1911	r-r-TYPE	C. lavandulifolium 0023123	C. makinoi036108-T1	0.450802	S18	C. lavandulifolium 0049645	C. seticuspe LG9.g00606	0.377477	S21
C. morifolium 887.12	C. lavandulifolium 0005019	0.515342	S9	c82337.graph_c0.p1	C. morifolium 1703.32	0.212477	3R	c71275.graph_c0.p1	C. morifolium 1124.237	0.140803	S20	C. seticuspe LG6.g58713	C. morifolium 1620.5	0.400026	S24	C. lavandulifolium 0071756	c44770.graph_c0.p1	0.0498381	S21	C. lavandulifolium 0080793	c87446.graph_c0.p1	0.183421	S21	C. lavandulifolium 0068906	C. makinoi021596-T1	0.447358	TBP-LIKE	C. lavandulifolium 0081873	C. seticuspe LG6.g00110	0.376134	S3
C. morifolium 3664.5	C. lavandulifolium 0018148	0.512305	S7	c84495.graph_c0.p1	C. morifolium 4775.84	0.210445	S21	c14424.graph_c0.p1	C. morifolium 923.126	0.136377	S19	C. seticuspe LG2.g53460	C. morifolium 3999.192	0.397395	r-r-TYPE	C. lavandulifolium 0073621	c65294.graph_c0.p1	0.0489131	CCA1-LIKE	C. lavandulifolium 0042079	c85533.graph_c0.p1	0.172642	CCA1-LIKE	C. lavandulifolium 0081873	C. makinoi052281-T1	0.44722	S3	C. lavandulifolium 0083279	C. seticuspe LG1.g12103	0.373111	S7
C. morifolium asm3_new.3023	C. lavandulifolium 0008159	0.500229	TRF-LIKE	c79395.graph_c0.p1	C. morifolium 986.70	0.209676	S27	c56243.graph_c0.p1	C. morifolium 1639.55	0.136224	CCA1-LIKE	C. seticuspe LG4.g56778	C. morifolium 1371.479	0.395678	S1	C. lavandulifolium 0069523	c16131.graph_c0.p1	0.0463549	S27	C. lavandulifolium 0014460	c73332.graph_c0.p1	0.170908	S27	C. lavandulifolium 0009758	C. makinoi060194-T1	0.442567	S8	C. lavandulifolium 0002645	C. seticuspe LG7.g15395	0.366924	S21
C. morifolium 267.67	C. lavandulifolium 0008159	0.500229	TRF-LIKE	c95249.graph_c0.p1	C. morifolium 9874.147	0.208531	S8	c53166.graph_c0.p1	C. morifolium 987.409	0.128659	S12	C. seticuspe LG1.g49015	C. morifolium 68.46	0.379736	TBP-LIKE	C. lavandulifolium 0054519	c42257.graph_c0.p1	0.0451973	r-r-TYPE	C. lavandulifolium 0058528	c84404.graph_c0.p1	0.168034	r-r-TYPE	C. lavandulifolium 0035609	C. makinoi036351-T1	0.436726	S20	C. lavandulifolium 0071410	C. seticuspe LG9.g07275	0.366849	TBP-LIKE
C. morifolium 465.152	C. lavandulifolium 0030969	0.500204	S8	c85533.graph_c0.p1	C. morifolium 846.54	0.194551	S2	c42257.graph_c0.p1	C. morifolium 250.308	0.108452	r-r-TYPE	C. seticuspe LG2.g54144	C. morifolium 10269.11	0.37867	S21	C. lavandulifolium 0034253	c32624.graph_c0.p1	0.0393591	S13	C. lavandulifolium 0085131	c16861.graph_c0.p1	0.166633	S13	C. lavandulifolium 0008610	C. makinoi008852-T1	0.433522	CCA1-LIKE	C. lavandulifolium 0032284	C. seticuspe LG4.g64959	0.363852	S12
C. morifolium 1874.123	C. lavandulifolium 0037061	0.493563	TBP-LIKE	c87446.graph_c0.p1	C. morifolium 1639.55	0.183165	CCA1-LIKE	c55223.graph_c0.p1	C. morifolium 1644.136	0.107227	S27	C. seticuspe LG1.g63989	C. morifolium 11263.17	0.364852	4R	C. lavandulifolium 0001999	c50573.graph_c0.p1	0.0333953	S20	C. lavandulifolium 0054519	c78307.graph_c0.p1	0.16442	S20	C. lavandulifolium 0000325	C. makinoi040799-T1	0.430437	S12	C. lavandulifolium 0049090	C. seticuspe LG4.g01954	0.36305	S23
C. morifolium 857.27_C. morifolium 857.28	C. lavandulifolium 0081873	0.492084	S3	c73332.graph_c0.p1	C. morifolium 972.219	0.179422	S13	c69167.graph_c0.p1	C. morifolium 1762.59	0.106819	S22	C. seticuspe LG3.g46111	C. morifolium 9689.30	0.362976	r-r-TYPE	C. lavandulifolium 0005801	c56734.graph_c0.p1	0.0297853	S8	C. lavandulifolium 0042079	c73271.graph_c0.p1	0.158802	S8	C. lavandulifolium 0042820	C. makinoi010610-T1	0.427464	S15	C. lavandulifolium 0054308	C. seticuspe LG8.g50968	0.359484	S7
C. morifolium 957.3	C. lavandulifolium 0017575	0.486798	S23	c73332.graph_c0.p1	C. morifolium 1267.189	0.177708	S13	c59490.graph_c0.p1	C. morifolium 12199.33	0.104044	TBP-LIKE	C. seticuspe LG2.g32400	C. morifolium 952.378	0.356571	CCA1-LIKE	C. lavandulifolium 0072459	c56873.graph_c0.p1	0.0242584	S12	C. lavandulifolium 0042278	c91677.graph_c0.p1	0.14809	S12	C. lavandulifolium 0049645	C. makinoi086404-T1	0.425921	S21	C. lavandulifolium 0022944	C. seticuspe LG4.g53329	0.356623	TBP-LIKE
C. morifolium 1400.64.1	C. lavandulifolium 0042623	0.486793	CPC-LIKE	c91568.graph_c0.p1	C. morifolium 7863.5	0.16901	S20	c68257.graph_c0.p1	C. morifolium 1386.67	0.0971568	S25	C. seticuspe LG4.g20440	C. morifolium 250.69	0.355095	TBP-LIKE	C. lavandulifolium 0014446	c61636.graph_c1.p1	0.0151144	S21	C. lavandulifolium 0070115	c91677.graph_c0.p1	0.147731	S21	C. lavandulifolium 0064119	C. makinoi045720-T1	0.425031	S15	C. lavandulifolium 0078983	C. seticuspe LG6.g13561	0.352897	S8
C. morifolium 1371.650	C. lavandulifolium 0064825	0.474269	CCA1-LIKE	c78307.graph_c0.p1	C. morifolium 4461.13	0.16442	r-r-TYPE	c34588.graph_c0.p1	C. morifolium 6658.49	0.0958107	S10	C. seticuspe LG7.g29701	C. morifolium 10818.10	0.352405	S13	C. lavandulifolium 0066403	c62560.graph_c1.p1	0	CCA1-LIKE	C. lavandulifolium 0014446	c92461.graph_c0.p1	0.141078	CCA1-LIKE	C. lavandulifolium 0073905	C. makinoi057221-T1	0.423743	S8	C. lavandulifolium 0049090	C. seticuspe LG4.g02022	0.351282	S23
C. morifolium 1874.123	C. lavandulifolium 0016360	0.473766	TBP-LIKE	c79835.graph_c1.p1	C. morifolium 11771.308	0.164205	S27	c41355.graph_c0.p1	C. morifolium 1458.41	0.0957525	S8	C. seticuspe LG5.g52757	C. morifolium 1312.47	0.349119	S17	C. lavandulifolium 0036949	c45748.graph_c0.p1	0	S21	C. lavandulifolium 0046746	c72153.graph_c0.p1	0.137903	S21	C. lavandulifolium 0009758	C. makinoi055678-T1	0.422831	S8	C. lavandulifolium 0055426	C. seticuspe LG7.g01715	0.344689	S10
C. morifolium 11378.72	C. lavandulifolium 0037334	0.472698	S13	c92674.graph_c0.p1	C. morifolium 1762.59	0.155907	S22	c41355.graph_c0.p1	C. morifolium asm20_new.1540	0.0957525	S8	C. seticuspe LG8.g61877	C. morifolium 11506.109	0.330525	S24	C. lavandulifolium 0046995	c36271.graph_c1.p1	0	S16	C. lavandulifolium 0071756	c76926.graph_c0.p1	0.135012	S16	C. lavandulifolium 0014446	C. makinoi019637-T1	0.422687	S21	C. lavandulifolium 0008124	C. seticuspe LG1.g49015	0.342345	TBP-LIKE
C. morifolium 249.52	C. lavandulifolium 0060645	0.470634	S8	c97408.graph_c0.p1	C. morifolium 7863.5	0.149219	S20	c60549.graph_c0.p1	C. morifolium 1191.17	0.0922078	3R	C. seticuspe LG1.g45395	C. morifolium 699.412	0.322699	S7	C. lavandulifolium 0056323	c65017.graph_c0.p2	0	TBP-LIKE	C. lavandulifolium 0058660	c82337.graph_c0.p1	0.118642	TBP-LIKE	C. lavandulifolium 0008124	C. makinoi011321-T1	0.420563	TBP-LIKE	C. lavandulifolium 0080533	C. seticuspe LG4.g02022	0.338066	S23
C. morifolium 5768.170	C. lavandulifolium 0064825	0.467796	CCA1-LIKE	c91706.graph_c0.p2	C. morifolium 284.105	0.148157	CCA1-LIKE	c42410.graph_c0.p1	C. morifolium 7437.24	0.0868597	r-r-TYPE	C. seticuspe LG3.g30148	C. morifolium 1365.130	0.315348	S24	C. lavandulifolium 0088951	c65017.graph_c0.p2	0	TBP-LIKE	C. lavandulifolium 0039031	c71549.graph_c1.p1	0.111767	TBP-LIKE	C. lavandulifolium 0044716	C. makinoi029103-T1	0.417829	r-r-TYPE	C. lavandulifolium 0010416	C. seticuspe LG2.g55931	0.331966	S15
C. morifolium 3294.100	C. lavandulifolium 0087956	0.461979	TBP-LIKE	c86636.graph_c0.p1	C. morifolium 15.52	0.14101	S21	c42410.graph_c0.p1	C. morifolium asm3_new.1945	0.0868597	r-r-TYPE	C. seticuspe LG3.g41468	C. morifolium 1266.432	0.313218	S10	C. lavandulifolium 0004670	c56621.graph_c0.p1	0	r-r-TYPE	C. lavandulifolium 0012234	c77004.graph_c1.p1	0.105521	r-r-TYPE	C. lavandulifolium 0009758	C. makinoi055677-T1	0.416326	S8	C. lavandulifolium 0039071	C. seticuspe LG8.g05256	0.327866	TBP-LIKE
C. morifolium asm20_new.1011	C. lavandulifolium 0032495	0.461653	CCA1-LIKE	c92461.graph_c0.p1	C. morifolium 1099.236	0.140233	S21	c59490.graph_c0.p1	C. morifolium 460.13	0.086764	TBP-LIKE	C. seticuspe LG8.g03990	C. morifolium 1483.300	0.303775	S8	C. lavandulifolium 0016858	c65519.graph_c0.p1	0	r-r-TYPE	C. lavandulifolium 0056323	c88950.graph_c0.p1	0.100546	r-r-TYPE	C. lavandulifolium 0033141	C. makinoi047500-T1	0.414532	TBP-LIKE	C. lavandulifolium 0052172	C. seticuspe LG9.g06948	0.325255	S25
C. morifolium 10592.64	C. lavandulifolium 0009508	0.459736	CCA1-LIKE	c75719.graph_c0.p1	C. morifolium 1096.7	0.135713	S20	c44770.graph_c0.p1	C. morifolium 1451.103	0.0852029	S21	C. seticuspe LG6.g00110	C. morifolium 4355.28	0.303147	S3	C. lavandulifolium 0021135	c62114.graph_c0.p2	0	r-r-TYPE	C. lavandulifolium 0016858	c74732.graph_c0.p1	0.0999869	r-r-TYPE	C. lavandulifolium 0052197	C. makinoi054834-T1	0.405885	I-BOX-BINGDING	C. lavandulifolium 0069459	C. seticuspe LG2.g53460	0.323577	r-r-TYPE
C. morifolium 1060.13	C. lavandulifolium 0054308	0.456194	S7	c79169.graph_c0.p1	C. morifolium 1618.181	0.134268	S25	c68423.graph_c0.p1	C. morifolium 1795.216	0.0815423	TBP-LIKE	C. seticuspe LG4.g02022	C. morifolium 4838.12	0.301945	S23	C. lavandulifolium 0039031	c34956.graph_c0.p1	0	S20	C. lavandulifolium 0078983	c92049.graph_c0.p1	0.089369	S20	C. lavandulifolium 0081873	C. makinoi052277-T1	0.402877	S3	C. lavandulifolium 0020059	C. seticuspe LG6.g47382	0.315136	3R
C. morifolium 1503.29	C. lavandulifolium 0039540	0.45605	S20	c85533.graph_c0.p1	C. morifolium 1659.241	0.130475	S2	c39597.graph_c0.p1	C. morifolium 2947.10	0.0805923	S2	C. seticuspe LG8.g11228	C. morifolium 19.4	0.299769	S8	C. lavandulifolium 0068923	c46873.graph_c0.p1	0	S12	C. lavandulifolium 0079917	c80847.graph_c0.p1	0.0814831	S12	C. lavandulifolium 0000503	C. makinoi020897-T1	0.398912	r-r-TYPE	C. lavandulifolium 0027704	C. seticuspe LG3.g52047	0.313502	3R
C. morifolium 1146.385	C. lavandulifolium 0068906	0.449386	TBP-LIKE	c16861.graph_c0.p1	C. morifolium 537.26	0.123009	S5	c16131.graph_c0.p1	C. morifolium 10424.11	0.0785122	S27	C. seticuspe LG9.g70282	C. morifolium 1568.60	0.283448	S22					C. lavandulifolium 0036949	c82357.graph_c0.p1	0.0730837		C. lavandulifolium 0016360	C. makinoi039279-T1	0.398289	TBP-LIKE	C. lavandulifolium 0018759	C. seticuspe LG9.g07275	0.301625	TBP-LIKE
C. morifolium 19.4	C. lavandulifolium 0064449	0.438709	S8	c74366.graph_c0.p1	C. morifolium 311.314	0.121213	S2	c56873.graph_c0.p1	C. morifolium 9941.49	0.0765689	S12	C. seticuspe LG4.g16237	C. morifolium asm3_new.964	0.2752	S15					C. lavandulifolium 0033110	c90010.graph_c0.p1	0.0674283		C. lavandulifolium 0063810	C. makinoi060752-T1	0.395532	S8	C. lavandulifolium 0055211	C. seticuspe LG9.g70282	0.299194	S22
C. morifolium 4838.12	C. lavandulifolium 0036679	0.435744	S23	c87917.graph_c0.p1	C. morifolium 3092.21	0.118645	S7	c52043.graph_c0.p1	C. morifolium 8760.78	0.0762242	S13	C. seticuspe LG4.g16237	C. morifolium 5577.113	0.2752	S15					C. lavandulifolium 0005801	c88428.graph_c0.p1	0.0548173		C. lavandulifolium 0012112	C. makinoi022616-T1	0.394023	S15	C. lavandulifolium 0027319	C. seticuspe LG6.g30980	0.296353	TBP-LIKE
C. morifolium 24.248	C. lavandulifolium 0038581	0.430255	S20	c87917.graph_c0.p1	C. morifolium 1269.667	0.118645	S7	c50573.graph_c0.p1	C. morifolium 4627.4	0.0755383	S20	C. seticuspe LG2.g54041	C. morifolium 1915.2	0.272432	S21					C. lavandulifolium 0087886	c99198.graph_c0.p1	0.0395865		C. lavandulifolium 0081873	C. makinoi052283-T1	0.393794	S3	C. lavandulifolium 0001561	C. seticuspe LG2.g25945	0.290965	S8
C. morifolium 19.4	C. lavandulifolium 0063810	0.423633	S8	c71549.graph_c1.p1	C. morifolium 1402.59	0.111767	S20	c66466.graph_c0.p1	C. morifolium 1688.135	0.0750303	3R	C. seticuspe LG7.g51360	C. morifolium 1690.49	0.26668	S12					C. lavandulifolium 0001999	c75719.graph_c0.p1	0.0385382		C. lavandulifolium 0056911	C. makinoi068575-T1	0.393052	TBP-LIKE	C. lavandulifolium 0029612	C. seticuspe LG2.g32477	0.287141	CCA1-LIKE
C. morifolium 5234.52	C. lavandulifolium 0032268	0.419521	TBP-LIKE	c88950.graph_c0.p1	C. morifolium 499.190.2	0.108625	TBP-LIKE	c66466.graph_c0.p1	C. morifolium 1273.35	0.0750303	3R	C. seticuspe LG7.g29701	C. morifolium 201.186	0.260897	S13					C. lavandulifolium 0076158	c84374.graph_c0.p1	0.0366205		C. lavandulifolium 0040030	C. makinoi073146-T1	0.391286	S6	C. lavandulifolium 0069640	C. seticuspe LG9.g59437	0.284865	S19
C. morifolium 117.231	C. lavandulifolium 0027697	0.415207	S24	c16861.graph_c0.p1	C. morifolium 400.112	0.10451	S5	c65294.graph_c0.p1	C. morifolium 451.51	0.0737628	CCA1-LIKE	C. seticuspe LG1.g38863	C. morifolium 399.30	0.260276	S16					C. lavandulifolium 0068923	c72568.graph_c0.p1	0.0365984		C. lavandulifolium 0065456	C. makinoi068762-T1	0.390786	S24	C. lavandulifolium 0079917	C. seticuspe LG1.g43013	0.281009	S4
C. morifolium 177.8	C. lavandulifolium 0027697	0.415207	S24	c92049.graph_c0.p1	C. morifolium 1402.158	0.103802	S8	c42257.graph_c0.p1	C. morifolium 4461.13	0.0684529	r-r-TYPE	C. seticuspe LG4.g16230	C. morifolium 692.177	0.259904	S15					C. lavandulifolium 0069523	c52121.graph_c0.p1	0.0342867		C. lavandulifolium 0008258	C. makinoi056442-T1	0.389992	TBP-LIKE	C. lavandulifolium 0078472	C. seticuspe LG6.g29793	0.275842	S7
C. morifolium 1660.263	C. lavandulifolium 0039071	0.414072	TBP-LIKE	c86508.graph_c0.p1	C. morifolium 1134.74	0.100524	S19	c66200.graph_c0.p1	C. morifolium 8978.22	0.054593	4R	C. seticuspe LG9.g10349	C. morifolium 3664.5	0.256466	S7					C. lavandulifolium 0072459	c70340.graph_c0.p1	0.0327673		C. lavandulifolium 0031975	C. makinoi000786-T1	0.383092	S24	C. lavandulifolium 0085612	C. seticuspe LG4.g64959	0.274616	S12
C. morifolium 1390.88	C. lavandulifolium 0040030	0.411219	S6	c91719.graph_c0.p1	C. morifolium 1273.35	0.100168	3R	c50573.graph_c0.p1	C. morifolium 1096.7	0.0536229	S20	C. seticuspe LG5.g26567	C. morifolium 5424.109	0.2513	TBP-LIKE					C. lavandulifolium 0073621	c92616.graph_c0.p1	0.0295373		C. lavandulifolium 0032895	C. makinoi031416-T1	0.382001	S7	C. lavandulifolium 0008551	C. seticuspe LG7.g72489	0.274018	S6
C. morifolium 5234.52	C. lavandulifolium 0033141	0.409475	TBP-LIKE	c75719.graph_c0.p1	C. morifolium 11645.8	0.0993897	S20	c39597.graph_c0.p1	C. morifolium 311.314	0.0478671	S2	C. seticuspe LG6.g29793	C. morifolium 914.34	0.250614	S7					C. lavandulifolium 0088951	c88950.graph_c0.p1	0		C. lavandulifolium 0088951	C. makinoi048806-T1	0.381566	TBP-LIKE	C. lavandulifolium 0076158	C. seticuspe LG3.g41484	0.272221	S19
C. morifolium 1085.78	C. lavandulifolium 0004859	0.409154	S13	c75719.graph_c0.p1	C. morifolium 4627.4	0.0993897	S20	c50969.graph_c0.p1	C. morifolium 463.275	0.0447274	S1	C. seticuspe LG6.g30980	C. morifolium 3294.100	0.247871	TBP-LIKE					C. lavandulifolium 0027052	c29776.graph_c0.p1	0		C. lavandulifolium 0032268	C. makinoi047500-T1	0.381481	TBP-LIKE	C. lavandulifolium 0014460	C. seticuspe LG3.g41486	0.270509	S10
C. morifolium 1568.60	C. lavandulifolium 0055211	0.403063	S22	c91677.graph_c0.p1	C. morifolium 248.19	0.09836	CCA1-LIKE	c44770.graph_c0.p1	C. morifolium 764.299	0.0411316	S21	C. seticuspe LG2.g52597	C. morifolium 3576.41	0.24772	S22					C. lavandulifolium 0053043	c29776.graph_c0.p1	0		C. lavandulifolium 0029612	C. makinoi017863-T1	0.379232	CCA1-LIKE	C. lavandulifolium 0076158	C. seticuspe LG6.g46886	0.262651	S19
C. morifolium 479.173	C. lavandulifolium 0070427	0.402403	S21	c91677.graph_c0.p1	C. morifolium 393.6	0.09836	CCA1-LIKE	c12504.graph_c1.p1	C. morifolium 9941.49	0.0270912	S12	C. seticuspe LG4.g01975	C. morifolium 4838.12	0.2467	S23					C. lavandulifolium 0061716	c97544.graph_c0.p2	0		C. lavandulifolium 0057804	C. makinoi088327-T1	0.377319	S7	C. lavandulifolium 0049242	C. seticuspe LG2.g52597	0.256144	S22
C. morifolium 8830.58	C. lavandulifolium 0053043	0.387544	S12	c71549.graph_c1.p1	C. morifolium 453.98	0.0974535	S20	c61971.graph_c0.p1	C. morifolium 811.343	0.0251654	S10	C. seticuspe LG4.g02031	C. morifolium 957.10	0.236813	S23					C. lavandulifolium 0070183	c88569.graph_c0.p1	0		C. lavandulifolium 0014618	C. makinoi092788-T1	0.377192	S24	C. lavandulifolium 0008862	C. seticuspe LG5.g25311	0.253695	S24
C. morifolium 5811.22	C. lavandulifolium 0083285	0.382314	4R	c44317.graph_c0.p1	C. morifolium 1519.122	0.0904865	S20	c14965.graph_c0.p1	C. morifolium 1809.67	0	S27	C. seticuspe LG2.g53460	C. morifolium 1521.97	0.234985	r-r-TYPE									C. lavandulifolium 0018148	C. makinoi010108-T1	0.372486	S7	C. lavandulifolium 0016827	C. seticuspe LG8.g04652	0.248969	S16
C. morifolium 1390.88	C. lavandulifolium 0007342	0.377843	S6	c44317.graph_c0.p1	C. morifolium asm3_new.3361	0.0904865	S20	c56734.graph_c0.p1	C. morifolium 1458.41	0	S8	C. seticuspe LG8.g22399	C. morifolium 1402.158	0.230731	S8									C. lavandulifolium 0079801	C. makinoi056442-T1	0.372111	TBP-LIKE	C. lavandulifolium 0048831	C. seticuspe LG5.g52757	0.244767	S17
C. morifolium 1365.130	C. lavandulifolium 0031975	0.365474	S24	c77909.graph_c0.p1	C. morifolium 1926.21	0.0803221	S27	c56734.graph_c0.p1	C. morifolium asm20_new.1540	0	S8	C. seticuspe LG3.g51418	C. morifolium 647.148	0.229381	S27									C. lavandulifolium 0057391	C. makinoi021596-T1	0.371926	TBP-LIKE	C. lavandulifolium 0049085	C. seticuspe LG9.g50842	0.24242	S5
C. morifolium 8830.58	C. lavandulifolium 0027052	0.362944	S12	c91719.graph_c0.p1	C. morifolium 1688.135	0.0749845	3R	c34956.graph_c0.p1	C. morifolium 453.98	0	S20	C. seticuspe LG3.g51418	C. morifolium 11771.308	0.228565	S27									C. lavandulifolium 0052172	C. makinoi028070-T1	0.369836	S25	C. lavandulifolium 0031847	C. seticuspe LG3.g26938	0.239546	S26
C. morifolium 1546.100	C. lavandulifolium 0051580	0.360819	S26	c82357.graph_c0.p1	C. morifolium 1445.85	0.0730837	S21	c34956.graph_c0.p1	C. morifolium 1402.59	0	S20	C. seticuspe LG9.g50842	C. morifolium 3417.11	0.228088	S5									C. lavandulifolium 0087883	C. makinoi019642-T1	0.368185	S8	C. lavandulifolium 0014772	C. seticuspe LG4.g02743	0.237606	CCA1-LIKE
C. morifolium 61.299	C. lavandulifolium 0046309	0.352105	CCA1-LIKE	c80847.graph_c0.p1	C. morifolium 12287.102	0.0714797	S4	c48861.graph_c0.p1	C. morifolium 822.156	0	S19	C. seticuspe LG2.g32477	C. morifolium 225.632_C. morifolium 225.634	0.226114	CCA1-LIKE									C. lavandulifolium 0053513	C. makinoi049637-T1	0.367298	S27	C. lavandulifolium 0014310	C. seticuspe LG9.g06948	0.236885	S25
C. morifolium 3417.11	C. lavandulifolium 0049085	0.351054	S5	c90010.graph_c0.p1	C. morifolium 462.14	0.0678802	r-r-TYPE	c48861.graph_c0.p1	C. morifolium 822.22	0	S19	C. seticuspe LG4.g42687	C. morifolium 4775.84	0.224183	S21									C. lavandulifolium 0037334	C. makinoi088614-T1	0.36645	S13	C. lavandulifolium 0063912	C. seticuspe LG1.g28057	0.235271	S8
C. morifolium 2432.15	C. lavandulifolium 0054394	0.349304	S2	c72568.graph_c0.p1	C. morifolium 1431.48	0.0648456	S12	c45748.graph_c0.p1	C. morifolium 1445.85	0	S21	C. seticuspe LG7.g15395	C. morifolium 10269.11	0.20713	S21									C. lavandulifolium 0043642	C. makinoi061518-T1	0.365983	S24	C. lavandulifolium 0012900	C. seticuspe LG3.g41490	0.234599	S10
C. morifolium 1312.47	C. lavandulifolium 0048831	0.347138	S17	c84374.graph_c0.p1	C. morifolium 1670.167	0.0638898	S19	c61636.graph_c1.p1	C. morifolium 1099.236	0	S21	C. seticuspe LG7.g72489	C. morifolium 1390.83	0.204781	S6									C. lavandulifolium 0064119	C. makinoi033714-T1	0.361487	S15	C. lavandulifolium 0066403	C. seticuspe LG2.g57268	0.231069	CCA1-LIKE
C. morifolium 61.158	C. lavandulifolium 0052172	0.347076	S25	c92616.graph_c0.p1	C. morifolium 451.51	0.0593894	CCA1-LIKE	c54274.graph_c0.p1	C. morifolium asm7_new.212	0	S1	C. seticuspe LG4.g64959	C. morifolium 1457.400	0.196826	S12									C. lavandulifolium 0065456	C. makinoi068764-T1	0.359268	S24	C. lavandulifolium 0014618	C. seticuspe LG5.g25311	0.228044	S24
C. morifolium 1363.22	C. lavandulifolium 0055211	0.345683	S22	c15179.graph_c0.p1	C. morifolium 1546.100	0.0555597	S26	c54274.graph_c0.p1	C. morifolium 123.4	0	S1	C. seticuspe LG8.g12874	C. morifolium 1654.148	0.193964	S10									C. lavandulifolium 0050925	C. makinoi010620-T1	0.358474	S7	C. lavandulifolium 0025914	C. seticuspe LG6.g26175	0.224552	S26
C. morifolium 566.171	C. lavandulifolium 0041510	0.338405	S15	c99198.graph_c0.p1	C. morifolium 1366.223	0.0549869	S25	c19271.graph_c0.p1	C. morifolium 909.182	0	I-BOX-BINGDING	C. seticuspe LG1.g12127	C. morifolium 1348.248	0.19242	S7									C. lavandulifolium 0012263	C. makinoi031416-T1	0.357842	S7	C. lavandulifolium 0063361	C. seticuspe LG5.g00872	0.223088	S5
C. morifolium 284.105	C. lavandulifolium 0040664	0.337965	CCA1-LIKE	c88428.graph_c0.p1	C. morifolium asm20_new.1540	0.0536201	S8	c70303.graph_c0.p1	C. morifolium 1622.233	0	S8	C. seticuspe LG8.g04652	C. morifolium 1660.92	0.189701	S16									C. lavandulifolium 0031847	C. makinoi036618-T1	0.354783	S26	C. lavandulifolium 0056911	C. seticuspe LG5.g26567	0.215549	TBP-LIKE
C. morifolium 811.343	C. lavandulifolium 0055426	0.335143	S10	c88428.graph_c0.p1	C. morifolium 1458.41	0.0536201	S8	c32624.graph_c0.p1	C. morifolium 1291.130	0	S13	C. seticuspe LG3.g41486	C. morifolium 10628.168	0.189318	S10									C. lavandulifolium 0046309	C. makinoi028182-T1	0.352787	CCA1-LIKE	C. lavandulifolium 0069459	C. seticuspe LG8.g47932	0.214765	r-r-TYPE
C. morifolium 1729.9	C. lavandulifolium 0080793	0.334362	CCA1-LIKE	c88334.graph_c0.p1	C. morifolium 250.308	0.0519983	r-r-TYPE	c20566.graph_c0.p1	C. morifolium 986.70	0	S27	C. seticuspe LG5.g68087	C. morifolium 1366.97	0.182526	S8									C. lavandulifolium 0064825	C. makinoi038999-T1	0.351752	CCA1-LIKE	C. lavandulifolium 0007342	C. seticuspe LG7.g72480	0.21235	S6
C. morifolium 1703.32	C. lavandulifolium 0027704	0.332196	3R	c76098.graph_c0.p1	C. morifolium 8760.78	0.0447279	S13	c65009.graph_c0.p1	C. morifolium 2926.6	0	CCA1-LIKE	C. seticuspe LG4.g37129	C. morifolium 67.56	0.181151	S20									C. lavandulifolium 0037061	C. makinoi040592-T1	0.345701	TBP-LIKE	C. lavandulifolium 0047497	C. seticuspe LG5.g68087	0.206009	S8
C. morifolium 1409.207	C. lavandulifolium 0042820	0.332052	S15	c93793.graph_c1.p1	C. morifolium 1795.216	0.0433732	TBP-LIKE	c62114.graph_c0.p2	C. morifolium 216.61	0	r-r-TYPE	C. seticuspe LG6.g55347	C. morifolium 15.52	0.180668	S21									C. lavandulifolium 0009508	C. makinoi090031-T1	0.34241	CCA1-LIKE	C. lavandulifolium 0072080	C. seticuspe LG2.g54167	0.205231	S21
C. morifolium 644.454	C. lavandulifolium 0000503	0.326849	r-r-TYPE	c72568.graph_c0.p1	C. morifolium 223.363	0.0428761	S12	c58519.graph_c0.p1	C. morifolium 462.14	0	r-r-TYPE	C. seticuspe LG2.g57268	C. morifolium 284.105	0.174034	CCA1-LIKE									C. lavandulifolium 0056323	C. makinoi048806-T1	0.341553	TBP-LIKE	C. lavandulifolium 0054519	C. seticuspe LG8.g47932	0.203882	r-r-TYPE
C. morifolium 8676.74	C. lavandulifolium 0063361	0.32021	S5	c72568.graph_c0.p1	C. morifolium 1180.328	0.0428761	S12					C. seticuspe LG2.g54167	C. morifolium 10269.11	0.166855	S21									C. lavandulifolium 0053043	C. makinoi017386-T1	0.340873	S12	C. lavandulifolium 0085245	C. seticuspe LG3.g51418	0.200387	S27
C. morifolium 6154.18	C. lavandulifolium 0069640	0.316814	S19	c52121.graph_c0.p1	C. morifolium 10424.11	0.0342591	S27					C. seticuspe LG2.g40860	C. morifolium 8768.21	0.165399	S13									C. lavandulifolium 0027052	C. makinoi017386-T1	0.336406	S12	C. lavandulifolium 0046995	C. seticuspe LG1.g38863	0.195154	S16
C. morifolium 98.135	C. lavandulifolium 0018759	0.316465	TBP-LIKE	c99293.graph_c0.p2	C. morifolium 8286.351	0.0242881	r-r-TYPE					C. seticuspe LG9.g06261	C. morifolium 1761.1	0.154927	CCA1-LIKE									C. lavandulifolium 0068325	C. makinoi038919-T1	0.335627	S1	C. lavandulifolium 0050925	C. seticuspe LG1.g45395	0.194425	S7
C. morifolium 1348.248	C. lavandulifolium 0083279	0.312405	S7	c93170.graph_c0.p1	C. morifolium 1727.232	0.018776	S10					C. seticuspe LG2.g54431	C. morifolium 1915.2	0.149228	S21									C. lavandulifolium 0068853	C. makinoi022616-T1	0.334221	S15	C. lavandulifolium 0039031	C. seticuspe LG4.g25738	0.18708	S20
C. morifolium 393.6	C. lavandulifolium 0042278	0.304083	CCA1-LIKE	c93170.graph_c0.p1	C. morifolium 811.343	0.018721	S10					C. seticuspe LG1.g43013	C. morifolium 1757.40	0.14577	S4									C. lavandulifolium 0067586	C. makinoi066775-T1	0.334003	S8	C. lavandulifolium 0075339	C. seticuspe LG9.g07664	0.186766	S8
C. morifolium 248.19	C. lavandulifolium 0042278	0.304083	CCA1-LIKE	c77004.graph_c1.p1	C. morifolium asm16_new.2039	0	S19					C. seticuspe LG1.g43013	C. morifolium 518.474	0.14577	S4									C. lavandulifolium 0004670	C. makinoi008951-T1	0.333004	r-r-TYPE	C. lavandulifolium 0034253	C. seticuspe LG3.g22520	0.186162	S13
C. morifolium 891.48	C. lavandulifolium 0027319	0.302275	TBP-LIKE	c77004.graph_c1.p1	C. morifolium 972.24	0	S19					C. seticuspe LG5.g09625	C. morifolium 11378.72	0.145428	S13									C. lavandulifolium 0066403	C. makinoi033893-T1	0.332584	CCA1-LIKE	C. lavandulifolium 0070183	C. seticuspe LG6.g48730	0.182613	S1
C. morifolium 1678.244	C. lavandulifolium 0058528	0.29994	r-r-TYPE	c73271.graph_c0.p1	C. morifolium asm3_new.1566	0	S2					C. seticuspe LG9.g30332	C. morifolium 4095.45	0.135096	S23									C. lavandulifolium 0040664	C. makinoi022237-T1	0.332425	CCA1-LIKE	C. lavandulifolium 0033008	C. seticuspe LG1.g26933	0.182507	S2
C. morifolium 1017.261	C. lavandulifolium 0073905	0.299727	S8	c74732.graph_c0.p1	C. morifolium 1021.184	0	r-r-TYPE					C. seticuspe LG9.g07664	C. morifolium 1366.97	0.133145	S8									C. lavandulifolium 0056132	C. makinoi006316-T1	0.322538	S7	C. lavandulifolium 0039540	C. seticuspe LG4.g25738	0.180147	S20
C. morifolium 849.71	C. lavandulifolium 0071410	0.299575	TBP-LIKE	c77802.graph_c0.p1	C. morifolium 560.105	0	r-r-TYPE					C. seticuspe LG4.g34856	C. morifolium 117.231	0.129489	S24									C. lavandulifolium 0070427	C. makinoi026477-T1	0.32151	S21	C. lavandulifolium 0077450	C. seticuspe LG6.g70068	0.175612	S26
C. morifolium 1425.175	C. lavandulifolium 0066403	0.297603	CCA1-LIKE	c87897.graph_c0.p1	C. morifolium 5234.52	0	TBP-LIKE					C. seticuspe LG4.g34856	C. morifolium 177.8	0.129489	S24									C. lavandulifolium 0008604	C. makinoi077354-T1	0.31702	TRF-LIKE	C. lavandulifolium 0051627	C. seticuspe LG4.g45272	0.175354	TBP-LIKE
C. morifolium asm3_new.1148	C. lavandulifolium 0066403	0.297603	CCA1-LIKE	c87897.graph_c0.p1	C. morifolium 409.102	0	TBP-LIKE					C. seticuspe LG5.g56996	C. morifolium 537.26	0.125066	S5									C. lavandulifolium 0054807	C. makinoi006365-T1	0.316916	3R	C. lavandulifolium 0027052	C. seticuspe LG2.g20838	0.173211	S12
C. morifolium 1762.59	C. lavandulifolium 0049242	0.297239	S22	c71544.graph_c0.p1	C. morifolium 123.4	0	S1					C. seticuspe LG5.g56996	C. morifolium 400.112	0.125066	S5									C. lavandulifolium 0014310	C. makinoi094696-T1	0.31689	S25	C. lavandulifolium 0008429	C. seticuspe LG8.g61877	0.167423	S24
C. morifolium 216.312	C. lavandulifolium 0059294	0.292921	I-BOX-BINGDING	c71544.graph_c0.p1	C. morifolium asm7_new.212	0	S1					C. seticuspe LG8.g28278	C. morifolium 1350.26	0.124032	S4									C. lavandulifolium 0052306	C. makinoi062608-T1	0.315491	S12	C. lavandulifolium 0046465	C. seticuspe LG6.g16145	0.165404	CCA1-LIKE
C. morifolium 957.10	C. lavandulifolium 0050349	0.286931	S23	c97544.graph_c0.p2	C. morifolium 1622.233	0	S8					C. seticuspe LG1.g47244	C. morifolium 468.132	0.123435	CPC-LIKE									C. lavandulifolium 0073975	C. makinoi037265-T1	0.314903	4R	C. lavandulifolium 0054519	C. seticuspe LG2.g53460	0.165355	r-r-TYPE
C. morifolium 987.223.1	C. lavandulifolium 0078472	0.285011	S7	c70366.graph_c0.p1	C. morifolium 533.239	0	S13					C. seticuspe LG8.g03423	C. morifolium 468.132	0.123147	CPC-LIKE									C. lavandulifolium 0051681	C. makinoi093881-T1	0.314454	S2	C. lavandulifolium 0013253	C. seticuspe LG8.g50968	0.164612	S7
C. morifolium 1729.9	C. lavandulifolium 0046465	0.284562	CCA1-LIKE	c88569.graph_c0.p1	C. morifolium 393.191	0	S1					C. seticuspe LG7.g69294	C. morifolium 8037.69	0.119626	S17									C. lavandulifolium 0007342	C. makinoi073146-T1	0.31318	S6	C. lavandulifolium 0003766	C. seticuspe LG3.g51418	0.162552	S27
C. morifolium 1915.2	C. lavandulifolium 0038851	0.281358	S21	c94130.graph_c0.p1	C. morifolium 5271.14	0	CCA1-LIKE					C. seticuspe LG4.g46793	C. morifolium 380.14	0.118835	S20									C. lavandulifolium 0055426	C. makinoi064283-T1	0.311929	S10	C. lavandulifolium 0052306	C. seticuspe LG4.g64959	0.159703	S12
C. morifolium 1000.290	C. lavandulifolium 0001072	0.27857	r-r-TYPE									C. seticuspe LG6.g70068	C. morifolium 665.91	0.117742	S26									C. lavandulifolium 0039031	C. makinoi095038-T1	0.311721	S20	C. lavandulifolium 0033158	C. seticuspe LG2.g44278	0.159516	S8
C. morifolium 1693.161	C. lavandulifolium 0063912	0.277695	S8									C. seticuspe LG5.g00872	C. morifolium 668.62	0.117189	S5									C. lavandulifolium 0020059	C. makinoi060139-T1	0.310678	3R	C. lavandulifolium 0072020	C. seticuspe LG2.g57268	0.157393	CCA1-LIKE
C. morifolium 272.233	C. lavandulifolium 0001561	0.275877	S8									C. seticuspe LG4.g52457	C. morifolium 1445.85	0.112795	S21									C. lavandulifolium 0018759	C. makinoi020357-T1	0.304872	TBP-LIKE	C. lavandulifolium 0069523	C. seticuspe LG4.g33997	0.155359	S27
C. morifolium 5577.113	C. lavandulifolium 0064119	0.2752	S15									C. seticuspe LG7.g01715	C. morifolium 1727.232	0.106587	S10									C. lavandulifolium 0047497	C. makinoi095060-T1	0.302848	S8	C. lavandulifolium 0072459	C. seticuspe LG7.g51360	0.154632	S12
C. morifolium asm3_new.964	C. lavandulifolium 0064119	0.2752	S15									C. seticuspe LG1.g55809	C. morifolium 1147.195	0.0937801	S13									C. lavandulifolium 0079917	C. makinoi076791-T1	0.302322	S4	C. lavandulifolium 0035609	C. seticuspe LG4.g37129	0.152741	S20
C. morifolium 1915.2	C. lavandulifolium 0002645	0.270568	S21									C. seticuspe LG4.g07625	C. morifolium 1000.290	0.0935132	r-r-TYPE									C. lavandulifolium 0039540	C. makinoi095038-T1	0.300563	S20	C. lavandulifolium 0073905	C. seticuspe LG1.g28057	0.151698	S8
C. morifolium 10424.11	C. lavandulifolium 0070076	0.270457	S27									C. seticuspe LG1.g26933	C. morifolium 2432.15	0.091269	S2									C. lavandulifolium 0036457	C. makinoi017862-T1	0.299947	CCA1-LIKE	C. lavandulifolium 0009486	C. seticuspe LG1.g47244	0.143495	CPC-LIKE
C. morifolium 1670.167	C. lavandulifolium 0037075	0.269666	S19									C. seticuspe LG9.g06948	C. morifolium 1366.223	0.0902999	S25									C. lavandulifolium 0063928	C. makinoi088850-T1	0.299789	S19	C. lavandulifolium 0009486	C. seticuspe LG8.g03423	0.143159	CPC-LIKE
C. morifolium 1503.55	C. lavandulifolium 0075339	0.26805	S8									C. seticuspe LG3.g26938	C. morifolium 1097.67	0.0852107	S26									C. lavandulifolium 0060645	C. makinoi022378-T1	0.297438	S8	C. lavandulifolium 0073975	C. seticuspe LG4.g45273	0.136171	4R
C. morifolium 957.3	C. lavandulifolium 0049090	0.266525	S23									C. seticuspe LG3.g52047	C. morifolium 1703.32	0.0815685	3R									C. lavandulifolium 0081873	C. makinoi052279-T1	0.297192	S3	C. lavandulifolium 0046995	C. seticuspe LG9.g51701	0.129694	S16
C. morifolium 155.19	C. lavandulifolium 0070830	0.259136	S26									C. seticuspe LG4.g45273	C. morifolium 8978.22	0.0771376	4R									C. lavandulifolium 0031975	C. makinoi035091-T1	0.293294	S24	C. lavandulifolium 0046330	C. seticuspe LG4.g34856	0.129489	S24
C. morifolium 1915.2	C. lavandulifolium 0061977	0.256301	S21									C. seticuspe LG4.g25280	C. morifolium 1580.6	0.0690005	S13									C. lavandulifolium 0001255	C. makinoi093183-T1	0.293224	TBP-LIKE	C. lavandulifolium 0085131	C. seticuspe LG5.g56996	0.127246	S5
C. morifolium 457.28	C. lavandulifolium 0038022	0.256283	S2									C. seticuspe LG4.g25280	C. morifolium asm3_new.3246	0.0690005	S13									C. lavandulifolium 0063928	C. makinoi088846-T1	0.292402	S19	C. lavandulifolium 0037334	C. seticuspe LG7.g29701	0.126718	S13
C. morifolium 457.28	C. lavandulifolium 0036281	0.256283	S2									C. seticuspe LG4.g25738	C. morifolium 1519.122	0.0678898	S20									C. lavandulifolium 0052186	C. makinoi022616-T1	0.289913	S15	C. lavandulifolium 0073621	C. seticuspe LG9.g06261	0.116695	CCA1-LIKE
C. morifolium 11771.142	C. lavandulifolium 0012112	0.251992	S15									C. seticuspe LG4.g25738	C. morifolium asm3_new.3361	0.0678898	S20									C. lavandulifolium 0009486	C. makinoi083378-T1	0.28818	CPC-LIKE	C. lavandulifolium 0036949	C. seticuspe LG4.g52457	0.112795	S21
C. morifolium 1348.248	C. lavandulifolium 0056132	0.247215	S7									C. seticuspe LG2.g46364	C. morifolium 9340.601	0.0644883	S21									C. lavandulifolium 0085612	C. makinoi040803-T1	0.28724	S12	C. lavandulifolium 0061646	C. seticuspe LG5.g27641	0.112191	S26
C. morifolium 1620.5	C. lavandulifolium 0014618	0.242745	S24									C. seticuspe LG1.g65092	C. morifolium 1546.100	0.0616266	S26									C. lavandulifolium 0068906	C. makinoi029808-T1	0.287079	TBP-LIKE	C. lavandulifolium 0007167	C. seticuspe LG2.g40860	0.105167	S13
C. morifolium 1915.2	C. lavandulifolium 0023801	0.241263	S21									C. seticuspe LG3.g22520	C. morifolium 1291.130	0.0555533	S13									C. lavandulifolium 0054394	C. makinoi072422-T1	0.287053	S2	C. lavandulifolium 0067586	C. seticuspe LG8.g03990	0.10109	S8
C. morifolium 67.56	C. lavandulifolium 0035609	0.240867	S20									C. seticuspe LG7.g01715	C. morifolium 811.343	0.0530521	S10									C. lavandulifolium 0083279	C. makinoi006316-T1	0.283794	S7	C. lavandulifolium 0075515	C. seticuspe LG3.g24085	0.0873022	S21
C. morifolium 699.412	C. lavandulifolium 0050925	0.238183	S7									C. seticuspe LG1.g26933	C. morifolium 1005.271	0.0451064	S2									C. lavandulifolium 0064119	C. makinoi022605-T1	0.283596	S15	C. lavandulifolium 0072459	C. seticuspe LG5.g14488	0.0819971	S12
C. morifolium 1915.2	C. lavandulifolium 0066979	0.238048	S21									C. seticuspe LG5.g14488	C. morifolium 9941.49	0.0411063	S12									C. lavandulifolium 0018759	C. makinoi020349-T1	0.283186	TBP-LIKE	C. lavandulifolium 0009083	C. seticuspe LG3.g17179	0.0756878	I-BOX-BINGDING
C. morifolium 6658.49	C. lavandulifolium 0057606	0.237746	S10									C. seticuspe LG6.g53927	C. morifolium 764.299	0.0408936	S21									C. lavandulifolium 0080793	C. makinoi051482-T1	0.274183	CCA1-LIKE	C. lavandulifolium 0061683	C. seticuspe LG3.g52047	0.0734018	3R
C. morifolium 1005.271	C. lavandulifolium 0054394	0.23574	S2									C. seticuspe LG4.g38592	C. morifolium 397.345	0.0369921	S26									C. lavandulifolium 0031847	C. makinoi045924-T1	0.262618	S26	C. lavandulifolium 0046746	C. seticuspe LG5.g72048	0.071992	TBP-LIKE
C. morifolium 1266.432	C. lavandulifolium 0012900	0.234978	S10									C. seticuspe LG8.g19438	C. morifolium 10424.11	0.0345916	S27									C. lavandulifolium 0057606	C. makinoi076296-T1	0.262313	S10	C. lavandulifolium 0087886	C. seticuspe LG9.g06948	0.0709245	S25
C. morifolium 1483.300	C. lavandulifolium 0067586	0.226007	S8									C. seticuspe LG8.g61274	C. morifolium 393.24	0.0327344	S8									C. lavandulifolium 0042278	C. makinoi079784-T1	0.259079	CCA1-LIKE	C. lavandulifolium 0078983	C. seticuspe LG8.g22399	0.0694155	S8
C. morifolium 6658.49	C. lavandulifolium 0012166	0.222681	S10									C. seticuspe LG8.g68501	C. morifolium 1630.10	0.0325277	S8									C. lavandulifolium 0061683	C. makinoi030436-T1	0.255263	3R	C. lavandulifolium 0063928	C. seticuspe LG9.g59437	0.067776	S19
C. morifolium 1693.150	C. lavandulifolium 0028629	0.220241	S15									C. seticuspe LG5.g72048	C. morifolium 1534.303	0.0323006	TBP-LIKE									C. lavandulifolium 0029612	C. makinoi025361-T1	0.254827	CCA1-LIKE	C. lavandulifolium 0050349	C. seticuspe LG4.g02031	0.0573837	S23
C. morifolium 891.48	C. lavandulifolium 0089004	0.216588	TBP-LIKE									C. seticuspe LG4.g09524	C. morifolium 4627.4	0.0261071	S20									C. lavandulifolium 0014772	C. makinoi006832-T1	0.253759	CCA1-LIKE	C. lavandulifolium 0035389	C. seticuspe LG8.g68501	0.0526572	S8
C. morifolium 14.95	C. lavandulifolium 0014310	0.215481	S25									C. seticuspe LG4.g09524	C. morifolium 11645.8	0.0261071	S20									C. lavandulifolium 0012900	C. makinoi028838-T1	0.252783	S10	C. lavandulifolium 0071756	C. seticuspe LG6.g53927	0.0495415	S21
C. morifolium 244.78	C. lavandulifolium 0016827	0.212005	S16									C. seticuspe LG2.g36857	C. morifolium 8760.78	0.0172787	S13									C. lavandulifolium 0033008	C. makinoi007655-T1	0.238984	S2	C. lavandulifolium 0058660	C. seticuspe LG3.g52047	0.0438785	3R
C. morifolium 1915.2	C. lavandulifolium 0072080	0.209858	S21									C. seticuspe LG1.g27945	C. morifolium asm20_new.1540	0	S8									C. lavandulifolium 0013253	C. makinoi044168-T1	0.231963	S7	C. lavandulifolium 0077450	C. seticuspe LG1.g65092	0.0417444	S26
C. morifolium 2432.15	C. lavandulifolium 0033008	0.204994	S2									C. seticuspe LG1.g27945	C. morifolium 1458.41	0	S8									C. lavandulifolium 0057391	C. makinoi029808-T1	0.229117	TBP-LIKE	C. lavandulifolium 0001999	C. seticuspe LG4.g09524	0.0385738	S20
C. morifolium 1046.43	C. lavandulifolium 0005801	0.204384	S8									C. seticuspe LG3.g30103	C. morifolium 1365.142	0	S18									C. lavandulifolium 0022944	C. makinoi080340-T1	0.22786	TBP-LIKE	C. lavandulifolium 0069523	C. seticuspe LG8.g19438	0.0346195	S27
C. morifolium 1620.5	C. lavandulifolium 0031769	0.203913	S24									C. seticuspe LG3.g30103	C. morifolium 1450.47	0	S18									C. lavandulifolium 0008862	C. makinoi005236-T1	0.222876	S24	C. lavandulifolium 0021667	C. seticuspe LG8.g68501	0.032631	S8
C. morifolium 166.115	C. lavandulifolium 0073905	0.199162	S8									C. seticuspe LG8.g12304	C. morifolium 1654.5	0	S13									C. lavandulifolium 0057391	C. makinoi040877-T1	0.221467	TBP-LIKE	C. lavandulifolium 0005801	C. seticuspe LG1.g27945	0.0297853	S8
C. morifolium 1028.108	C. lavandulifolium 0059827	0.198275	S13									C. seticuspe LG8.g12304	C. morifolium 964.64	0	S13									C. lavandulifolium 0042079	C. makinoi023227-T1	0.2214	S2	C. lavandulifolium 0045945	C. seticuspe LG2.g54431	0.0196054	S21
C. morifolium 1546.100	C. lavandulifolium 0045044	0.191896	S26									C. seticuspe LG8.g62372	C. morifolium 223.363	0	S12									C. lavandulifolium 0056911	C. makinoi045761-T1	0.221349	TBP-LIKE	C. lavandulifolium 0036679	C. seticuspe LG4.g01975	0	S23
C. morifolium 11506.109	C. lavandulifolium 0008429	0.19024	S24									C. seticuspe LG8.g62372	C. morifolium 1431.48	0	S12									C. lavandulifolium 0057606	C. makinoi076295-T1	0.220254	S10	C. lavandulifolium 0061716	C. seticuspe LG3.g29056	0	S8
C. morifolium 1000.290	C. lavandulifolium 0004670	0.187589	r-r-TYPE									C. seticuspe LG2.g17010	C. morifolium 123.4	0	S1									C. lavandulifolium 0023763	C. makinoi030550-T1	0.217429	S7	C. lavandulifolium 0012234	C. seticuspe LG3.g30103	0	S18
C. morifolium 244.78	C. lavandulifolium 0078890	0.186843	S16									C. seticuspe LG2.g17010	C. morifolium asm7_new.212	0	S1									C. lavandulifolium 0089004	C. makinoi058592-T1	0.217217	TBP-LIKE	C. lavandulifolium 0068923	C. seticuspe LG8.g62372	0	S12
C. morifolium 1874.123	C. lavandulifolium 0010520	0.185693	TBP-LIKE									C. seticuspe LG4.g53353	C. morifolium 216.312	0	I-BOX-BINGDING									C. lavandulifolium 0008551	C. makinoi073149-T1	0.216696	S6
C. morifolium 1390.83	C. lavandulifolium 0008551	0.182834	S6									C. seticuspe LG5.g47656	C. morifolium 409.102	0	TBP-LIKE									C. lavandulifolium 0078472	C. makinoi058441-T1	0.210645	S7
C. morifolium 1915.2	C. lavandulifolium 0045945	0.174394	S21									C. seticuspe LG5.g47656	C. morifolium 5234.52	0	TBP-LIKE									C. lavandulifolium 0081445	C. makinoi091316-T1	0.210083	S23
C. morifolium 692.177	C. lavandulifolium 0088390	0.172778	S15									C. seticuspe LG3.g08137	C. morifolium 986.70	0	S27									C. lavandulifolium 0012166	C. makinoi076296-T1	0.209667	S10
C. morifolium 1474.87	C. lavandulifolium 0023763	0.168305	S7									C. seticuspe LG3.g24085	C. morifolium 479.173	0	S21									C. lavandulifolium 0025914	C. makinoi057996-T1	0.208834	S26
C. morifolium 499.190.2	C. lavandulifolium 0056323	0.163378	TBP-LIKE									C. seticuspe LG3.g29056	C. morifolium 1622.233	0	S8									C. lavandulifolium 0063361	C. makinoi042187-T1	0.203722	S5
C. morifolium 1005.271	C. lavandulifolium 0033008	0.16336	S2									C. seticuspe LG3.g41490	C. morifolium 1446.85	0	S10									C. lavandulifolium 0033008	C. makinoi007656-T1	0.19986	S2
C. morifolium 479.173	C. lavandulifolium 0075515	0.154386	S21									C. seticuspe LG4.g02743	C. morifolium 5271.14	0	CCA1-LIKE									C. lavandulifolium 0036679	C. makinoi031374-T1	0.19857	S23
C. morifolium 952.378	C. lavandulifolium 0036457	0.150687	CCA1-LIKE									C. seticuspe LG4.g53319	C. morifolium 560.348	0	TBP-LIKE									C. lavandulifolium 0005019	C. makinoi009318-T1	0.197916	S9
C. morifolium 1457.400	C. lavandulifolium 0052306	0.148125	S12									C. seticuspe LG4.g53329	C. morifolium 560.345	0	TBP-LIKE									C. lavandulifolium 0063361	C. makinoi042171-T1	0.197882	S5
C. morifolium 647.148	C. lavandulifolium 0003766	0.145851	S27									C. seticuspe LG5.g27641	C. morifolium 737.414	0	S26									C. lavandulifolium 0071410	C. makinoi056442-T1	0.197147	TBP-LIKE
C. morifolium 1097.265	C. lavandulifolium 0033158	0.137884	S8									C. seticuspe LG7.g25328	C. morifolium 9204.114	0	S26									C. lavandulifolium 0049242	C. makinoi019969-T1	0.196809	S22
C. morifolium 11125.110	C. lavandulifolium 0025914	0.137328	S26									C. seticuspe LG9.g59437	C. morifolium 3959.203	0	S19									C. lavandulifolium 0061646	C. makinoi068501-T1	0.19554	S26
C. morifolium 1703.32	C. lavandulifolium 0061683	0.136545	3R																					C. lavandulifolium 0012166	C. makinoi076295-T1	0.195095	S10
C. morifolium 1915.2	C. lavandulifolium 0052294	0.133279	S21																					C. lavandulifolium 0076158	C. makinoi074272-T1	0.194514	S19
C. morifolium 9204.114	C. lavandulifolium 0061646	0.132334	S26																					C. lavandulifolium 0085245	C. makinoi058694-T1	0.19145	S27
C. morifolium 383.90	C. lavandulifolium 0014772	0.130248	CCA1-LIKE																					C. lavandulifolium 0050349	C. makinoi031361-T1	0.188329	S23
C. morifolium 12199.33	C. lavandulifolium 0001255	0.129981	TBP-LIKE																					C. lavandulifolium 0070115	C. makinoi079784-T1	0.185796	CCA1-LIKE
C. morifolium 8978.22	C. lavandulifolium 0073975	0.125832	4R																					C. lavandulifolium 0042079	C. makinoi071732-T1	0.185767	S2
C. morifolium 1457.402	C. lavandulifolium 0085612	0.125021	S12																					C. lavandulifolium 0077450	C. makinoi063556-T1	0.18552	S26
C. morifolium 11771.142	C. lavandulifolium 0068853	0.12483	S15																					C. lavandulifolium 0069640	C. makinoi027637-T1	0.185199	S19
C. morifolium 14.95	C. lavandulifolium 0087886	0.118479	S25																					C. lavandulifolium 0064119	C. makinoi033713-T1	0.185182	S15
C. morifolium 1135.19	C. lavandulifolium 0073905	0.11022	S8																					C. lavandulifolium 0049242	C. makinoi019970-T1	0.183979	S22
C. morifolium 1402.158	C. lavandulifolium 0078983	0.109306	S8																					C. lavandulifolium 0070830	C. makinoi045874-T1	0.182605	S26
C. morifolium 1620.5	C. lavandulifolium 0036744	0.109179	S24																					C. lavandulifolium 0077450	C. makinoi063537-T1	0.181965	S26
C. morifolium 1703.32	C. lavandulifolium 0058660	0.106203	3R																					C. lavandulifolium 0075339	C. makinoi021059-T1	0.17766	S8
C. morifolium 1534.303	C. lavandulifolium 0046746	0.104907	TBP-LIKE																					C. lavandulifolium 0054807	C. makinoi006367-T1	0.173564	3R
C. morifolium 8760.78	C. lavandulifolium 0052955	0.101769	S13																					C. lavandulifolium 0072459	C. makinoi070345-T1	0.166022	S12
C. morifolium 11771.142	C. lavandulifolium 0052186	0.101594	S15																					C. lavandulifolium 0003766	C. makinoi076638-T1	0.164008	S27
C. morifolium 1659.241	C. lavandulifolium 0042079	0.101422	S2																					C. lavandulifolium 0059827	C. makinoi082793-T1	0.16338	S13
C. morifolium 468.132	C. lavandulifolium 0009486	0.0970954	CPC-LIKE																					C. lavandulifolium 0032895	C. makinoi044168-T1	0.163352	S7
C. morifolium 499.190.2	C. lavandulifolium 0088951	0.0970735	TBP-LIKE																					C. lavandulifolium 0071756	C. makinoi060862-T1	0.162034	S21
C. morifolium 9002.103	C. lavandulifolium 0008604	0.0947338	TRF-LIKE																					C. lavandulifolium 0061716	C. makinoi026922-T1	0.161029	S8
C. morifolium 8768.21	C. lavandulifolium 0007167	0.0729041	S13																					C. lavandulifolium 0042079	C. makinoi034064-T1	0.160761	S2
C. morifolium 764.299	C. lavandulifolium 0071756	0.0725285	S21																					C. lavandulifolium 0031769	C. makinoi061518-T1	0.159925	S24
C. morifolium 255.44	C. lavandulifolium 0046995	0.0646551	S16																					C. lavandulifolium 0038581	C. makinoi037495-T1	0.159631	S20
C. morifolium 451.51	C. lavandulifolium 0073621	0.0626853	CCA1-LIKE																					C. lavandulifolium 0069523	C. makinoi035931-T1	0.154608	S27
C. morifolium 12287.102	C. lavandulifolium 0079917	0.0623416	S4																					C. lavandulifolium 0050218	C. makinoi047500-T1	0.148213	TBP-LIKE
C. morifolium 393.6	C. lavandulifolium 0070115	0.0597836	CCA1-LIKE																					C. lavandulifolium 0070183	C. makinoi036333-T1	0.145444	S1
C. morifolium 248.19	C. lavandulifolium 0070115	0.0597836	CCA1-LIKE																					C. lavandulifolium 0038581	C. makinoi037496-T1	0.14027	S20
C. morifolium 5318.98	C. lavandulifolium 0072459	0.0560043	S12																					C. lavandulifolium 0052955	C. makinoi018645-T1	0.139663	S13
C. morifolium 1021.184	C. lavandulifolium 0016858	0.0494701	r-r-TYPE																					C. lavandulifolium 0075515	C. makinoi026477-T1	0.137293	S21
C. morifolium 1291.130	C. lavandulifolium 0034253	0.0460493	S13																					C. lavandulifolium 0033158	C. makinoi026796-T1	0.132839	S8
C. morifolium 1630.10	C. lavandulifolium 0035389	0.0459475	S8																					C. lavandulifolium 0009519	C. makinoi034700-T1	0.130825	S20
C. morifolium 462.14	C. lavandulifolium 0033110	0.0451953	r-r-TYPE																					C. lavandulifolium 0014772	C. makinoi040634-T1	0.130617	CCA1-LIKE
C. morifolium 397.345	C. lavandulifolium 0031847	0.043394	S26																					C. lavandulifolium 0088390	C. makinoi033715-T1	0.130128	S15
C. morifolium 1546.100	C. lavandulifolium 0077450	0.0410049	S26																					C. lavandulifolium 0012263	C. makinoi044168-T1	0.129485	S7
C. morifolium 1096.7	C. lavandulifolium 0001999	0.0385738	S20																					C. lavandulifolium 0054519	C. makinoi034259-T1	0.124377	r-r-TYPE
C. morifolium 393.24	C. lavandulifolium 0057511	0.0327344	S8																					C. lavandulifolium 0007167	C. makinoi076192-T1	0.122003	S13
C. morifolium 1630.10	C. lavandulifolium 0021667	0.0256311	S8																					C. lavandulifolium 0037334	C. makinoi069015-T1	0.121196	S13
C. morifolium 11645.8	C. lavandulifolium 0001999	0.0238443	S20																					C. lavandulifolium 0072020	C. makinoi018519-T1	0.120714	CCA1-LIKE
C. morifolium 4627.4	C. lavandulifolium 0001999	0.0238443	S20																					C. lavandulifolium 0079917	C. makinoi074419-T1	0.115503	S4
C. morifolium 1099.236	C. lavandulifolium 0014446	0.0151957	S21																					C. lavandulifolium 0069459	C. makinoi034259-T1	0.114613	r-r-TYPE
C. morifolium 4461.13	C. lavandulifolium 0069459	0	r-r-TYPE																					C. lavandulifolium 0058660	C. makinoi030436-T1	0.0986052	3R
C. morifolium 4461.13	C. lavandulifolium 0054519	0	r-r-TYPE																					C. lavandulifolium 0058528	C. makinoi089196-T1	0.0969782	r-r-TYPE
C. morifolium 1521.97	C. lavandulifolium 0069459	0	r-r-TYPE																					C. lavandulifolium 0033110	C. makinoi005252-T1	0.0931843	r-r-TYPE
C. morifolium 1521.97	C. lavandulifolium 0054519	0	r-r-TYPE																					C. lavandulifolium 0046330	C. makinoi036056-T1	0.0928894	S24
C. morifolium 3999.192	C. lavandulifolium 0069459	0	r-r-TYPE																					C. lavandulifolium 0034253	C. makinoi026357-T1	0.0917695	S13
C. morifolium 3999.192	C. lavandulifolium 0054519	0	r-r-TYPE																					C. lavandulifolium 0014446	C. makinoi021521-T1	0.0870879	S21
C. morifolium 124.175	C. lavandulifolium 0034997	0	I-BOX-BINGDING																					C. lavandulifolium 0077450	C. makinoi014378-T1	0.0820503	S26
C. morifolium 927.299	C. lavandulifolium 0034997	0	I-BOX-BINGDING																					C. lavandulifolium 0088103	C. makinoi068124-T1	0.0802476	3R
C. morifolium 1588.97	C. lavandulifolium 0034997	0	I-BOX-BINGDING																					C. lavandulifolium 0005801	C. makinoi008466-T1	0.0783541	S8
C. morifolium 1588.100	C. lavandulifolium 0034997	0	I-BOX-BINGDING																					C. lavandulifolium 0078983	C. makinoi074790-T1	0.074222	S8
C. morifolium 223.363	C. lavandulifolium 0068923	0	S12																					C. lavandulifolium 0009083	C. makinoi020841-T1	0.0738758	I-BOX-BINGDING
C. morifolium 1180.328	C. lavandulifolium 0068923	0	S12																					C. lavandulifolium 0069459	C. makinoi022700-T1	0.0725018	r-r-TYPE
C. morifolium 1431.48	C. lavandulifolium 0068923	0	S12																					C. lavandulifolium 0085131	C. makinoi048803-T1	0.0704989	S5
C. morifolium 393.191	C. lavandulifolium 0070183	0	S1																					C. lavandulifolium 0057511	C. makinoi079804-T1	0.0667296	S8
C. morifolium 964.64	C. lavandulifolium 0012917	0	S13																					C. lavandulifolium 0057511	C. makinoi079805-T1	0.0667296	S8
C. morifolium 1654.5	C. lavandulifolium 0012917	0	S13																					C. lavandulifolium 0084170	C. makinoi037584-T1	0.0649427	I-BOX-BINGDING
C. morifolium 3682.68	C. lavandulifolium 0012917	0	S13																					C. lavandulifolium 0087886	C. makinoi094705-T1	0.064727	S25
C. morifolium 1560.10	C. lavandulifolium 0009083	0	I-BOX-BINGDING																					C. lavandulifolium 0069523	C. makinoi075100-T1	0.060337	S27
C. morifolium 644.507	C. lavandulifolium 0009083	0	I-BOX-BINGDING																					C. lavandulifolium 0069523	C. makinoi075098-T1	0.060337	S27
C. morifolium 9340.98	C. lavandulifolium 0009083	0	I-BOX-BINGDING																					C. lavandulifolium 0068923	C. makinoi079653-T1	0.0572901	S12
C. morifolium 453.98	C. lavandulifolium 0039031	0	S20																					C. lavandulifolium 0061716	C. makinoi026924-T1	0.0561922	S8
C. morifolium 400.112	C. lavandulifolium 0026366	0	S5																					C. lavandulifolium 0054519	C. makinoi022700-T1	0.0560965	r-r-TYPE
C. morifolium 10424.11	C. lavandulifolium 0069523	0	S27																					C. lavandulifolium 0004670	C. makinoi032319-T1	0.0546252	r-r-TYPE
C. morifolium 1365.142	C. lavandulifolium 0012234	0	S18																					C. lavandulifolium 0031847	C. makinoi036622-T1	0.0522799	S26
C. morifolium 1450.47	C. lavandulifolium 0012234	0	S18																					C. lavandulifolium 0031847	C. makinoi036625-T1	0.0522799	S26
C. morifolium 234.155	C. lavandulifolium 0084170	0	I-BOX-BINGDING																					C. lavandulifolium 0079917	C. makinoi028360-T1	0.0492723	S4
C. morifolium 2712.53	C. lavandulifolium 0084170	0	I-BOX-BINGDING																					C. lavandulifolium 0008429	C. makinoi063254-T1	0.0491732	S24
C. morifolium 1622.233	C. lavandulifolium 0061716	0	S8																					C. lavandulifolium 0004670	C. makinoi032591-T1	0.0464186	r-r-TYPE
C. morifolium 986.70	C. lavandulifolium 0053513	0	S27																					C. lavandulifolium 0036949	C. makinoi089523-T1	0.0462546	S21
C. morifolium 1617.120	C. lavandulifolium 0085245	0	S27																					C. lavandulifolium 0021135	C. makinoi038640-T1	0.0407681	r-r-TYPE
C. morifolium 1187.452	C. lavandulifolium 0063928	0	S19																					C. lavandulifolium 0035389	C. makinoi078602-T1	0.0368707	S8
C. morifolium 103.21	C. lavandulifolium 0029238	0	r-r-TYPE																					C. lavandulifolium 0021667	C. makinoi078602-T1	0.0221679	S8
C. morifolium 560.105	C. lavandulifolium 0021135	0	r-r-TYPE																					C. lavandulifolium 0072459	C. makinoi045000-T1	0.0151983	S12
C. morifolium 1303.470.3	C. lavandulifolium 0072020	0	CCA1-LIKE																					C. lavandulifolium 0070183	C. makinoi079883-T1	0	S1
C. morifolium 560.348	C. lavandulifolium 0030728	0	TBP-LIKE																					C. lavandulifolium 0012234	C. makinoi026692-T1	0	S18

## Sheet: Table S6
Table S6. The Ka/Ks gene pairs of duplicated genes in the MYB gene family among Chrysanthemum species.
Gene id_C. morifolium	Gene id_C. morifolium	Ka/Ks	Lineage
C. morifolium 2387.57	C. morifolium 2387.38	4.10799	S8
C. morifolium 1569.144	C. morifolium 2387.22	2.19956	S8
C. morifolium 3953.1	C. morifolium 2735.2	2.0086	S8
C. morifolium 3953.1	C. morifolium 11472.39	2.0086	S8
C. morifolium 1811.63	C. morifolium 1811.61	1.79059	S7
C. morifolium 1319.8	C. morifolium 6478.68	1.69478	S1
C. morifolium 9204.114	C. morifolium 508.213	1.65421	S26
C. morifolium 1111.127	C. morifolium 1111.86	1.44668	S21
C. morifolium 1742.65	C. morifolium 1742.54	1.42567	S21
C. morifolium 1281.235	C. morifolium 311.122	1.39655	I-BOX-BINGDING
C. morifolium 7475.40	C. morifolium 301.359	1.39336	3R
C. morifolium 1279.179	C. morifolium 1817.271	1.38217	S25
C. morifolium 1618.163	C. morifolium 1231.331	1.27892	S25
C. morifolium 901.18	C. morifolium 11081.169	1.21093	r-r-TYPE
C. morifolium 1111.127	C. morifolium 1111.95	1.19622	S21
C. morifolium 1111.127	C. morifolium 1111.119	1.18901	S21
C. morifolium 4610.15	C. morifolium 4876.3	1.12115	S23
C. morifolium 9832.12	C. morifolium 1806.660	1.09723	S2
C. morifolium 1622.233	C. morifolium 1622.235	1.09524	S8
C. morifolium 7959.40	C. morifolium 1612.71	1.07016	S15
C. morifolium 957.15	C. morifolium 957.20	1.05089	S23
C. morifolium 11622.5	C. morifolium 11677.4	1.04952	S7
C. morifolium asm20_new.13	C. morifolium asm20_new.21	1.04368	S7
C. morifolium 332.72	C. morifolium 1809.67	1.02512	S27
C. morifolium 1694.198	C. morifolium 914.34	1.01555	S7
C. morifolium asm20_new.13	C. morifolium asm20_new.19	1.01217	S7
C. morifolium 1477.116	C. morifolium 9050.89	1.01112	TBP-LIKE
C. morifolium 887.12	C. morifolium asm20_new.504	0.998294	S9
C. morifolium 887.12	C. morifolium 1210.4	0.998294	S9
C. morifolium 11418.61	C. morifolium asm16_new.2832	0.99261	3R
C. morifolium 1569.96	C. morifolium 1569.144	0.99107	S8
C. morifolium 4610.15	C. morifolium 8405.3	0.961575	S23
C. morifolium 414.34	C. morifolium 414.37	0.955088	S21
C. morifolium 11378.64	C. morifolium 1085.78	0.944972	S13
C. morifolium 1170.79	C. morifolium 250.69	0.926941	TBP-LIKE
C. morifolium 250.69	C. morifolium asm3_new.2221	0.926941	TBP-LIKE
C. morifolium 212.78	C. morifolium 212.89	0.921473	S6
C. morifolium 9689.30	C. morifolium 6251.1	0.912177	r-r-TYPE
C. morifolium 10401.14	C. morifolium 10401.20	0.909743	S12
C. morifolium 1111.127	C. morifolium 1111.115	0.871592	S21
C. morifolium 1312.49	C. morifolium 3309.116	0.868219	S17
C. morifolium 10264.483	C. morifolium 311.122	0.866018	I-BOX-BINGDING
C. morifolium 22.44	C. morifolium 392.52	0.862975	CPC-LIKE
C. morifolium 9340.503	C. morifolium 1146.385	0.850102	TBP-LIKE
C. morifolium 745.87	C. morifolium 1710.109	0.818892	r-r-TYPE
C. morifolium 1760.242	C. morifolium 1503.41	0.81492	S8
C. morifolium 291.36	C. morifolium 7959.40	0.811433	S15
C. morifolium 1365.130	C. morifolium 1450.26	0.794318	S24
C. morifolium 479.89	C. morifolium 419.205	0.775735	S6
C. morifolium 865.8_C. morifolium 865.16	C. morifolium 865.9	0.758833	CPC-LIKE
C. morifolium 1799.19	C. morifolium 1569.187	0.738064	S21
C. morifolium 103.21	C. morifolium 1710.109	0.736018	r-r-TYPE
C. morifolium 1489.125	C. morifolium 309.229	0.735354	S17
C. morifolium 7003.37	C. morifolium 250.532	0.734995	S21
C. morifolium 10401.11	C. morifolium 1594.158	0.731309	S12
C. morifolium 1366.101	C. morifolium 19.4	0.729673	S8
C. morifolium 1568.60	C. morifolium 1692.421	0.722024	S22
C. morifolium 2180.11	C. morifolium 1446.135	0.72175	S2
C. morifolium asm20_new.13	C. morifolium asm20_new.16	0.718055	S7
C. morifolium 184.37	C. morifolium 2680.44	0.707319	S2
C. morifolium 1312.49	C. morifolium 1312.45	0.69662	S17
C. morifolium 301.359	C. morifolium 2823.46	0.695217	3R
C. morifolium 1363.22	C. morifolium 1692.421	0.694539	S22
C. morifolium 7475.40	C. morifolium 2823.46	0.693371	3R
C. morifolium 10089.1	C. morifolium 10089.2	0.688613	S8
C. morifolium 4610.15	C. morifolium 12146.3	0.686003	S23
C. morifolium 3953.1	C. morifolium 5042.1	0.685733	S8
C. morifolium 1760.223	C. morifolium 1503.29	0.679898	S20
C. morifolium 6154.18	C. morifolium 923.126	0.67267	S19
C. morifolium 461.351	C. morifolium 1806.660	0.672241	S2
C. morifolium 2361.76	C. morifolium 1506.111	0.67089	S8
C. morifolium 737.414	C. morifolium 1275.116	0.664337	S26
C. morifolium 209.324	C. morifolium 1231.331	0.663307	S25
C. morifolium 1111.127	C. morifolium 1111.84	0.662099	S21
C. morifolium 10936.34	C. morifolium 483.44	0.658385	S7
C. morifolium 1569.96	C. morifolium 1569.136	0.654151	S8
C. morifolium 1400.220	C. morifolium 1400.140	0.653755	CPC-LIKE
C. morifolium 1477.116	C. morifolium 1874.122	0.650029	TBP-LIKE
C. morifolium 8178.151	C. morifolium 1798.23	0.644772	S27
C. morifolium 865.8_C. morifolium 865.16	C. morifolium 468.132	0.643819	CPC-LIKE
C. morifolium 1366.223	C. morifolium 19.114	0.641662	S25
C. morifolium 1266.428	C. morifolium 1446.79	0.64132	S10
C. morifolium 11826.135	C. morifolium 1267.189	0.641255	S13
C. morifolium 3959.203	C. morifolium 10683.184	0.639202	S19
C. morifolium 804.4	C. morifolium 804.2	0.637269	r-r-TYPE
C. morifolium 10818.10	C. morifolium asm13_new.2447	0.635905	S13
C. morifolium 2361.76	C. morifolium 1483.300	0.635409	S8
C. morifolium 1693.134	C. morifolium 566.171	0.63037	S15
C. morifolium 699.412	C. morifolium 1409.188	0.628595	S7
C. morifolium 1477.116	C. morifolium 1477.118	0.62444	TBP-LIKE
C. morifolium 7511.69	C. morifolium 7511.68	0.623634	S6
C. morifolium 1312.49	C. morifolium 1312.47	0.62354	S17
C. morifolium 291.36	C. morifolium 1612.71	0.621578	S15
C. morifolium 1035.22	C. morifolium 1035.26	0.620066	S7
C. morifolium 1763.57	C. morifolium 1763.17	0.617265	S8
C. morifolium 1760.258	C. morifolium 1503.55	0.616803	S8
C. morifolium asm7_new.1761	C. morifolium 118.570	0.615487	S12
C. morifolium 479.89	C. morifolium 1230.347	0.613691	S6
C. morifolium 7588.92	C. morifolium 1450.26	0.604337	S24
C. morifolium 61.299	C. morifolium 1817.149	0.600258	CCA1-LIKE
C. morifolium 1763.57	C. morifolium 1763.47	0.599293	S8
C. morifolium 3285.38	C. morifolium 117.173	0.595248	S18
C. morifolium asm20_new.16	C. morifolium 1035.28	0.591459	S7
C. morifolium 1763.57	C. morifolium 1763.36	0.59134	S8
C. morifolium 1350.26	C. morifolium 5.3	0.589022	S4
C. morifolium 644.454	C. morifolium 6499.73	0.582496	r-r-TYPE
C. morifolium 1569.96	C. morifolium 1763.57	0.575476	S8
C. morifolium 201.186	C. morifolium asm13_new.2447	0.572942	S13
C. morifolium 461.351	C. morifolium 9832.12	0.571913	S2
C. morifolium 212.78	C. morifolium 212.90	0.570306	S6
C. morifolium 209.324	C. morifolium 1618.163	0.568829	S25
C. morifolium 1085.78	C. morifolium 325.112	0.567033	S13
C. morifolium 842.50	C. morifolium 863.16	0.564103	S24
C. morifolium 10401.14	C. morifolium 10401.19	0.561331	S12
C. morifolium 1291.102	C. morifolium 443.26	0.561281	S13
C. morifolium 68.46	C. morifolium 727.220	0.556634	TBP-LIKE
C. morifolium 1275.116	C. morifolium 871.126	0.555179	S26
C. morifolium 1763.17	C. morifolium 2387.22	0.554573	S8
C. morifolium 849.71	C. morifolium 98.135	0.553993	TBP-LIKE
C. morifolium 8830.58	C. morifolium 118.570	0.553456	S12
C. morifolium 476.161	C. morifolium 1730.281	0.553289	TBP-LIKE
C. morifolium 393.191	C. morifolium 302.4	0.549641	S1
C. morifolium 393.191	C. morifolium asm16_new.140	0.549641	S1
C. morifolium 61.158	C. morifolium 1817.271	0.548935	S25
C. morifolium 364.1	C. morifolium 98.135	0.548444	TBP-LIKE
C. morifolium 4095.45	C. morifolium 1591.112	0.544296	S23
C. morifolium 590.90	C. morifolium 500.8	0.540052	CCA1-LIKE
C. morifolium 1366.81	C. morifolium 1503.41	0.540036	S8
C. morifolium 1690.49	C. morifolium 3858.162	0.535386	S12
C. morifolium 1690.49	C. morifolium asm13_new.150	0.535386	S12
C. morifolium 1594.158	C. morifolium 1594.171	0.535129	S12
C. morifolium 10089.1	C. morifolium 1503.55	0.532739	S8
C. morifolium 1763.57	C. morifolium 1763.25	0.530231	S8
C. morifolium 1371.650	C. morifolium 1463.15	0.52784	CCA1-LIKE
C. morifolium 10885.116	C. morifolium 10269.43	0.524584	S21
C. morifolium 7959.40	C. morifolium 7959.43	0.523518	S15
C. morifolium 737.414	C. morifolium 871.126	0.523344	S26
C. morifolium 67.56	C. morifolium 463.214	0.522079	S20
C. morifolium 11378.64	C. morifolium 325.112	0.521743	S13
C. morifolium 414.37	C. morifolium 1742.54	0.517562	S21
C. morifolium 927.299	C. morifolium 927.300	0.517354	I-BOX-BINGDING
C. morifolium 4355.28	C. morifolium 2161.7	0.505122	S3
C. morifolium 364.1	C. morifolium 849.71	0.504109	TBP-LIKE
C. morifolium 1569.108	C. morifolium 1763.36	0.503611	S8
C. morifolium 1180.393	C. morifolium 11506.109	0.501476	S24
C. morifolium 5577.113	C. morifolium 692.174	0.497779	S15
C. morifolium 692.174	C. morifolium asm3_new.964	0.497779	S15
C. morifolium 1763.36	C. morifolium 2387.44	0.496734	S8
C. morifolium 945.123	C. morifolium 1415.6	0.495057	r-r-TYPE
C. morifolium 1874.122	C. morifolium 1874.123	0.493018	TBP-LIKE
C. morifolium 1693.161	C. morifolium 566.215	0.488726	S8
C. morifolium 117.390	C. morifolium 117.173	0.484984	S18
C. morifolium 1594.158	C. morifolium 1594.160	0.483027	S12
C. morifolium 6033.23	C. morifolium 4838.12	0.482662	S23
C. morifolium 1284.61	C. morifolium 1501.132	0.476735	S2
C. morifolium 4355.28	C. morifolium 857.27_C. morifolium 857.28	0.475241	S3
C. morifolium 1483.300	C. morifolium 1506.111	0.470349	S8
C. morifolium 1693.150	C. morifolium 1693.144	0.459332	S15
C. morifolium 9050.89	C. morifolium 9050.88	0.458714	TBP-LIKE
C. morifolium 212.78	C. morifolium 212.80	0.458605	S6
C. morifolium 10401.11	C. morifolium 1457.400	0.457748	S12
C. morifolium 8978.22	C. morifolium 1236.59	0.453616	4R
C. morifolium 249.52	C. morifolium 3326.137	0.453187	S8
C. morifolium 590.90	C. morifolium 10592.64	0.452201	CCA1-LIKE
C. morifolium 1763.17	C. morifolium 2387.54	0.449981	S8
C. morifolium 10401.14	C. morifolium 1594.160	0.443075	S12
C. morifolium 184.37	C. morifolium 1478.194	0.442214	S2
C. morifolium 419.205	C. morifolium 1230.347	0.44012	S6
C. morifolium 1425.175	C. morifolium 692.355	0.437638	CCA1-LIKE
C. morifolium 692.355	C. morifolium asm3_new.1148	0.437638	CCA1-LIKE
C. morifolium 4532.76	C. morifolium 1147.195	0.433553	S13
C. morifolium 699.301	C. morifolium 1409.188	0.432345	S7
C. morifolium 1501.618	C. morifolium 1284.61	0.430307	S2
C. morifolium 407.77	C. morifolium 7753.67	0.429999	CCA1-LIKE
C. morifolium 957.15	C. morifolium 6033.33	0.429994	S23
C. morifolium 965.144	C. morifolium 3576.41	0.42972	S22
C. morifolium 267.67	C. morifolium 508.450	0.429091	TRF-LIKE
C. morifolium 508.450	C. morifolium asm3_new.3023	0.429091	TRF-LIKE
C. morifolium 1620.5	C. morifolium 842.50	0.428835	S24
C. morifolium 1198.339	C. morifolium 1007.337	0.427164	S7
C. morifolium asm20_new.13	C. morifolium asm20_new.23	0.425557	S7
C. morifolium 1028.108	C. morifolium 1147.195	0.424023	S13
C. morifolium 4532.76	C. morifolium 533.239	0.415329	S13
C. morifolium 1363.22	C. morifolium 1363.23	0.414252	S22
C. morifolium 1279.179	C. morifolium 61.158	0.411482	S25
C. morifolium 1187.452	C. morifolium 10683.184	0.409985	S19
C. morifolium 1569.96	C. morifolium 1569.108	0.408174	S8
C. morifolium 1811.63	C. morifolium 1811.57	0.405735	S7
C. morifolium 117.390	C. morifolium 3285.38	0.404766	S18
C. morifolium 1594.160	C. morifolium 1457.402	0.404099	S12
C. morifolium 1390.77	C. morifolium 1390.88	0.403771	S6
C. morifolium 1312.197	C. morifolium 3309.116	0.391488	S17
C. morifolium 1693.150	C. morifolium 1693.146	0.39067	S15
C. morifolium 566.197	C. morifolium 566.195	0.389665	S15
C. morifolium 1035.22	C. morifolium 1035.28	0.389157	S7
C. morifolium 247.219	C. morifolium 1810.79	0.387494	S21
C. morifolium 155.19	C. morifolium 5319.11	0.386343	S26
C. morifolium 1798.23	C. morifolium 1118.210	0.386283	S27
C. morifolium 1995.4	C. morifolium 6826.3	0.382533	S23
C. morifolium 1995.4	C. morifolium 10405.3	0.382533	S23
C. morifolium 8178.151	C. morifolium 1118.210	0.382496	S27
C. morifolium 2387.57	C. morifolium 2387.22	0.380133	S8
C. morifolium 1795.216	C. morifolium 250.69	0.378352	TBP-LIKE
C. morifolium 7854.330	C. morifolium 11263.17	0.376836	4R
C. morifolium 1240.38	C. morifolium 1760.223	0.374076	S20
C. morifolium 1319.8	C. morifolium 899.158	0.373798	S1
C. morifolium 957.24	C. morifolium 4838.12	0.371221	S23
C. morifolium 209.350	C. morifolium 1618.181	0.363955	S25
C. morifolium 1594.158	C. morifolium 1457.400	0.363372	S12
C. morifolium 1240.38	C. morifolium 1503.29	0.362593	S20
C. morifolium 1620.5	C. morifolium 863.16	0.362472	S24
C. morifolium 11826.135	C. morifolium 972.219	0.361731	S13
C. morifolium 2266.189	C. morifolium 9002.103	0.359725	TRF-LIKE
C. morifolium 1709.64	C. morifolium 1709.70	0.359635	S2
C. morifolium 5768.170	C. morifolium 1463.15	0.359448	CCA1-LIKE
C. morifolium 10424.11	C. morifolium 1809.67	0.356529	S27
C. morifolium 1679.217	C. morifolium 822.152	0.347456	3R
C. morifolium 361.167	C. morifolium 849.71	0.347262	TBP-LIKE
C. morifolium 1795.216	C. morifolium 849.71	0.345595	TBP-LIKE
C. morifolium 5768.170	C. morifolium 1371.650	0.3453	CCA1-LIKE
C. morifolium 4355.28	C. morifolium 4355.25	0.34524	S3
C. morifolium 250.69	C. morifolium 364.1	0.344732	TBP-LIKE
C. morifolium 361.167	C. morifolium 364.1	0.343284	TBP-LIKE
C. morifolium 1795.216	C. morifolium 364.1	0.341602	TBP-LIKE
C. morifolium 11263.17	C. morifolium 5811.22	0.341529	4R
C. morifolium 250.69	C. morifolium 98.135	0.340037	TBP-LIKE
C. morifolium 5424.109	C. morifolium 545.105	0.339802	TBP-LIKE
C. morifolium 1446.125	C. morifolium 1446.135	0.339556	S2
C. morifolium 11180.134	C. morifolium 225.632_C. morifolium 225.634	0.337887	CCA1-LIKE
C. morifolium 113.120	C. morifolium 212.81	0.336955	S6
C. morifolium 1795.216	C. morifolium 98.135	0.335152	TBP-LIKE
C. morifolium 2823.46	C. morifolium 11771.59	0.334821	3R
C. morifolium 1762.59	C. morifolium 965.144	0.325976	S22
C. morifolium 1670.167	C. morifolium 1014.79	0.325671	S19
C. morifolium 1670.167	C. morifolium asm16_new.6890	0.325671	S19
C. morifolium 1365.130	C. morifolium 177.8	0.324881	S24
C. morifolium 1365.130	C. morifolium 117.231	0.324881	S24
C. morifolium 1450.26	C. morifolium 177.8	0.320447	S24
C. morifolium 1450.26	C. morifolium 117.231	0.320447	S24
C. morifolium 2387.57	C. morifolium 2387.54	0.320223	S8
C. morifolium 1764.21	C. morifolium 11180.134	0.319728	CCA1-LIKE
C. morifolium 2180.11	C. morifolium 1266.372	0.318723	S2
C. morifolium 1402.158	C. morifolium 1517.2	0.314294	S8
C. morifolium 500.8	C. morifolium 10592.64	0.314253	CCA1-LIKE
C. morifolium 301.359	C. morifolium 11771.59	0.313761	3R
C. morifolium 407.77	C. morifolium 11180.134	0.312247	CCA1-LIKE
C. morifolium 952.378	C. morifolium 225.632_C. morifolium 225.634	0.312082	CCA1-LIKE
C. morifolium 7588.92	C. morifolium 177.8	0.311828	S24
C. morifolium 7588.92	C. morifolium 117.231	0.311828	S24
C. morifolium 1450.26	C. morifolium 2279.2	0.311765	S24
C. morifolium 3601.235	C. morifolium 1709.64	0.31042	S2
C. morifolium 1366.97	C. morifolium 1503.55	0.306883	S8
C. morifolium 3334.78	C. morifolium 6251.1	0.302534	r-r-TYPE
C. morifolium 7854.330	C. morifolium 5811.22	0.301344	4R
C. morifolium 1279.19	C. morifolium 1817.149	0.29952	CCA1-LIKE
C. morifolium 1568.60	C. morifolium 1363.22	0.298158	S22
C. morifolium 7511.69	C. morifolium 7511.63	0.296762	S6
C. morifolium 1187.452	C. morifolium 1134.74	0.295987	S19
C. morifolium 62.153	C. morifolium 457.28	0.295931	S2
C. morifolium 807.131	C. morifolium 1591.112	0.29355	S23
C. morifolium 1693.150	C. morifolium 566.197	0.292893	S15
C. morifolium 166.115	C. morifolium 1693.161	0.291713	S8
C. morifolium 1503.29	C. morifolium 453.98	0.289549	S20
C. morifolium 166.115	C. morifolium 9874.147	0.288603	S8
C. morifolium 2926.6	C. morifolium 5271.14	0.287481	CCA1-LIKE
C. morifolium 407.77	C. morifolium 1764.21	0.284451	CCA1-LIKE
C. morifolium 3959.203	C. morifolium 6154.18	0.283845	S19
C. morifolium 905.68	C. morifolium 668.62	0.283269	S5
C. morifolium 1291.102	C. morifolium 1291.130	0.28071	S13
C. morifolium 1760.223	C. morifolium 1597.184	0.280351	S20
C. morifolium 533.239	C. morifolium 8768.21	0.280274	S13
C. morifolium 1121.21	C. morifolium asm3_new.3246	0.278681	S13
C. morifolium 699.301	C. morifolium 699.412	0.278467	S7
C. morifolium 7475.40	C. morifolium 7475.41	0.278417	S12
C. morifolium 1390.88	C. morifolium 212.80	0.277701	S6
C. morifolium 1266.432	C. morifolium 1266.428	0.277679	S10
C. morifolium 1017.261	C. morifolium 9874.147	0.277557	S8
C. morifolium 1693.161	C. morifolium 9874.147	0.277359	S8
C. morifolium 1366.81	C. morifolium 1366.97	0.277202	S8
C. morifolium 272.233	C. morifolium 7862.37	0.27709	S8
C. morifolium 1187.452	C. morifolium 3959.203	0.274593	S19
C. morifolium 699.315	C. morifolium 1409.207	0.274126	S15
C. morifolium 1569.136	C. morifolium 1763.25	0.272343	S8
C. morifolium 1116.52	C. morifolium 1699.179	0.27212	S26
C. morifolium 1760.223	C. morifolium 453.98	0.271235	S20
C. morifolium 4866.4	C. morifolium 10284.16	0.270563	S1
C. morifolium 15.52	C. morifolium 1810.79	0.269124	S21
C. morifolium 1569.136	C. morifolium 2387.54	0.268973	S8
C. morifolium 8676.74	C. morifolium 668.62	0.268565	S5
C. morifolium 1457.400	C. morifolium 1457.402	0.268384	S12
C. morifolium 1446.77	C. morifolium 1446.79	0.267442	S10
C. morifolium 1366.223	C. morifolium 1817.271	0.266976	S25
C. morifolium 177.8	C. morifolium 2279.2	0.26466	S24
C. morifolium 2279.2	C. morifolium 117.231	0.26466	S24
C. morifolium 9204.114	C. morifolium 7365.22	0.264614	S26
C. morifolium 10683.184	C. morifolium 6154.18	0.264173	S19
C. morifolium 1366.223	C. morifolium 61.158	0.263943	S25
C. morifolium 201.186	C. morifolium 10818.10	0.263745	S13
C. morifolium 699.404	C. morifolium 1409.207	0.263703	S15
C. morifolium 366.16	C. morifolium 584.15	0.261173	S27
C. morifolium 600.39	C. morifolium 759.124	0.26071	S1
C. morifolium 1365.130	C. morifolium 7588.92	0.260442	S24
C. morifolium 1760.242	C. morifolium 1760.255	0.258538	S8
C. morifolium 1366.223	C. morifolium 1279.179	0.258236	S25
C. morifolium 3183.83	C. morifolium 1709.64	0.257709	S2
C. morifolium 10628.169	C. morifolium 1266.432	0.254999	S10
C. morifolium 10628.169	C. morifolium 1446.77	0.254535	S10
C. morifolium 628.27	C. morifolium 545.105	0.25447	TBP-LIKE
C. morifolium 1503.41	C. morifolium 1503.55	0.253718	S8
C. morifolium 407.77	C. morifolium 225.632_C. morifolium 225.634	0.253601	CCA1-LIKE
C. morifolium 1135.19	C. morifolium 9874.147	0.252022	S8
C. morifolium 11622.5	C. morifolium 11622.2	0.251518	S7
C. morifolium 1431.102	C. morifolium 1180.393	0.250575	S24
C. morifolium 1191.17	C. morifolium 1679.217	0.249538	3R
C. morifolium 244.78	C. morifolium 468.455	0.24829	S16
C. morifolium 11180.134	C. morifolium 952.378	0.248056	CCA1-LIKE
C. morifolium 1135.19	C. morifolium 566.215	0.247459	S8
C. morifolium 10269.11	C. morifolium 1659.414	0.246217	S21
C. morifolium 78.219	C. morifolium 78.171	0.246055	S2
C. morifolium 78.171	C. morifolium 3677.120	0.246055	S2
C. morifolium 1390.77	C. morifolium 1390.78	0.245309	S6
C. morifolium 87.269	C. morifolium 972.24	0.245255	S19
C. morifolium 87.269	C. morifolium asm16_new.2039	0.245255	S19
C. morifolium 1425.175	C. morifolium 284.105	0.242924	CCA1-LIKE
C. morifolium asm3_new.1148	C. morifolium 284.105	0.242924	CCA1-LIKE
C. morifolium 5577.117	C. morifolium 566.197	0.240905	S15
C. morifolium 1402.130	C. morifolium 1402.158	0.240664	S8
C. morifolium 1373.2	C. morifolium 6033.43	0.240331	S23
C. morifolium 1266.432	C. morifolium 1266.423	0.238751	S10
C. morifolium 1266.432	C. morifolium 1266.370	0.238596	S2
C. morifolium 1446.77	C. morifolium 1446.85	0.237406	S10
C. morifolium 1116.52	C. morifolium 915.259	0.237306	S26
C. morifolium 1116.52	C. morifolium 397.345	0.236923	S26
C. morifolium 11562.20	C. morifolium 4775.84	0.236905	S21
C. morifolium 10683.184	C. morifolium 923.126	0.236761	S19
C. morifolium 1644.136	C. morifolium 647.148	0.236043	S27
C. morifolium 1425.175	C. morifolium 9874.164	0.234999	CCA1-LIKE
C. morifolium 1266.432	C. morifolium 1266.372	0.233942	S2
C. morifolium 1425.175	C. morifolium 4558.3	0.23278	CCA1-LIKE
C. morifolium 5424.109	C. morifolium 1470.35	0.231561	TBP-LIKE
C. morifolium 325.112	C. morifolium 325.108	0.231059	S13
C. morifolium 5424.109	C. morifolium 175.102	0.230799	TBP-LIKE
C. morifolium 6033.43	C. morifolium 6033.33	0.230403	S23
C. morifolium 1134.74	C. morifolium 923.126	0.230021	S19
C. morifolium 6033.43	C. morifolium 6033.23	0.229991	S23
C. morifolium 8676.74	C. morifolium 905.68	0.229225	S5
C. morifolium 312.230	C. morifolium 1279.19	0.226526	CCA1-LIKE
C. morifolium 113.121	C. morifolium 113.120	0.22614	S6
C. morifolium 1124.237	C. morifolium 9043.330	0.225919	S20
C. morifolium 247.219	C. morifolium 15.52	0.225131	S21
C. morifolium 1760.242	C. morifolium 1760.258	0.224202	S8
C. morifolium 1348.248	C. morifolium 46.105	0.223485	S7
C. morifolium 600.39	C. morifolium 1371.479	0.223164	S1
C. morifolium 14.95	C. morifolium 61.158	0.222316	S25
C. morifolium 7863.5	C. morifolium 9043.330	0.221963	S20
C. morifolium 10936.34	C. morifolium 10936.35	0.221765	S7
C. morifolium 113.121	C. morifolium 212.78	0.220804	S6
C. morifolium 1097.67	C. morifolium 397.345	0.220787	S26
C. morifolium 14.95	C. morifolium 1279.179	0.220601	S25
C. morifolium 858.398	C. morifolium 457.28	0.219227	S2
C. morifolium 986.70	C. morifolium 584.15	0.21703	S27
C. morifolium 10724.5	C. morifolium 7131.41	0.216695	r-r-TYPE
C. morifolium 1142.138	C. morifolium 409.102	0.216162	TBP-LIKE
C. morifolium 1926.21	C. morifolium 647.148	0.215665	S27
C. morifolium 1474.81	C. morifolium 10936.34	0.215427	S7
C. morifolium 1474.87	C. morifolium 10936.35	0.214961	S7
C. morifolium 3183.83	C. morifolium 3601.235	0.214509	S2
C. morifolium 1762.59	C. morifolium 3576.41	0.212595	S22
C. morifolium 1617.120	C. morifolium 1644.136	0.212256	S27
C. morifolium 1517.2	C. morifolium 453.3	0.211788	S8
C. morifolium 1926.21	C. morifolium 1644.136	0.211723	S27
C. morifolium 7863.5	C. morifolium 1124.237	0.211345	S20
C. morifolium 175.102	C. morifolium 545.105	0.210684	TBP-LIKE
C. morifolium 1366.97	C. morifolium 1760.255	0.209971	S8
C. morifolium 9565.3	C. morifolium 2996.5	0.209358	S21
C. morifolium 1474.87	C. morifolium 483.44	0.209056	S7
C. morifolium 9941.49	C. morifolium 708.64	0.20861	S12
C. morifolium 14.95	C. morifolium 19.114	0.208609	S25
C. morifolium 10628.168	C. morifolium 10628.169	0.207212	S10
C. morifolium 1266.432	C. morifolium 1446.77	0.206211	S10
C. morifolium 1366.81	C. morifolium 1366.106	0.204626	S8
C. morifolium 175.102	C. morifolium 628.27	0.204309	TBP-LIKE
C. morifolium 2416.5	C. morifolium 628.27	0.204309	TBP-LIKE
C. morifolium 1470.35	C. morifolium 628.27	0.204226	TBP-LIKE
C. morifolium 1097.265	C. morifolium 1116.217	0.204203	S8
C. morifolium 451.51	C. morifolium 1279.19	0.20336	CCA1-LIKE
C. morifolium 1366.81	C. morifolium 1760.242	0.201727	S8
C. morifolium 1926.21	C. morifolium 11771.308	0.201657	S27
C. morifolium 8037.69	C. morifolium 800.200	0.201198	S17
C. morifolium 3334.78	C. morifolium 9689.30	0.201115	r-r-TYPE
C. morifolium 483.44	C. morifolium 483.46	0.200713	S7
C. morifolium 11081.169	C. morifolium 1021.184	0.200511	r-r-TYPE
C. morifolium 533.239	C. morifolium 1147.195	0.200332	S13
C. morifolium 1000.290	C. morifolium 644.454	0.199778	r-r-TYPE
C. morifolium 1617.120	C. morifolium 647.148	0.199488	S27
C. morifolium 393.191	C. morifolium 1319.8	0.199457	S1
C. morifolium 846.54	C. morifolium 1693.395	0.198683	S2
C. morifolium 451.51	C. morifolium 1817.149	0.198492	CCA1-LIKE
C. morifolium 1654.148	C. morifolium 6658.49	0.198384	S10
C. morifolium 3417.11	C. morifolium 24.41	0.198093	S5
C. morifolium 1517.2	C. morifolium 303.1	0.198084	S8
C. morifolium 1366.81	C. morifolium 1366.101	0.198076	S8
C. morifolium 451.51	C. morifolium 61.299	0.196636	CCA1-LIKE
C. morifolium 1474.87	C. morifolium 1474.81	0.196299	S7
C. morifolium 1400.523	C. morifolium 644.454	0.195297	r-r-TYPE
C. morifolium 1085.78	C. morifolium 1085.85	0.195071	S13
C. morifolium 846.54	C. morifolium 1693.437	0.195038	S2
C. morifolium 1617.120	C. morifolium 11771.308	0.194948	S27
C. morifolium 1180.393	C. morifolium 863.16	0.19411	S24
C. morifolium 1085.78	C. morifolium 1085.82	0.193936	S13
C. morifolium 1390.77	C. morifolium 212.78	0.192985	S6
C. morifolium 957.15	C. morifolium 957.24	0.192465	S23
C. morifolium 1431.102	C. morifolium 1620.5	0.192266	S24
C. morifolium 500.295	C. morifolium 381.129	0.192069	S16
C. morifolium 5577.113	C. morifolium 5577.117	0.192004	S15
C. morifolium asm3_new.964	C. morifolium asm3_new.968	0.192004	S15
C. morifolium 250.617	C. morifolium 1693.395	0.191787	S2
C. morifolium 1693.395	C. morifolium 1693.437	0.190615	S2
C. morifolium 1660.92	C. morifolium 468.455	0.190297	S16
C. morifolium 1390.77	C. morifolium 1390.83	0.190137	S6
C. morifolium 6033.33	C. morifolium 4838.7	0.190001	S23
C. morifolium 1373.2	C. morifolium 4838.7	0.189634	S23
C. morifolium 858.398	C. morifolium 62.153	0.188235	S2
C. morifolium 1327.74	C. morifolium 2266.189	0.188125	TRF-LIKE
C. morifolium 250.617	C. morifolium 1693.437	0.188049	S2
C. morifolium 393.191	C. morifolium 6478.68	0.186726	S1
C. morifolium 1191.17	C. morifolium 822.152	0.185878	3R
C. morifolium 846.54	C. morifolium 1659.241	0.185766	S2
C. morifolium 1180.393	C. morifolium 842.50	0.184591	S24
C. morifolium 2387.57	C. morifolium 2387.44	0.183834	S8
C. morifolium 1431.102	C. morifolium 863.16	0.18379	S24
C. morifolium 212.78	C. morifolium 212.81	0.18324	S6
C. morifolium 1566.29	C. morifolium 1226.2	0.18308	S8
C. morifolium 361.167	C. morifolium 1795.216	0.180177	TBP-LIKE
C. morifolium 250.617	C. morifolium 1659.241	0.178959	S2
C. morifolium 393.191	C. morifolium 899.158	0.17766	S1
C. morifolium 764.299	C. morifolium 536.136	0.177451	S21
C. morifolium 1451.103	C. morifolium 536.136	0.17717	S21
C. morifolium 1660.263	C. morifolium 1028.178	0.176494	TBP-LIKE
C. morifolium 302.4	C. morifolium 1319.8	0.175707	S1
C. morifolium 1431.102	C. morifolium 842.50	0.174605	S24
C. morifolium 383.90	C. morifolium 1548.116	0.174386	CCA1-LIKE
C. morifolium 8286.351	C. morifolium 644.454	0.173805	r-r-TYPE
C. morifolium 1736.200	C. morifolium 399.30	0.172885	S16
C. morifolium 1142.138	C. morifolium 5234.52	0.172352	TBP-LIKE
C. morifolium 692.174	C. morifolium 692.177	0.17173	S15
C. morifolium 1644.136	C. morifolium 11771.308	0.171452	S27
C. morifolium 393.6	C. morifolium 1463.15	0.168635	CCA1-LIKE
C. morifolium 1634.39	C. morifolium 871.126	0.167765	S26
C. morifolium 248.19	C. morifolium 5768.170	0.166447	CCA1-LIKE
C. morifolium 1431.102	C. morifolium 11506.109	0.166093	S24
C. morifolium 155.19	C. morifolium 871.126	0.165966	S26
C. morifolium 694.75	C. morifolium 800.200	0.163984	S17
C. morifolium 302.4	C. morifolium 6478.68	0.163922	S1
C. morifolium 1483.300	C. morifolium asm20_new.1540	0.163797	S8
C. morifolium 7131.41	C. morifolium 462.14	0.162733	r-r-TYPE
C. morifolium 1763.47	C. morifolium 2387.57	0.162173	S8
C. morifolium 972.219	C. morifolium 1267.189	0.161568	S13
C. morifolium 1566.29	C. morifolium 629.219	0.161121	S8
C. morifolium 1266.432	C. morifolium 1266.358	0.160831	S2
C. morifolium 381.129	C. morifolium 255.44	0.159748	S16
C. morifolium 302.4	C. morifolium 899.158	0.159196	S1
C. morifolium 1060.13	C. morifolium 914.34	0.156342	S7
C. morifolium 1060.13	C. morifolium 1694.198	0.155553	S7
C. morifolium 499.194	C. morifolium 400.112	0.155453	S5
C. morifolium 2361.76	C. morifolium 1046.43	0.154471	S8
C. morifolium 1874.122	C. morifolium 9050.89	0.154027	TBP-LIKE
C. morifolium 1451.103	C. morifolium 1445.85	0.153836	S21
C. morifolium 764.299	C. morifolium 1445.85	0.153765	S21
C. morifolium 4838.7	C. morifolium 4838.12	0.151461	S23
C. morifolium 46.105	C. morifolium 10936.34	0.150662	S7
C. morifolium 1757.40	C. morifolium 940.37	0.15055	S4
C. morifolium 940.37	C. morifolium 518.474	0.15055	S4
C. morifolium 2361.76	C. morifolium asm20_new.1540	0.150209	S8
C. morifolium 901.18	C. morifolium 1021.184	0.15001	r-r-TYPE
C. morifolium 1548.116	C. morifolium 1796.111	0.150005	CCA1-LIKE
C. morifolium 1660.92	C. morifolium 244.78	0.148734	S16
C. morifolium 7437.24	C. morifolium 250.308	0.14857	r-r-TYPE
C. morifolium 250.308	C. morifolium asm3_new.1945	0.14857	r-r-TYPE
C. morifolium 5424.109	C. morifolium 628.27	0.14847	TBP-LIKE
C. morifolium 4095.45	C. morifolium 807.131	0.14805	S23
C. morifolium 1017.261	C. morifolium 1135.19	0.147955	S8
C. morifolium 8788.19	C. morifolium 11771.59	0.147638	3R
C. morifolium 5738.2	C. morifolium 11816.206	0.147455	r-r-TYPE
C. morifolium 1634.39	C. morifolium 1275.116	0.147275	S26
C. morifolium 393.6	C. morifolium 1371.650	0.147186	CCA1-LIKE
C. morifolium 10818.10	C. morifolium 325.108	0.146846	S13
C. morifolium 46.105	C. morifolium 483.44	0.146658	S7
C. morifolium 1116.217	C. morifolium 629.219	0.146635	S8
C. morifolium 1525.131	C. morifolium 914.34	0.146372	S7
C. morifolium 11771.308	C. morifolium 647.148	0.146204	S27
C. morifolium 1525.131	C. morifolium 1694.198	0.145578	S7
C. morifolium 1454.215	C. morifolium 1445.85	0.145206	S21
C. morifolium 11378.72	C. morifolium 10818.10	0.144927	S13
C. morifolium 201.186	C. morifolium 325.108	0.144648	S13
C. morifolium 1116.217	C. morifolium 1566.29	0.144487	S8
C. morifolium 737.414	C. morifolium 1634.39	0.144165	S26
C. morifolium 155.19	C. morifolium 1275.116	0.144109	S26
C. morifolium 1000.290	C. morifolium 1400.523	0.143776	r-r-TYPE
C. morifolium 1116.217	C. morifolium 1226.2	0.143432	S8
C. morifolium 1348.248	C. morifolium 10936.34	0.14261	S7
C. morifolium 103.21	C. morifolium 462.14	0.141645	r-r-TYPE
C. morifolium 737.414	C. morifolium 155.19	0.141026	S26
C. morifolium 12199.33	C. morifolium 460.13	0.140326	TBP-LIKE
C. morifolium 899.158	C. morifolium 6478.68	0.13944	S1
C. morifolium 11771.59	C. morifolium 1703.32	0.139328	3R
C. morifolium 1291.130	C. morifolium 443.26	0.139172	S13
C. morifolium 764.299	C. morifolium 11350.23	0.139103	S21
C. morifolium 479.173	C. morifolium 1230.459	0.139009	S21
C. morifolium 566.215	C. morifolium 9874.147	0.138508	S8
C. morifolium 103.21	C. morifolium 7131.41	0.137559	r-r-TYPE
C. morifolium 499.194	C. morifolium 537.26	0.137283	S5
C. morifolium 393.191	C. morifolium 600.39	0.13689	S1
C. morifolium 302.4	C. morifolium 600.39	0.136708	S1
C. morifolium asm16_new.140	C. morifolium 600.39	0.136708	S1
C. morifolium asm7_new.212	C. morifolium 1311.33	0.136495	S1
C. morifolium 123.4	C. morifolium 1311.33	0.136495	S1
C. morifolium 537.34	C. morifolium 400.108	0.136151	TBP-LIKE
C. morifolium 1348.248	C. morifolium 483.44	0.136142	S7
C. morifolium 393.191	C. morifolium 759.124	0.134171	S1
C. morifolium 302.4	C. morifolium 759.124	0.133951	S1
C. morifolium asm16_new.140	C. morifolium 759.124	0.133951	S1
C. morifolium 1226.2	C. morifolium 629.219	0.133516	S8
C. morifolium 201.186	C. morifolium 1085.82	0.133266	S13
C. morifolium 10818.10	C. morifolium 1085.82	0.132979	S13
C. morifolium 1451.103	C. morifolium 11350.23	0.132403	S21
C. morifolium 1709.70	C. morifolium 457.28	0.132348	S2
C. morifolium 302.4	C. morifolium 1371.479	0.132299	S1
C. morifolium asm16_new.140	C. morifolium 1371.479	0.132299	S1
C. morifolium 1454.215	C. morifolium 11350.23	0.130163	S21
C. morifolium 24.248	C. morifolium 380.14	0.129423	S20
C. morifolium 960.142	C. morifolium 399.30	0.129124	S16
C. morifolium 7588.103	C. morifolium 1450.47	0.128867	S18
C. morifolium 1693.437	C. morifolium 1659.241	0.128341	S2
C. morifolium 7588.103	C. morifolium 117.173	0.128332	S18
C. morifolium 1230.459	C. morifolium 1099.236	0.128051	S21
C. morifolium 3601.235	C. morifolium 457.28	0.127837	S2
C. morifolium 10779.65	C. morifolium 11125.110	0.127769	S26
C. morifolium 383.90	C. morifolium 1796.111	0.127302	CCA1-LIKE
C. morifolium 3601.235	C. morifolium 62.153	0.127058	S2
C. morifolium 3601.235	C. morifolium 858.398	0.126426	S2
C. morifolium 1134.74	C. morifolium 6154.18	0.125415	S19
C. morifolium 1348.248	C. morifolium 1474.81	0.124616	S7
C. morifolium 1450.47	C. morifolium 117.173	0.123685	S18
C. morifolium 1709.64	C. morifolium 858.398	0.122712	S2
C. morifolium 113.121	C. morifolium 1390.77	0.121485	S6
C. morifolium 1060.13	C. morifolium 1409.188	0.120599	S7
C. morifolium 1709.70	C. morifolium 62.153	0.119869	S2
C. morifolium 46.105	C. morifolium 1474.81	0.119751	S7
C. morifolium 1262.204	C. morifolium 397.345	0.118406	S26
C. morifolium 701.41	C. morifolium 1386.67	0.117979	S25
C. morifolium 3183.83	C. morifolium 858.398	0.117474	S2
C. morifolium 1693.395	C. morifolium 1659.241	0.115347	S2
C. morifolium 479.173	C. morifolium 1099.236	0.115248	S21
C. morifolium 2926.6	C. morifolium 1780.13	0.114898	CCA1-LIKE
C. morifolium 8760.78	C. morifolium 1462.73	0.11476	S13
C. morifolium 699.301	C. morifolium 1694.198	0.112045	S7
C. morifolium 10424.11	C. morifolium 332.72	0.111878	S27
C. morifolium 284.105	C. morifolium 4558.3	0.111181	CCA1-LIKE
C. morifolium 166.115	C. morifolium 1135.19	0.11022	S8
C. morifolium 1366.223	C. morifolium 14.95	0.109808	S25
C. morifolium 1569.96	C. morifolium 2387.57	0.108366	S8
C. morifolium 1386.67	C. morifolium 12245.29	0.108179	S25
C. morifolium 1097.265	C. morifolium 1425.84	0.107785	S8
C. morifolium 1454.215	C. morifolium 764.299	0.107199	S21
C. morifolium 699.412	C. morifolium 1694.198	0.105408	S7
C. morifolium 1525.131	C. morifolium 1409.188	0.104955	S7
C. morifolium 1120.118	C. morifolium 1166.126	0.10447	S26
C. morifolium 1097.67	C. morifolium 1116.52	0.103516	S26
C. morifolium 960.142	C. morifolium 1736.200	0.10297	S16
C. morifolium 1445.85	C. morifolium 11350.23	0.102704	S21
C. morifolium 8788.19	C. morifolium 1703.32	0.1026	3R
C. morifolium 7437.24	C. morifolium 3999.192	0.101938	r-r-TYPE
C. morifolium 7588.103	C. morifolium 3285.38	0.101737	S18
C. morifolium 419.299	C. morifolium 1099.236	0.101264	S21
C. morifolium 665.91	C. morifolium 1166.126	0.101178	S26
C. morifolium 699.301	C. morifolium 914.34	0.100778	S7
C. morifolium 7437.24	C. morifolium 4461.13	0.100412	r-r-TYPE
C. morifolium 7588.103	C. morifolium 117.390	0.0996648	S18
C. morifolium 694.75	C. morifolium 8037.69	0.0996249	S17
C. morifolium 1262.204	C. morifolium 915.259	0.0994924	S26
C. morifolium 4532.76	C. morifolium 1028.108	0.0987557	S13
C. morifolium 1365.142	C. morifolium 3285.38	0.0974853	S18
C. morifolium 708.64	C. morifolium 5318.98	0.0964576	S12
C. morifolium 701.41	C. morifolium 12245.29	0.0963588	S25
C. morifolium 1365.142	C. morifolium 117.390	0.0955046	S18
C. morifolium 665.91	C. morifolium 1120.118	0.094357	S26
C. morifolium 9941.49	C. morifolium 5318.98	0.0938817	S12
C. morifolium 1450.47	C. morifolium 3285.38	0.0936435	S18
C. morifolium 821.284	C. morifolium 1425.84	0.0920295	S8
C. morifolium 1450.47	C. morifolium 117.390	0.0917409	S18
C. morifolium 250.308	C. morifolium 3999.192	0.0916474	r-r-TYPE
C. morifolium 1462.73	C. morifolium 1462.8	0.090694	S13
C. morifolium 250.308	C. morifolium 4461.13	0.0904068	r-r-TYPE
C. morifolium 1454.215	C. morifolium 1451.103	0.0892271	S21
C. morifolium 1273.35	C. morifolium 271.527	0.0890334	3R
C. morifolium 1688.135	C. morifolium 271.527	0.0890334	3R
C. morifolium 1085.82	C. morifolium 325.108	0.0878812	S13
C. morifolium 5057.10	C. morifolium 9340.98	0.0874235	I-BOX-BINGDING
C. morifolium 479.173	C. morifolium 419.299	0.0873255	S21
C. morifolium 1028.108	C. morifolium 5118.9	0.0859736	S13
C. morifolium 5057.10	C. morifolium 644.507	0.0809905	I-BOX-BINGDING
C. morifolium 1617.120	C. morifolium 1926.21	0.0802741	S27
C. morifolium 4532.76	C. morifolium 5118.9	0.0799472	S13
C. morifolium 915.259	C. morifolium 397.345	0.0748837	S26
C. morifolium 8500.70	C. morifolium 1729.9	0.074633	CCA1-LIKE
C. morifolium 915.259	C. morifolium 1699.179	0.0742493	S26
C. morifolium 1534.303	C. morifolium 704.31	0.0728478	TBP-LIKE
C. morifolium 1365.142	C. morifolium 7588.103	0.0724071	S18
C. morifolium 419.299	C. morifolium 1230.459	0.0697158	S21
C. morifolium 745.87	C. morifolium 103.21	0.0684501	r-r-TYPE
C. morifolium 8760.78	C. morifolium 1462.8	0.0667913	S13
C. morifolium 10779.65	C. morifolium 9627.158	0.0656972	S26
C. morifolium 821.284	C. morifolium 1116.217	0.0608421	S8
C. morifolium 1327.74	C. morifolium 9002.103	0.0606655	TRF-LIKE
C. morifolium 451.51	C. morifolium 312.230	0.0544056	CCA1-LIKE
C. morifolium 11125.110	C. morifolium 9627.158	0.0516861	S26
C. morifolium 1617.45	C. morifolium 987.409	0.0515845	S12
C. morifolium 1000.290	C. morifolium 8286.351	0.04911	r-r-TYPE
C. morifolium 811.323	C. morifolium 1727.232	0.0490279	S10
C. morifolium 1425.84	C. morifolium 1116.217	0.0489795	S8
C. morifolium 1534.303	C. morifolium 1534.27	0.0478623	TBP-LIKE
C. morifolium 4627.4	C. morifolium 1096.7	0.0443977	S20
C. morifolium 811.343	C. morifolium 1727.232	0.0441256	S10
C. morifolium 1546.100	C. morifolium 985.241	0.0408818	S26
C. morifolium 1546.100	C. morifolium 3547.4	0.0408818	S26
C. morifolium 413.144	C. morifolium 1630.10	0.0374521	S8
C. morifolium 1400.523	C. morifolium 8286.351	0.0348391	r-r-TYPE
C. morifolium 1630.10	C. morifolium 472.19	0.0325965	S8
C. morifolium 1630.10	C. morifolium 12079.3	0.0325179	S8
C. morifolium 1046.43	C. morifolium asm20_new.1540	0.0297057	S8
C. morifolium 1046.43	C. morifolium 1458.41	0.0297057	S8
C. morifolium 9340.601	C. morifolium 1099.236	0.0232016	S21
C. morifolium 811.343	C. morifolium 811.323	0.0219698	S10
C. morifolium 413.144	C. morifolium 472.19	0.0144427	S8
C. morifolium 5271.14	C. morifolium 1780.13	0.0120809	CCA1-LIKE
C. morifolium 927.299	C. morifolium 124.175	0	I-BOX-BINGDING
C. morifolium 1273.35	C. morifolium 1688.135	0	3R
C. morifolium 927.299	C. morifolium 1588.97	0	I-BOX-BINGDING
C. morifolium 124.175	C. morifolium 1588.97	0	I-BOX-BINGDING
C. morifolium 1431.48	C. morifolium 1180.328	0	S12
C. morifolium 1525.131	C. morifolium 1060.13	0	S7
C. morifolium 1746.109	C. morifolium 2066.42	0	r-r-TYPE
C. morifolium 1402.59	C. morifolium 453.98	0	S20
C. morifolium 964.64	C. morifolium 3682.68	0	S13
C. morifolium 1431.48	C. morifolium 223.363	0	S12
C. morifolium 1180.328	C. morifolium 223.363	0	S12
C. morifolium 1402.59	C. morifolium 1597.184	0	S20
C. morifolium 453.98	C. morifolium 1597.184	0	S20
C. morifolium 964.64	C. morifolium 1654.5	0	S13
C. morifolium 3682.68	C. morifolium 1654.5	0	S13
C. morifolium 283.33	C. morifolium 468.132	0	CPC-LIKE
C. morifolium 1005.271	C. morifolium 2432.15	0	S2
C. morifolium 1017.261	C. morifolium 166.115	0	S8
C. morifolium 1451.103	C. morifolium 764.299	0	S21
C. morifolium 1262.204	C. morifolium 1097.67	0	S26
C. morifolium 1365.142	C. morifolium 1450.47	0	S18
C. morifolium 1266.372	C. morifolium 1446.125	0	S2
C. morifolium 1534.27	C. morifolium 704.31	0	TBP-LIKE
C. morifolium 537.26	C. morifolium 400.112	0	S5
C. morifolium 409.102	C. morifolium 5234.52	0	TBP-LIKE
C. morifolium 598.709	C. morifolium 1270.162	0	I-BOX-BINGDING
C. morifolium 1530.130	C. morifolium 1270.162	0	I-BOX-BINGDING
C. morifolium 2947.10	C. morifolium 311.314	0	S2
C. morifolium 909.182	C. morifolium 216.312	0	I-BOX-BINGDING
C. morifolium 560.105	C. morifolium 216.61	0	r-r-TYPE
C. morifolium 311.314	C. morifolium asm3_new.2345	0	S2
C. morifolium 397.345	C. morifolium 1699.179	0	S26
C. morifolium 2712.53	C. morifolium 234.155	0	I-BOX-BINGDING
C. morifolium 216.312	C. morifolium 560.336	0	I-BOX-BINGDING
C. morifolium 560.105	C. morifolium 919.34	0	r-r-TYPE
C. morifolium 216.61	C. morifolium 919.34	0	r-r-TYPE
C. morifolium 9340.98	C. morifolium 644.507	0	I-BOX-BINGDING
C. morifolium 3999.192	C. morifolium 4461.13	0	r-r-TYPE
C. morifolium 9340.98	C. morifolium 1560.10	0	I-BOX-BINGDING
C. morifolium 644.507	C. morifolium 1560.10	0	I-BOX-BINGDING
C. morifolium 3999.192	C. morifolium 1521.97	0	r-r-TYPE
C. morifolium 4461.13	C. morifolium 1521.97	0	r-r-TYPE
C. morifolium asm20_new.13	C. morifolium asm20_new.14	0	S7
C. morifolium 11622.5	C. morifolium 11622.4	0	S7
C. morifolium 1035.22	C. morifolium 1035.24	0	S7
C. morifolium 822.22	C. morifolium 822.155	0	S19

## Sheet: Table S7
Table S7. Statistics on the number of motifs in the sequences of the positive selected genes.
Motifs	Number
motf3	23
motif2	21
motif1	20
motif4	17
motif10	17
motif7	13
motif8	5
motif13	2
motif11	2
motif12	2
motif16	2
motif9	2
motif15	1
motif5	1

## Sheet: Table S8
Table S8. Classification and generation methods of gene lineages with different expression patterns.
Cluster	Gene_id	Subgroups	Lineages	Duplication Events	Ka/Ks (vs. C. lavandulifolium)
Cluster A1	C. morifolium 1670.167	R2R3	S19	polyploidization	0.78931
	C. morifolium 98.135	1R	TBP-LIKE	polyploidization	0.316465
	C. morifolium 12287.102	R2R3	S4	transposon mediated duplication	0.0623416
	C. morifolium 234.155	1R	I-BOX-BINGDING	polyploidization	0
	C. morifolium 175.102	1R	TBP-LIKE	polyploidization
	C. morifolium 216.61	1R	r-r-TYPE	polyploidization
	C. morifolium asm3new.2345	R2R3	S2	polyploidization
	C. morifolium 123.4	R2R3	S1	polyploidization
	C. morifolium asm16new.6890	R2R3	S19	polyploidization
Cluster A2	C. morifolium 1742.65	R2R3	S21	tandem duplication	0.765153
	C. morifolium 3601.235	R2R3	S2	polyploidization	0.539551
	C. morifolium 5768.170	1R	CCA1-LIKE	polyploidization	0.467796
	C. morifolium 4838.12	R2R3	S23	polyploidization	0.435744
	C. morifolium 479.173	R2R3	S21	polyploidization	0.402403
	C. morifolium 1729.9	1R	CCA1-LIKE	polyploidization	0.334362
	C. morifolium 6154.18	R2R3	S19	polyploidization	0.316814
	C. morifolium 457.28	R2R3	S2	polyploidization	0.256283
	C. morifolium 1005.271	R2R3	S2	polyploidization	0.23574
	C. morifolium 1266.432	R2R3	S10	polyploidization	0.234978
	C. morifolium 14.95	R2R3	S25	polyploidization	0.215481
	C. morifolium 383.90	1R	CCA1-LIKE	polyploidization	0.130248
	C. morifolium 8760.78	R2R3	S13	polyploidization	0.101769
	C. morifolium 8768.21	R2R3	S13	segmental duplication	0.0729041
	C. morifolium 764.299	R2R3	S21	polyploidization	0.0725285
	C. morifolium 451.51	1R	CCA1-LIKE	polyploidization	0.0626853
	C. morifolium 1099.236	R2R3	S21	polyploidization	0.0151957
	C. morifolium 4461.13	1R	r-r-TYPE	polyploidization	0
	C. morifolium 1445.85	R2R3	S21	polyploidization
	C. morifolium 1926.21	R2R3	S27	polyploidization
	C. morifolium 1764.21	1R	CCA1-LIKE	polyploidization
	C. morifolium 483.46	R2R3	S7	tandem duplication
	C. morifolium 1279.179	R2R3	S25	polyploidization
	C. morifolium 518.474	R2R3	S4	polyploidization
	C. morifolium 1780.13	1R	CCA1-LIKE	polyploidization
	C. morifolium 414.37	R2R3	S21	polyploidization
	C. morifolium 1796.111	1R	CCA1-LIKE	polyploidization
	C. morifolium 957.24	R2R3	S23	polyploidization
	C. morifolium 811.323	R2R3	S10	polyploidization
	C. morifolium asm16new.2039	R2R3	S19	polyploidization
	C. morifolium 1693.437	R2R3	S2	polyploidization
	C. morifolium 1634.39	R2R3	S26	polyploidization
Cluster A3	C. morifolium 409.102	1R	TBP-LIKE	polyploidization	0.75428
	C. morifolium 10592.64	1R	CCA1-LIKE	polyploidization	0.459736
	C. morifolium 24.248	R2R3	S20	polyploidization	0.430255
	C. morifolium 1363.22	R2R3	S22	polyploidization	0.345683
	C. morifolium 284.105	1R	CCA1-LIKE	polyploidization	0.337965
	C. morifolium 248.19	1R	CCA1-LIKE	segmental duplication	0.304083
	C. morifolium 1678.244	1R	r-r-TYPE	transposon mediated duplication	0.29994
	C. morifolium 5318.98	R2R3	S12	polyploidization	0.0560043
	C. morifolium 462.14	1R	r-r-TYPE	polyploidization	0.0451953
	C. morifolium 964.64	R2R3	S13	polyploidization	0
	C. morifolium 223.363	R2R3	S12	polyploidization	0
	C. morifolium 1386.67	R2R3	S25	polyploidization
	C. morifolium 7863.5	R2R3	S20	polyploidization
	C. morifolium 1400.64	1R	CPC-LIKE	transposon mediated duplication
	C. morifolium 1534.27	1R	TBP-LIKE	polyploidization
	C. morifolium 8286.351	1R	r-r-TYPE	polyploidization
	C. morifolium 499.190	1R	TBP-LIKE	transposon mediated duplication
	C. morifolium asm20_new.1011	1R	CCA1-LIKE	transposon mediated duplication
	C. morifolium 1730.281	1R	TBP-LIKE	polyploidization
	C. morifolium 1303.470	1R	CCA1-LIKE	transposon mediated duplication
	C. morifolium 9050.89	1R	TBP-LIKE	polyploidization
	C. morifolium 909.182	1R	I-BOX-BINGDING	polyploidization
	C. morifolium 476.161	1R	TBP-LIKE	polyploidization
	C. morifolium asm3new.3023	1R	TRF-LIKE	polyploidization
	C. morifolium 1506.111	R2R3	S8	polyploidization
	C. morifolium 68.46	1R	TBP-LIKE	polyploidization
	C. morifolium 1710.109	1R	r-r-TYPE	polyploidization
	C. morifolium 11378.64	R2R3	S13	polyploidization
	C. morifolium asm13new.150	R2R3	S12	polyploidization
	C. morifolium 250.308	1R	r-r-TYPE	polyploidization
	C. morifolium 468.455	R2R3	S16	polyploidization
Cluster A4	C. morifolium 485.66	R2R3	S7	transposon mediated duplication	1.01553
	C. morifolium 1795.216	1R	TBP-LIKE	polyploidization	0.578097
	C. morifolium 901.18	1R	r-r-TYPE	polyploidization	0.553104
	C. morifolium 393.191	R2R3	S1	polyploidization	0
	C. morifolium 67.113	R2R3	S1	tandem duplication
	C. morifolium 1425.84	R2R3	S8	polyploidization
	C. morifolium 1371.479	R2R3	S1	polyploidization
	C. morifolium 727.220	1R	TBP-LIKE	polyploidization
	C. morifolium 692.355	1R	CCA1-LIKE	polyploidization
	C. morifolium asm3new.1148	1R	CCA1-LIKE	polyploidization
	C. morifolium 965.144	R2R3	S22	polyploidization
	C. morifolium 940.37	R2R3	S4	polyploidization
	C. morifolium 113.119	R2R3	S6	transposon mediated duplication
	C. morifolium 15.52	R2R3	S21	polyploidization
	C. morifolium 419.299	R2R3	S21	polyploidization
	C. morifolium 11562.20	R2R3	S21	polyploidization
Cluster B1	C. morifolium 1670.167	R2R3	S19	polyploidization	0.78931
	C. morifolium 1742.65	R2R3	S21	tandem duplication	0.765153
	C. morifolium 1390.88	R2R3	S6	polyploidization	0.672735
	C. morifolium 1198.339	R2R3	S7	polyploidization	0.598879
	C. morifolium 3601.235	R2R3	S2	polyploidization	0.539551
	C. morifolium 1371.650	1R	CCA1-LIKE	polyploidization	0.474269
	C. morifolium 5768.170	1R	CCA1-LIKE	polyploidization	0.467796
	C. morifolium 479.173	R2R3	S21	polyploidization	0.402403
	C. morifolium 1729.9	1R	CCA1-LIKE	polyploidization	0.334362
	C. morifolium 6154.18	R2R3	S19	polyploidization	0.316814
	C. morifolium 98.135	1R	TBP-LIKE	polyploidization	0.316465
	C. morifolium 849.71	1R	TBP-LIKE	polyploidization	0.299575
	C. morifolium 457.28	R2R3	S2	polyploidization	0.256283
	C. morifolium 699.412	R2R3	S7	polyploidization	0.238183
	C. morifolium 1390.83	R2R3	S6	tandem duplication	0.182834
	C. morifolium 1474.87	R2R3	S7	polyploidization	0.168305
	C. morifolium 383.90	1R	CCA1-LIKE	polyploidization	0.130248
	C. morifolium 451.51	1R	CCA1-LIKE	polyploidization	0.0626853
	C. morifolium 12287.102	R2R3	S4	transposon mediated duplication	0.0623416
	C. morifolium 1099.236	R2R3	S21	polyploidization	0.0151957
	C. morifolium 923.126	R2R3	S19	polyploidization
	C. morifolium 361.167	1R	TBP-LIKE	polyploidization
	C. morifolium 1796.111	1R	CCA1-LIKE	polyploidization
	C. morifolium 413.144	R2R3	S8	polyploidization
	C. morifolium 1530.130	1R	I-BOX-BINGDING	polyploidization
	C. morifolium 11562.20	R2R3	S21	polyploidization
	C. morifolium 598.709	1R	I-BOX-BINGDING	polyploidization
	C. morifolium 1230.459	R2R3	S21	polyploidization
	C. morifolium 364.1	1R	TBP-LIKE	polyploidization
	C. morifolium 419.299	R2R3	S21	polyploidization
	C. morifolium 1548.116	1R	CCA1-LIKE	polyploidization
	C. morifolium 9340.601	R2R3	S21	polyploidization
	C. morifolium 4775.84	R2R3	S21	polyploidization
	C. morifolium 483.46	R2R3	S7	tandem duplication
	C. morifolium 811.323	R2R3	S10	polyploidization
	C. morifolium 5738.2	1R	r-r-TYPE	polyploidization
	C. morifolium 212.90	R2R3	S6	tandem duplication
	C. morifolium 10936.35	R2R3	S7	polyploidization
	C. morifolium 1390.78	R2R3	S6	tandem duplication
	C. morifolium 1639.55	1R	CCA1-LIKE	transposon mediated duplication
	C. morifolium 1679.315	R2R3	S19	polyploidization
	C. morifolium 1474.81	R2R3	S7	polyploidization
	C. morifolium 1688.135	3R	3R	polyploidization
	C. morifolium 822.22	R2R3	S19	polyploidization
	C. morifolium 1012.108	R2R3	S19	transposon mediated duplication
	C. morifolium 822.155	R2R3	S19	tandem duplication
	C. morifolium 311.314	R2R3	S2	polyploidization
	C. morifolium 483.44	R2R3	S7	polyploidization
	C. morifolium asm16_new.6890	R2R3	S19	polyploidization
	C. morifolium 1014.79	R2R3	S19	polyploidization
	C. morifolium 1017.277	R2R3	S19	transposon mediated duplication
	C. morifolium 1810.79	R2R3	S21	polyploidization
	C. morifolium 1270.162	1R	I-BOX-BINGDING	polyploidization
	C. morifolium asm3_new.2345	R2R3	S2	polyploidization
	C. morifolium 1390.77	R2R3	S6	polyploidization
	C. morifolium 822.156	R2R3	S19	tandem duplication
	C. morifolium 247.219	R2R3	S21	polyploidization
	C. morifolium 2947.10	R2R3	S2	polyploidization
	C. morifolium 15.52	R2R3	S21	polyploidization
	C. morifolium 1584.1	1R	CCA1-LIKE	transposon mediated duplication
	C. morifolium 1350.26	R2R3	S4	polyploidization
	C. morifolium asm7_new.266	R2R3	S17	polyploidization
	C. morifolium 2247.36	R2R3	S17	polyploidization
	C. morifolium 5.3	R2R3	S4	polyploidization
Cluster B2	C. morifolium 1795.216	1R	TBP-LIKE	polyploidization	0.578097
	C. morifolium 1363.22	R2R3	S22	polyploidization	0.345683
	C. morifolium 284.105	1R	CCA1-LIKE	polyploidization	0.337965
	C. morifolium 1425.175	1R	CCA1-LIKE	polyploidization	0.297603
	C. morifolium asm3_new.1148	1R	CCA1-LIKE	polyploidization	0.297603
	C. morifolium 499.190.2	1R	TBP-LIKE	transposon mediated duplication	0.163378
	C. morifolium 692.355	1R	CCA1-LIKE	polyploidization
	C. morifolium 1273.35	3R	3R	polyploidization
	C. morifolium 8985.11	1R	TBP-LIKE	transposon mediated duplication
	C. morifolium 10724.5	1R	r-r-TYPE	polyploidization
	C. morifolium 5271.14	1R	CCA1-LIKE	polyploidization
	C. morifolium 1780.13	1R	CCA1-LIKE	polyploidization
	C. morifolium 8286.351	1R	r-r-TYPE	polyploidization
	C. morifolium 940.37	R2R3	S4	polyploidization
	C. morifolium 455.191	1R	TRF-LIKE	transposon mediated duplication
	C. morifolium 392.52	1R	CPC-LIKE	polyploidization
	C. morifolium 10415.3	1R	TBP-LIKE	transposon mediated duplication
	C. morifolium 1829.173	1R	TRF-LIKE	tandem duplication
	C. morifolium 2926.6	1R	CCA1-LIKE	polyploidization
	C. morifolium 2416.5	1R	TBP-LIKE	polyploidization
	C. morifolium 1470.35	1R	TBP-LIKE	polyploidization
Cluster B3	C. morifolium asm20_new.1011	1R	CCA1-LIKE	transposon mediated duplication	1.1897
	C. morifolium 409.102	1R	TBP-LIKE	polyploidization	0.75428
	C. morifolium 500.8	1R	CCA1-LIKE	polyploidization	0.719614
	C. morifolium 1142.138	1R	TBP-LIKE	polyploidization	0.664467
	C. morifolium asm16_new.2832	3R	3R	polyploidization	0.659327
	C. morifolium 590.90	1R	CCA1-LIKE	polyploidization	0.621527
	C. morifolium 1534.303	1R	TBP-LIKE	polyploidization	0.58903
	C. morifolium 225.632_C. morifolium 225.634	1R	CCA1-LIKE	polyploidization	0.572621
	C. morifolium 901.18	1R	r-r-TYPE	polyploidization	0.553104
	C. morifolium 1463.15	1R	CCA1-LIKE	polyploidization	0.55138
	C. morifolium 1566.29	R2R3	S8	polyploidization	0.516765
	C. morifolium 10592.64	1R	CCA1-LIKE	polyploidization	0.459736
	C. morifolium 24.248	R2R3	S20	polyploidization	0.430255
	C. morifolium 5234.52	1R	TBP-LIKE	polyploidization	0.419521
	C. morifolium 1568.60	R2R3	S22	polyploidization	0.403063
	C. morifolium 2432.15	R2R3	S2	polyploidization	0.349304
	C. morifolium 61.158	R2R3	S25	polyploidization	0.347076
	C. morifolium 248.19	1R	CCA1-LIKE	segmental duplication	0.304083
	C. morifolium 393.6	1R	CCA1-LIKE	polyploidization	0.304083
	C. morifolium 1678.244	1R	r-r-TYPE	transposon mediated duplication	0.29994
	C. morifolium 1762.59	R2R3	S22	polyploidization	0.297239
	C. morifolium 1000.290	1R	r-r-TYPE	polyploidization	0.27857
	C. morifolium 155.19	R2R3	S26	polyploidization	0.259136
	C. morifolium 1005.271	R2R3	S2	polyploidization	0.23574
	C. morifolium 952.378	1R	CCA1-LIKE	polyploidization	0.150687
	C. morifolium 8978.22	4R	4R	polyploidization	0.125832
	C. morifolium 1659.241	R2R3	S2	polyploidization	0.101422
	C. morifolium 764.299	R2R3	S21	polyploidization	0.0725285
	C. morifolium 1021.184	1R	r-r-TYPE	polyploidization	0.0494701
	C. morifolium 462.14	1R	r-r-TYPE	polyploidization	0.0451953
	C. morifolium 1303.470.3	1R	CCA1-LIKE	transposon mediated duplication	0
	C. morifolium 103.21	1R	r-r-TYPE	polyploidization	0
	C. morifolium 393.191	R2R3	S1	polyploidization	0
	C. morifolium 1450.47	R2R3	S18	polyploidization	0
	C. morifolium 1365.142	R2R3	S18	polyploidization	0
	C. morifolium 560.105	1R	r-r-TYPE	polyploidization	0
	C. morifolium 1007.337	R2R3	S7	polyploidization
	C. morifolium 846.54	R2R3	S2	polyploidization
	C. morifolium 11816.206	1R	r-r-TYPE	polyploidization
	C. morifolium 209.350	R2R3	S25	polyploidization
	C. morifolium 9874.164	1R	CCA1-LIKE	polyploidization
	C. morifolium 1438.767	R2R3	S25	transposon mediated duplication
	C. morifolium 212.80	R2R3	S6	polyploidization
	C. morifolium 1116.217	R2R3	S8	polyploidization
	C. morifolium 212.89	R2R3	S6	tandem duplication
	C. morifolium 175.102	1R	TBP-LIKE	polyploidization
	C. morifolium 7863.5	R2R3	S20	polyploidization
	C. morifolium 701.41	R2R3	S25	polyploidization
	C. morifolium 1477.116	1R	TBP-LIKE	polyploidization
	C. morifolium 1124.237	R2R3	S20	polyploidization
	C. morifolium 9050.89	1R	TBP-LIKE	polyploidization
	C. morifolium 1363.23	R2R3	S22	tandem duplication
	C. morifolium 1757.40	R2R3	S4	polyploidization
	C. morifolium 5424.109	1R	TBP-LIKE	polyploidization
	C. morifolium 1440.23	R2R3	S25	transposon mediated duplication
	C. morifolium 7131.41	1R	r-r-TYPE	polyploidization
	C. morifolium 1693.395	R2R3	S2	polyploidization
	C. morifolium 629.219	R2R3	S8	polyploidization
	C. morifolium 7588.103	R2R3	S18	polyploidization
	C. morifolium 1498.72	R2R3	S20	transposon mediated duplication
	C. morifolium 1303.18	1R	CCA1-LIKE	transposon mediated duplication
	C. morifolium 965.144	R2R3	S22	polyploidization
	C. morifolium 11081.169	1R	r-r-TYPE	polyploidization
	C. morifolium 407.77	1R	CCA1-LIKE	polyploidization
	C. morifolium 1303.148.2	1R	CCA1-LIKE	transposon mediated duplication
	C. morifolium 863.16	R2R3	S24	polyploidization
	C. morifolium 9043.330	R2R3	S20	polyploidization
	C. morifolium asm16_new.140	R2R3	S1	polyploidization
	C. morifolium 537.34	1R	TBP-LIKE	polyploidization
	C. morifolium 1710.109	1R	r-r-TYPE	polyploidization
	C. morifolium 216.61	1R	r-r-TYPE	polyploidization
	C. morifolium 1730.281	1R	TBP-LIKE	polyploidization
	C. morifolium 302.4	R2R3	S1	polyploidization
	C. morifolium 745.87	1R	r-r-TYPE	polyploidization
	C. morifolium 1400.523	1R	r-r-TYPE	polyploidization
	C. morifolium 518.474	R2R3	S4	polyploidization
	C. morifolium 400.108	1R	TBP-LIKE	polyploidization
	C. morifolium 508.450	1R	TRF-LIKE	polyploidization
	C. morifolium 1634.39	R2R3	S26	polyploidization
	C. morifolium 1451.103	R2R3	S21	polyploidization
	C. morifolium 704.31	1R	TBP-LIKE	polyploidization
	C. morifolium 250.617	R2R3	S2	polyploidization
	C. morifolium 1327.74	1R	TRF-LIKE	polyploidization
	C. morifolium 380.14	R2R3	S20	polyploidization
	C. morifolium 1454.215	R2R3	S21	polyploidization
	C. morifolium 117.173	R2R3	S18	polyploidization
	C. morifolium 1534.27	1R	TBP-LIKE	polyploidization
	C. morifolium 600.39	R2R3	S1	polyploidization
	C. morifolium 759.124	R2R3	S1	polyploidization
	C. morifolium 1236.59	4R	4R	polyploidization
	C. morifolium 7753.67	1R	CCA1-LIKE	polyploidization
	C. morifolium 117.390	R2R3	S18	polyploidization
	C. morifolium 1279.179	R2R3	S25	polyploidization
	C. morifolium 3285.38	R2R3	S18	polyploidization
	C. morifolium 727.220	1R	TBP-LIKE	polyploidization
	C. morifolium 1764.21	1R	CCA1-LIKE	polyploidization
	C. morifolium 1371.479	R2R3	S1	polyploidization
	C. morifolium 1226.2	R2R3	S8	polyploidization
	C. morifolium 1874.122	1R	TBP-LIKE	polyploidization
	C. morifolium 11418.61	3R	3R	polyploidization
	C. morifolium 919.34	1R	r-r-TYPE	polyploidization
	C. morifolium 1386.67	R2R3	S25	polyploidization

## Sheet: Table S9
Table S9. The number of the MYB gene families in different plant genomes.
			Size of Geonome	Ploidy	MYB number	Reference
Dicotyledoneae	Asteraceae	Chrysanthemum nankingense	3.07Gb	2n=18	324	Ai et al., 2023
		Cynara cardunculus var. scolymus	725.0Mb	2n=34	282	http://planttfdb.gao-lab.org/
		Chrysanthemum seticuspe	3 Gb	2n=18	162
		Chrysanthemum lavandulifolium	2.7 Gb	2n=18	220
		Helianthus annuus	3 Gb	2n=34	386
		Lactuca sativa	2.6 Gb	2n=18	280
		Chrysanthemum x morifolium	8.15Gb	2n=54	722
	Brassicaceae	Arbidoposis thaliana	119.1 Mb	2n=10	198	Chen et al., 2006
		Brassica napus	1 Gb	2n=38	740	http://planttfdb.gao-lab.org/
		Brassica oleracea	488.6 Mb	2n=18	508	http://planttfdb.gao-lab.org/
		Camelina sativa	641.4 Mb	2n=40	639	http://planttfdb.gao-lab.org/
	Rosaceae	Catharanthus roseus	581.5 Mb	2n=16	254	http://planttfdb.gao-lab.org/
		Malus sieversii	653.6 Mb	2n=34	457	Ding et al., 2018
		Prunus persica	227.4Mb	2n=16	256	Zhang et al., 2018
	Other	Dianthus caryophyllus	636.3 Mb	2n=30	148	http://planttfdb.gao-lab.org/
		Glycine max	978.4 Mb	2n=20	342	http://planttfdb.gao-lab.org/
	Early angiosperm	Nelumbo nucifera	804.5 Mb	2n=16	203	http://planttfdb.gao-lab.org/
		Liriodendron chinense	1.7 Gb	2n=38	190	Wu et al., 2018
Monocotyledoneae	Orchidaceae	Cymbidium ensifolium	3.56Gb	2n=40	136	Ke et al., 2018
		Phalaenopsis equestris	1.1 Gb	2n=38	177	http://planttfdb.gao-lab.org/
	Other	Aegilops tauschii	4.2 Gb	2n=14	202	http://planttfdb.gao-lab.org/
		Brachypodium distachyon	271.2 Mb	2n=10	122	Chen et al., 2017
		Oryza sativa subsp. japonica	373.8 Mb	2n=24	183	Chen et al., 2006
